# Supplementary material for: Cell-Based Screen Identifies Human Interferon-Stimulated Regulators of Listeria monocytogenes Infection
Source: PLoS Pathog. 2016 Dec 21;12(12):e1006102. doi: 10.1371/journal.ppat.1006102 (PMC5176324; doi:10.1371/journal.ppat.1006102)
Supplement: S2 Table — Tab 1 Differential gene expression between STAT1-deficient fibroblasts transduced with lentivirus expressing Fluc or MYD88. Tab 2 Upstream regulators identified by Ingenuity Pathway Analysis for MYD88-regulated genes. (XLSX) [file ppat.1006102.s006.xlsx]

## Sheet: Tab 1
gene	locus	sample_1	sample_2	FPKM_value_Fluc	FPKM_value_MyD88	log2.fold_change	p_value	q_value	significant	contrast
ABCA7	19:1040101-1065571	Fluc	MyD88	1.31194	0.5717	-1.19837	5e-05	0.00250269	yes	Fluc vs MyD88
ABHD4	14:23067146-23081265	Fluc	MyD88	12.5618	6.85798	-0.873194	5e-05	0.00250269	yes	Fluc vs MyD88
ABI3BP	3:100468178-100712334	Fluc	MyD88	3.11038	12.535	2.0108	5e-05	0.00250269	yes	Fluc vs MyD88
ABLIM3	5:148521053-148639999	Fluc	MyD88	2.12952	5.60423	1.39599	5e-05	0.00250269	yes	Fluc vs MyD88
ACTG2	2:74120092-74146780	Fluc	MyD88	4.74928	11.3979	1.26299	5e-05	0.00250269	yes	Fluc vs MyD88
ADAM33	20:3648619-3662738	Fluc	MyD88	7.7528	2.85378	-1.44184	5e-05	0.00250269	yes	Fluc vs MyD88
ADAMTS1	21:28208605-28217728	Fluc	MyD88	14.3568	24.6647	0.780712	5e-05	0.00250269	yes	Fluc vs MyD88
ADAMTSL1	9:18474078-18910948	Fluc	MyD88	19.5925	9.71298	-1.01232	5e-05	0.00250269	yes	Fluc vs MyD88
ADORA2A	22:24823529-24890783	Fluc	MyD88	1.40065	3.77338	1.42976	5e-05	0.00250269	yes	Fluc vs MyD88
AHNAK2	14:105403590-105444694	Fluc	MyD88	0.599558	0.234216	-1.35606	5e-05	0.00250269	yes	Fluc vs MyD88
AMIGO2	12:47469489-47473734	Fluc	MyD88	18.259	36.3826	0.994641	5e-05	0.00250269	yes	Fluc vs MyD88
AMOT	X:112018104-112084043	Fluc	MyD88	3.92298	2.12144	-0.886908	5e-05	0.00250269	yes	Fluc vs MyD88
AMPD3	11:10471867-10529126	Fluc	MyD88	0.388526	2.00026	2.3641	5e-05	0.00250269	yes	Fluc vs MyD88
ANK1	8:41510743-41754280	Fluc	MyD88	0.487894	0.15678	-1.63783	5e-05	0.00250269	yes	Fluc vs MyD88
ANXA1	9:75766780-75785307	Fluc	MyD88	71.9512	37.5179	-0.93944	5e-05	0.00250269	yes	Fluc vs MyD88
ARC	8:143692404-143695833	Fluc	MyD88	1.32806	0.440328	-1.59267	5e-05	0.00250269	yes	Fluc vs MyD88
ATP13A3	3:194123402-194188968	Fluc	MyD88	21.5575	38.4747	0.835716	5e-05	0.00250269	yes	Fluc vs MyD88
ATP2B1	12:89981825-90049844	Fluc	MyD88	15.6746	29.093	0.892239	5e-05	0.00250269	yes	Fluc vs MyD88
ATP2B4	1:203595914-203713209	Fluc	MyD88	10.7181	6.07057	-0.82014	5e-05	0.00250269	yes	Fluc vs MyD88
ATP8B1	18:55297533-55470327	Fluc	MyD88	13.2374	7.95863	-0.734023	5e-05	0.00250269	yes	Fluc vs MyD88
ATP8B3	19:1782073-1812275	Fluc	MyD88	0.463747	0.160986	-1.52641	5e-05	0.00250269	yes	Fluc vs MyD88
BCAT1	12:24962957-25102393	Fluc	MyD88	20.3767	36.7878	0.85231	5e-05	0.00250269	yes	Fluc vs MyD88
BDKRB1	14:96722546-96731100	Fluc	MyD88	2.17119	8.02777	1.88651	5e-05	0.00250269	yes	Fluc vs MyD88
BDKRB2	14:96671134-96710666	Fluc	MyD88	0.486201	2.14099	2.13865	5e-05	0.00250269	yes	Fluc vs MyD88
BIRC3	11:102188180-102210134	Fluc	MyD88	0.156239	0.592258	1.92247	5e-05	0.00250269	yes	Fluc vs MyD88
BMPER	7:33944522-34195484	Fluc	MyD88	4.34799	7.72992	0.830105	5e-05	0.00250269	yes	Fluc vs MyD88
C15orf52	15:40623652-40633168	Fluc	MyD88	3.56137	6.14752	0.787575	5e-05	0.00250269	yes	Fluc vs MyD88
C1QTNF1	17:77015290-77045870	Fluc	MyD88	0.47403	3.71428	2.97003	5e-05	0.00250269	yes	Fluc vs MyD88
C1S	12:7167979-7178336	Fluc	MyD88	5.26634	11.2866	1.09973	5e-05	0.00250269	yes	Fluc vs MyD88
C3	19:6677845-6720662	Fluc	MyD88	0.510861	19.0678	5.22206	5e-05	0.00250269	yes	Fluc vs MyD88
C6orf228	6:11094265-11138971	Fluc	MyD88	7.68598	13.2163	0.782021	5e-05	0.00250269	yes	Fluc vs MyD88
CA9	9:35673914-35681156	Fluc	MyD88	11.4855	6.03723	-0.927859	5e-05	0.00250269	yes	Fluc vs MyD88
CACNG4	17:64960979-65029518	Fluc	MyD88	4.06091	1.59818	-1.34538	5e-05	0.00250269	yes	Fluc vs MyD88
CCDC85A	2:56411257-56613309	Fluc	MyD88	14.0386	5.94135	-1.24054	5e-05	0.00250269	yes	Fluc vs MyD88
CCL11	17:32612686-32615199	Fluc	MyD88	0	3.16706	Inf	5e-05	0.00250269	yes	Fluc vs MyD88
CCL2	17:32582295-32584222	Fluc	MyD88	4.35278	79.8738	4.19771	5e-05	0.00250269	yes	Fluc vs MyD88
CD82	11:44587140-44641339	Fluc	MyD88	47.8512	106.132	1.14924	5e-05	0.00250269	yes	Fluc vs MyD88
CD83	6:14117486-14137149	Fluc	MyD88	2.45062	4.99173	1.02639	5e-05	0.00250269	yes	Fluc vs MyD88
CDH18	5:19473139-19988353	Fluc	MyD88	1.92199	0.450497	-2.09301	5e-05	0.00250269	yes	Fluc vs MyD88
CDKN2C	1:51434366-51440309	Fluc	MyD88	34.8147	19.0037	-0.873416	5e-05	0.00250269	yes	Fluc vs MyD88
CFB	6:31913720-31919861	Fluc	MyD88	0.528157	2.61806	2.30946	5e-05	0.00250269	yes	Fluc vs MyD88
CGNL1	15:57668702-57842925	Fluc	MyD88	1.60505	0.530642	-1.59681	5e-05	0.00250269	yes	Fluc vs MyD88
CHRDL1	X:109917083-110039286	Fluc	MyD88	1.9264	0.383693	-2.32789	5e-05	0.00250269	yes	Fluc vs MyD88
CITED2	6:139693391-139695787	Fluc	MyD88	83.4819	43.3815	-0.944384	5e-05	0.00250269	yes	Fluc vs MyD88
CLU	8:27454433-27472328	Fluc	MyD88	18.0896	9.66226	-0.904726	5e-05	0.00250269	yes	Fluc vs MyD88
CNKSR3	6:154726432-154831753	Fluc	MyD88	5.29408	2.89435	-0.871141	5e-05	0.00250269	yes	Fluc vs MyD88
COL11A1	1:103342022-103574052	Fluc	MyD88	3.18038	1.69691	-0.906289	5e-05	0.00250269	yes	Fluc vs MyD88
COL16A1	1:32117847-32169768	Fluc	MyD88	1.87041	4.67714	1.32227	5e-05	0.00250269	yes	Fluc vs MyD88
COL4A5	X:107683073-107940775	Fluc	MyD88	1.79619	0.916597	-0.970579	5e-05	0.00250269	yes	Fluc vs MyD88
COL5A3	19:10070236-10121147	Fluc	MyD88	18.6684	39.9125	1.09624	5e-05	0.00250269	yes	Fluc vs MyD88
COL7A1	3:48601505-48632593	Fluc	MyD88	58.5963	103.637	0.822662	5e-05	0.00250269	yes	Fluc vs MyD88
COL9A2	1:40766162-40782939	Fluc	MyD88	2.03082	0.929371	-1.12774	5e-05	0.00250269	yes	Fluc vs MyD88
COLEC12	18:319354-500729	Fluc	MyD88	5.23181	1.90675	-1.4562	5e-05	0.00250269	yes	Fluc vs MyD88
CPA4	7:129932973-129964020	Fluc	MyD88	27.8344	15.477	-0.846745	5e-05	0.00250269	yes	Fluc vs MyD88
CPZ	4:8594386-8621488	Fluc	MyD88	3.42269	1.52047	-1.17061	5e-05	0.00250269	yes	Fluc vs MyD88
CSPG4	15:75966662-76005189	Fluc	MyD88	13.9193	7.84411	-0.827401	5e-05	0.00250269	yes	Fluc vs MyD88
CTSS	1:150702671-150738433	Fluc	MyD88	0.0705021	1.399	4.31059	5e-05	0.00250269	yes	Fluc vs MyD88
CXCL1	4:74735108-74737019	Fluc	MyD88	0.705719	64.1805	6.5069	5e-05	0.00250269	yes	Fluc vs MyD88
CXCL2	4:74962751-74964997	Fluc	MyD88	0.470388	24.8206	5.72154	5e-05	0.00250269	yes	Fluc vs MyD88
CXCL3	4:74902305-74904490	Fluc	MyD88	0.610676	61.0592	6.64366	5e-05	0.00250269	yes	Fluc vs MyD88
CXCL5	4:74861358-74864416	Fluc	MyD88	0.183147	6.99708	5.25568	5e-05	0.00250269	yes	Fluc vs MyD88
CYP24A1	20:52769987-52790516	Fluc	MyD88	2.85431	1.31007	-1.12349	5e-05	0.00250269	yes	Fluc vs MyD88
DACT1	14:59100785-59115039	Fluc	MyD88	6.03763	12.4435	1.04333	5e-05	0.00250269	yes	Fluc vs MyD88
DBNDD1	16:90071278-90085937	Fluc	MyD88	4.64023	2.13207	-1.12194	5e-05	0.00250269	yes	Fluc vs MyD88
DCLK2	4:150999425-151178609	Fluc	MyD88	5.87433	2.83064	-1.05329	5e-05	0.00250269	yes	Fluc vs MyD88
DDB2	11:47236492-47260769	Fluc	MyD88	22.6498	12.0975	-0.904791	5e-05	0.00250269	yes	Fluc vs MyD88
DIO2	14:80663867-80921810	Fluc	MyD88	1.50769	0.502578	-1.58492	5e-05	0.00250269	yes	Fluc vs MyD88
DPP4	2:162848754-162931052	Fluc	MyD88	0.627	2.57208	2.0364	5e-05	0.00250269	yes	Fluc vs MyD88
DRAM1	12:102271104-102317401	Fluc	MyD88	7.34273	13.5518	0.884092	5e-05	0.00250269	yes	Fluc vs MyD88
DTX4	11:58939811-58980494	Fluc	MyD88	0.652749	1.28474	0.97688	5e-05	0.00250269	yes	Fluc vs MyD88
DUSP6	12:89741836-89746296	Fluc	MyD88	6.80646	13.9555	1.03586	5e-05	0.00250269	yes	Fluc vs MyD88
DYSF	2:71680752-71913893	Fluc	MyD88	1.95942	0.739786	-1.40525	5e-05	0.00250269	yes	Fluc vs MyD88
EDA2R	X:65815478-65859140	Fluc	MyD88	3.02888	1.49662	-1.01707	5e-05	0.00250269	yes	Fluc vs MyD88
ELFN2	22:37763999-37823505	Fluc	MyD88	5.78703	2.47731	-1.22405	5e-05	0.00250269	yes	Fluc vs MyD88
EPHA3	3:89156673-89531284	Fluc	MyD88	0.774319	0.167694	-2.20709	5e-05	0.00250269	yes	Fluc vs MyD88
EPHA4	2:222282746-222437010	Fluc	MyD88	2.84474	1.13563	-1.32481	5e-05	0.00250269	yes	Fluc vs MyD88
EPHB1	3:134514098-134979309	Fluc	MyD88	0.314117	0.930026	1.56597	5e-05	0.00250269	yes	Fluc vs MyD88
EPS8L2	11:706119-727727	Fluc	MyD88	4.8407	2.21811	-1.12588	5e-05	0.00250269	yes	Fluc vs MyD88
ESM1	5:54273694-54281414	Fluc	MyD88	1.04591	5.90853	2.49804	5e-05	0.00250269	yes	Fluc vs MyD88
ETV4	17:41605210-41623800	Fluc	MyD88	3.13717	6.64221	1.0822	5e-05	0.00250269	yes	Fluc vs MyD88
F2RL1	5:76114832-76131140	Fluc	MyD88	1.97948	5.05696	1.35315	5e-05	0.00250269	yes	Fluc vs MyD88
FAM129A	1:184760165-184943682	Fluc	MyD88	2.31577	1.11999	-1.04801	5e-05	0.00250269	yes	Fluc vs MyD88
FAM84B	8:127564682-127570711	Fluc	MyD88	2.14976	0.87307	-1.30001	5e-05	0.00250269	yes	Fluc vs MyD88
FBXO32	8:124510126-124553493	Fluc	MyD88	1.45808	5.93176	2.02439	5e-05	0.00250269	yes	Fluc vs MyD88
FER1L4	20:34146506-34195484	Fluc	MyD88	1.86092	0.733554	-1.34304	5e-05	0.00250269	yes	Fluc vs MyD88
FHL1	X:135228860-135293518	Fluc	MyD88	16.1582	8.68435	-0.895773	5e-05	0.00250269	yes	Fluc vs MyD88
FMN2	1:240255184-240638489	Fluc	MyD88	5.21196	2.36531	-1.13979	5e-05	0.00250269	yes	Fluc vs MyD88
FOXO1	13:41129800-41240734	Fluc	MyD88	0.417135	1.26316	1.59845	5e-05	0.00250269	yes	Fluc vs MyD88
FST	5:52776263-52782304	Fluc	MyD88	8.97539	4.6608	-0.945397	5e-05	0.00250269	yes	Fluc vs MyD88
GABRE	X:151121595-151143151	Fluc	MyD88	3.32673	1.51349	-1.13622	5e-05	0.00250269	yes	Fluc vs MyD88
GALNT5	2:158114339-158167913	Fluc	MyD88	1.91711	0.902497	-1.08694	5e-05	0.00250269	yes	Fluc vs MyD88
GDNF	5:37812778-37839782	Fluc	MyD88	2.01334	5.01717	1.31729	5e-05	0.00250269	yes	Fluc vs MyD88
GFRA1	10:117816435-118033126	Fluc	MyD88	5.71078	3.06084	-0.89976	5e-05	0.00250269	yes	Fluc vs MyD88
GNAO1	16:56225250-56391356	Fluc	MyD88	0.392418	1.00154	1.35175	5e-05	0.00250269	yes	Fluc vs MyD88
GPRC5B	16:19870292-19896151	Fluc	MyD88	2.99162	9.39292	1.65065	5e-05	0.00250269	yes	Fluc vs MyD88
GRAMD3	5:125695787-125829853	Fluc	MyD88	3.82561	1.9741	-0.954498	5e-05	0.00250269	yes	Fluc vs MyD88
GSN	9:124030379-124095120	Fluc	MyD88	28.6539	16.0681	-0.834533	5e-05	0.00250269	yes	Fluc vs MyD88
HAPLN1	5:82934016-83016896	Fluc	MyD88	0.748728	0.239066	-1.64703	5e-05	0.00250269	yes	Fluc vs MyD88
HAS2	8:122625270-122657565	Fluc	MyD88	8.95644	31.631	1.82034	5e-05	0.00250269	yes	Fluc vs MyD88
HDAC9	7:18126571-19036993	Fluc	MyD88	0.52493	1.695	1.69109	5e-05	0.00250269	yes	Fluc vs MyD88
HMCN1	1:185703682-186160085	Fluc	MyD88	0.774926	0.282927	-1.45363	5e-05	0.00250269	yes	Fluc vs MyD88
HMGA2	12:66151799-66360071	Fluc	MyD88	8.1181	16.2312	0.999553	5e-05	0.00250269	yes	Fluc vs MyD88
HS3ST3A1	17:13399005-13505244	Fluc	MyD88	1.88623	3.80484	1.01233	5e-05	0.00250269	yes	Fluc vs MyD88
HSPA1A	6:31783290-31785719	Fluc	MyD88	108.833	46.6716	-1.2215	5e-05	0.00250269	yes	Fluc vs MyD88
HSPA6	1:161494035-161496687	Fluc	MyD88	14.9137	0.366651	-5.34609	5e-05	0.00250269	yes	Fluc vs MyD88
ICAM1	19:10381516-10397291	Fluc	MyD88	1.17554	7.67142	2.70617	5e-05	0.00250269	yes	Fluc vs MyD88
ICOSLG	21:45646720-45660834	Fluc	MyD88	0.984273	2.58634	1.39378	5e-05	0.00250269	yes	Fluc vs MyD88
ID1	20:30193085-30194318	Fluc	MyD88	95.0866	36.925	-1.36464	5e-05	0.00250269	yes	Fluc vs MyD88
ID2	2:8822112-8824583	Fluc	MyD88	48.0514	13.1785	-1.86639	5e-05	0.00250269	yes	Fluc vs MyD88
ID3	1:23884420-23886285	Fluc	MyD88	86.2282	48.0649	-0.843177	5e-05	0.00250269	yes	Fluc vs MyD88
IER3	6:30710975-30712327	Fluc	MyD88	98.0864	283.539	1.53142	5e-05	0.00250269	yes	Fluc vs MyD88
IFI44	1:79115476-79129763	Fluc	MyD88	3.12111	6.42963	1.04268	5e-05	0.00250269	yes	Fluc vs MyD88
IGF2	11:2150341-2182439	Fluc	MyD88	0.338392	8.66277	4.67806	5e-05	0.00250269	yes	Fluc vs MyD88
IGFBP3	7:45951843-45960871	Fluc	MyD88	42.0203	13.8737	-1.59874	5e-05	0.00250269	yes	Fluc vs MyD88
IGFBP6	12:53491435-53496128	Fluc	MyD88	52.4946	27.6553	-0.924611	5e-05	0.00250269	yes	Fluc vs MyD88
IL11	19:55875749-55881831	Fluc	MyD88	46.12	128.087	1.47366	5e-05	0.00250269	yes	Fluc vs MyD88
IL1B	2:113587336-113594356	Fluc	MyD88	0.257312	18.3904	6.15929	5e-05	0.00250269	yes	Fluc vs MyD88
IL32	16:3115312-3119668	Fluc	MyD88	2.60612	14.9164	2.51693	5e-05	0.00250269	yes	Fluc vs MyD88
IL6	7:22765013-22771621	Fluc	MyD88	0.525721	11.9889	4.51126	5e-05	0.00250269	yes	Fluc vs MyD88
IL8	4:74606222-74609433	Fluc	MyD88	2.37879	323.206	7.08608	5e-05	0.00250269	yes	Fluc vs MyD88
INHBA	7:41728600-41818976	Fluc	MyD88	36.6417	156.893	2.09823	5e-05	0.00250269	yes	Fluc vs MyD88
IRAK2	3:10206562-10285427	Fluc	MyD88	1.56249	7.08976	2.18189	5e-05	0.00250269	yes	Fluc vs MyD88
ITGBL1	13:102104965-102368794	Fluc	MyD88	13.71	7.36081	-0.897294	5e-05	0.00250269	yes	Fluc vs MyD88
JAG1	20:10618331-10654694	Fluc	MyD88	21.1603	47.5051	1.16672	5e-05	0.00250269	yes	Fluc vs MyD88
JAG2	14:105607317-105635161	Fluc	MyD88	1.23615	0.416196	-1.57052	5e-05	0.00250269	yes	Fluc vs MyD88
JUNB	19:12902309-12904125	Fluc	MyD88	11.9547	22.7757	0.929923	5e-05	0.00250269	yes	Fluc vs MyD88
KCNE4	2:223916861-223920355	Fluc	MyD88	6.60112	3.05881	-1.10974	5e-05	0.00250269	yes	Fluc vs MyD88
KIT	4:55524094-55606881	Fluc	MyD88	2.89633	1.42844	-1.01978	5e-05	0.00250269	yes	Fluc vs MyD88
KLF9	9:72999512-73029573	Fluc	MyD88	1.76744	3.35808	0.925973	5e-05	0.00250269	yes	Fluc vs MyD88
KRT18	12:53290970-53346685	Fluc	MyD88	286.118	125.071	-1.19386	5e-05	0.00250269	yes	Fluc vs MyD88
LAMB3	1:209788214-209825820	Fluc	MyD88	1.21163	3.84451	1.66585	5e-05	0.00250269	yes	Fluc vs MyD88
LCP1	13:46700057-46756459	Fluc	MyD88	0.279346	1.92301	2.78324	5e-05	0.00250269	yes	Fluc vs MyD88
LHX9	1:197881634-197899273	Fluc	MyD88	2.13722	0.388602	-2.45937	5e-05	0.00250269	yes	Fluc vs MyD88
LIF	22:30636435-30642840	Fluc	MyD88	4.91347	24.699	2.32964	5e-05	0.00250269	yes	Fluc vs MyD88
LINC00623	1:144300511-144340773	Fluc	MyD88	0.951572	3.03236	1.67206	5e-05	0.00250269	yes	Fluc vs MyD88
LMO7	13:76194569-76434006	Fluc	MyD88	10.3573	4.28485	-1.27334	5e-05	0.00250269	yes	Fluc vs MyD88
LOC100132891	8:72753776-72987819	Fluc	MyD88	2.15825	5.41422	1.32689	5e-05	0.00250269	yes	Fluc vs MyD88
LOC100506735	16:88216570-88220526	Fluc	MyD88	10.498	21.4486	1.03077	5e-05	0.00250269	yes	Fluc vs MyD88
LOC100507127	10:6821559-6884868	Fluc	MyD88	3.28933	1.41162	-1.22044	5e-05	0.00250269	yes	Fluc vs MyD88
LOC100507460	2:132442469-132457436	Fluc	MyD88	0.910262	1.89638	1.05889	5e-05	0.00250269	yes	Fluc vs MyD88
LPXN	11:58294343-58345639	Fluc	MyD88	3.67693	9.37986	1.35107	5e-05	0.00250269	yes	Fluc vs MyD88
LRIG1	3:66271148-66550845	Fluc	MyD88	5.81136	24.0571	2.04951	5e-05	0.00250269	yes	Fluc vs MyD88
LRRC17	7:102453307-102715288	Fluc	MyD88	4.97534	12.2316	1.29775	5e-05	0.00250269	yes	Fluc vs MyD88
LUM	12:91497231-91505542	Fluc	MyD88	2.16485	4.79494	1.14725	5e-05	0.00250269	yes	Fluc vs MyD88
LZTS1	8:20103675-20112803	Fluc	MyD88	6.17851	3.19531	-0.951303	5e-05	0.00250269	yes	Fluc vs MyD88
MAFF	22:38597938-38612518	Fluc	MyD88	19.5188	33.923	0.797401	5e-05	0.00250269	yes	Fluc vs MyD88
MAN1A1	6:119498365-119670931	Fluc	MyD88	4.51558	9.47943	1.06989	5e-05	0.00250269	yes	Fluc vs MyD88
MAP2	2:210288770-210598834	Fluc	MyD88	0.579673	0.152381	-1.92755	5e-05	0.00250269	yes	Fluc vs MyD88
MATN2	8:98881310-99048948	Fluc	MyD88	11.1386	5.55967	-1.0025	5e-05	0.00250269	yes	Fluc vs MyD88
MEGF6	1:3404505-3528059	Fluc	MyD88	5.8313	3.33862	-0.804566	5e-05	0.00250269	yes	Fluc vs MyD88
MEST	7:130126015-130371406	Fluc	MyD88	83.9068	43.1332	-0.95999	5e-05	0.00250269	yes	Fluc vs MyD88
MEX3B	15:82334118-82338484	Fluc	MyD88	12.8722	7.62282	-0.755865	5e-05	0.00250269	yes	Fluc vs MyD88
MIR155HG	21:26934456-26947480	Fluc	MyD88	5.7322	10.5048	0.873887	5e-05	0.00250269	yes	Fluc vs MyD88
MME	3:154797435-154901518	Fluc	MyD88	14.6231	31.9811	1.12897	5e-05	0.00250269	yes	Fluc vs MyD88
MMP1	11:102654406-102714342	Fluc	MyD88	0.397125	3.37328	3.08649	5e-05	0.00250269	yes	Fluc vs MyD88
MMP14	14:23305792-23316803	Fluc	MyD88	66.6095	111.446	0.742547	5e-05	0.00250269	yes	Fluc vs MyD88
MMP3	11:102654406-102714342	Fluc	MyD88	1.27538	9.04336	2.82594	5e-05	0.00250269	yes	Fluc vs MyD88
MMP9	20:44637546-44688789	Fluc	MyD88	4.60467	20.6123	2.16233	5e-05	0.00250269	yes	Fluc vs MyD88
MOXD1	6:132617193-132722664	Fluc	MyD88	8.0613	4.30138	-0.906215	5e-05	0.00250269	yes	Fluc vs MyD88
MPP4	2:202509596-202563417	Fluc	MyD88	1.59095	3.3779	1.08624	5e-05	0.00250269	yes	Fluc vs MyD88
MSC	8:72753776-72987819	Fluc	MyD88	3.91042	16.5514	2.08156	5e-05	0.00250269	yes	Fluc vs MyD88
MT1X	16:56716381-56718108	Fluc	MyD88	17.222	45.5982	1.40473	5e-05	0.00250269	yes	Fluc vs MyD88
MT2A	16:56642477-56643409	Fluc	MyD88	151.802	607.301	2.00022	5e-05	0.00250269	yes	Fluc vs MyD88
MYD88	3:38179968-38184513	Fluc	MyD88	12.4104	924.991	6.21982	5e-05	0.00250269	yes	Fluc vs MyD88
MYOCD	17:12569206-12670651	Fluc	MyD88	0.892883	3.98337	2.15745	5e-05	0.00250269	yes	Fluc vs MyD88
NAB1	2:191513847-191557492	Fluc	MyD88	3.69245	7.87635	1.09295	5e-05	0.00250269	yes	Fluc vs MyD88
NAMPT	7:105888730-105925638	Fluc	MyD88	25.4171	53.1299	1.06372	5e-05	0.00250269	yes	Fluc vs MyD88
NCAM2	21:22370632-22912517	Fluc	MyD88	2.53834	1.18177	-1.10294	5e-05	0.00250269	yes	Fluc vs MyD88
NFATC2	20:50003493-50179370	Fluc	MyD88	1.30247	2.55485	0.971993	5e-05	0.00250269	yes	Fluc vs MyD88
NFE2L3	7:26191846-26226757	Fluc	MyD88	5.1587	11.3514	1.13779	5e-05	0.00250269	yes	Fluc vs MyD88
NFKB1	4:103422485-103538459	Fluc	MyD88	8.38949	16.7562	0.998042	5e-05	0.00250269	yes	Fluc vs MyD88
NFKB2	10:104153866-104162286	Fluc	MyD88	10.6549	27.4248	1.36396	5e-05	0.00250269	yes	Fluc vs MyD88
NFKBIA	14:35870715-35873960	Fluc	MyD88	10.5303	38.8842	1.88463	5e-05	0.00250269	yes	Fluc vs MyD88
NFKBIE	6:44225902-44233525	Fluc	MyD88	4.81944	8.85531	0.877677	5e-05	0.00250269	yes	Fluc vs MyD88
NFKBIZ	3:101498028-101579869	Fluc	MyD88	2.02944	14.1793	2.80463	5e-05	0.00250269	yes	Fluc vs MyD88
NIPAL3	1:24742244-24799473	Fluc	MyD88	7.66091	4.35614	-0.814463	5e-05	0.00250269	yes	Fluc vs MyD88
NRP2	2:206547223-206662857	Fluc	MyD88	5.89352	19.3886	1.71801	5e-05	0.00250269	yes	Fluc vs MyD88
NTN1	17:8924858-9147317	Fluc	MyD88	2.41857	5.02829	1.05591	5e-05	0.00250269	yes	Fluc vs MyD88
NUP210	3:13357736-13461809	Fluc	MyD88	1.2428	0.484223	-1.35985	5e-05	0.00250269	yes	Fluc vs MyD88
OLFML3	1:114522029-114524875	Fluc	MyD88	11.9818	6.67918	-0.843107	5e-05	0.00250269	yes	Fluc vs MyD88
OXTR	3:8792093-8811300	Fluc	MyD88	5.20442	2.19905	-1.24286	5e-05	0.00250269	yes	Fluc vs MyD88
PAPPA	9:118916070-119164600	Fluc	MyD88	1.38399	3.53846	1.35429	5e-05	0.00250269	yes	Fluc vs MyD88
PCDH18	4:138440071-138453629	Fluc	MyD88	0.921678	0.300194	-1.61837	5e-05	0.00250269	yes	Fluc vs MyD88
PCDH7	4:30722029-31148423	Fluc	MyD88	2.13675	1.01682	-1.07136	5e-05	0.00250269	yes	Fluc vs MyD88
PDE1C	7:31792631-32338383	Fluc	MyD88	27.5627	9.51849	-1.53392	5e-05	0.00250269	yes	Fluc vs MyD88
PDGFRA	4:55095263-55164412	Fluc	MyD88	4.55606	2.35803	-0.950206	5e-05	0.00250269	yes	Fluc vs MyD88
PEG10	7:94285636-94299007	Fluc	MyD88	23.0909	12.293	-0.909491	5e-05	0.00250269	yes	Fluc vs MyD88
PLAU	10:75669726-75682535	Fluc	MyD88	12.5046	31.8127	1.34714	5e-05	0.00250269	yes	Fluc vs MyD88
PLCD1	3:38048986-38071154	Fluc	MyD88	11.0224	5.81492	-0.922606	5e-05	0.00250269	yes	Fluc vs MyD88
PLXNB3	X:153029650-153044801	Fluc	MyD88	3.45863	1.73906	-0.991893	5e-05	0.00250269	yes	Fluc vs MyD88
POU2F2	19:42590261-42636625	Fluc	MyD88	0.810941	5.5354	2.77102	5e-05	0.00250269	yes	Fluc vs MyD88
PPIF	10:81107219-81115090	Fluc	MyD88	95.0893	219.843	1.20912	5e-05	0.00250269	yes	Fluc vs MyD88
PPL	16:4932507-4987136	Fluc	MyD88	0.433287	0.127061	-1.7698	5e-05	0.00250269	yes	Fluc vs MyD88
PPP2R2B	5:145969066-146461033	Fluc	MyD88	1.97534	0.626853	-1.6559	5e-05	0.00250269	yes	Fluc vs MyD88
PRDM1	6:106534194-106557814	Fluc	MyD88	0.698151	1.43131	1.03573	5e-05	0.00250269	yes	Fluc vs MyD88
PRRX1	1:170633312-170708541	Fluc	MyD88	0.436354	2.13841	2.29296	5e-05	0.00250269	yes	Fluc vs MyD88
PRUNE2	9:79226291-79521003	Fluc	MyD88	0.552881	0.160145	-1.7876	5e-05	0.00250269	yes	Fluc vs MyD88
PTGS2	1:186640943-186649559	Fluc	MyD88	0.488669	1.49152	1.60986	5e-05	0.00250269	yes	Fluc vs MyD88
PTPRK	6:128289923-128841870	Fluc	MyD88	16.771	30.4438	0.860178	5e-05	0.00250269	yes	Fluc vs MyD88
PTPRR	12:71031852-71314584	Fluc	MyD88	0.394164	1.58099	2.00396	5e-05	0.00250269	yes	Fluc vs MyD88
PTX3	3:156977530-157221415	Fluc	MyD88	69.0252	148.671	1.10692	5e-05	0.00250269	yes	Fluc vs MyD88
RASD2	22:35937351-35950046	Fluc	MyD88	6.88841	3.49743	-0.977874	5e-05	0.00250269	yes	Fluc vs MyD88
RELB	19:45504706-45541456	Fluc	MyD88	3.50393	14.6241	2.0613	5e-05	0.00250269	yes	Fluc vs MyD88
RELL1	4:37455551-37687999	Fluc	MyD88	5.27515	12.5649	1.25211	5e-05	0.00250269	yes	Fluc vs MyD88
RFTN1	3:16357351-16555222	Fluc	MyD88	8.13513	17.2859	1.08736	5e-05	0.00250269	yes	Fluc vs MyD88
RGS4	1:163038395-163046592	Fluc	MyD88	18.7893	9.85215	-0.931401	5e-05	0.00250269	yes	Fluc vs MyD88
RHOBTB3	5:95066849-95132071	Fluc	MyD88	30.9826	15.1364	-1.03344	5e-05	0.00250269	yes	Fluc vs MyD88
RHOD	11:66824288-66839488	Fluc	MyD88	9.55099	3.78467	-1.33548	5e-05	0.00250269	yes	Fluc vs MyD88
SBSN	19:36014268-36019253	Fluc	MyD88	3.1021	8.58323	1.46828	5e-05	0.00250269	yes	Fluc vs MyD88
SCG5	15:32933869-32989298	Fluc	MyD88	0.707392	3.63139	2.35994	5e-05	0.00250269	yes	Fluc vs MyD88
SCN9A	2:167051694-167232497	Fluc	MyD88	1.46448	0.308229	-2.24831	5e-05	0.00250269	yes	Fluc vs MyD88
SEL1L3	4:25749048-25864610	Fluc	MyD88	2.03017	1.01279	-1.00327	5e-05	0.00250269	yes	Fluc vs MyD88
SEMA3B	3:50305039-50314573	Fluc	MyD88	2.4621	0.8369	-1.55676	5e-05	0.00250269	yes	Fluc vs MyD88
SERPINB2	18:61554938-61571124	Fluc	MyD88	0.911039	16.5751	4.18536	5e-05	0.00250269	yes	Fluc vs MyD88
SERPINB6	6:2948392-2972399	Fluc	MyD88	37.2153	21.6975	-0.778369	5e-05	0.00250269	yes	Fluc vs MyD88
SERPINE2	2:224839764-224904036	Fluc	MyD88	238.94	139.006	-0.781505	5e-05	0.00250269	yes	Fluc vs MyD88
SFRP1	8:41119475-41166990	Fluc	MyD88	55.665	29.019	-0.939774	5e-05	0.00250269	yes	Fluc vs MyD88
SGK223	8:8175257-8239257	Fluc	MyD88	5.63039	2.46385	-1.19232	5e-05	0.00250269	yes	Fluc vs MyD88
SH2D4A	8:19171080-19253729	Fluc	MyD88	25.8787	9.62892	-1.42632	5e-05	0.00250269	yes	Fluc vs MyD88
SLC39A14	8:22224761-22291642	Fluc	MyD88	47.0868	153.491	1.70476	5e-05	0.00250269	yes	Fluc vs MyD88
SLIT2	4:20255234-20620788	Fluc	MyD88	15.7347	26.8443	0.770663	5e-05	0.00250269	yes	Fluc vs MyD88
SLIT3	5:168093070-168728133	Fluc	MyD88	16.5988	6.8948	-1.2675	5e-05	0.00250269	yes	Fluc vs MyD88
SMAD6	15:66994673-67074338	Fluc	MyD88	2.50331	0.962522	-1.37895	5e-05	0.00250269	yes	Fluc vs MyD88
SOD2	6:160100147-160114353	Fluc	MyD88	41.6553	211.923	2.34696	5e-05	0.00250269	yes	Fluc vs MyD88
SSTR1	14:38677203-38682268	Fluc	MyD88	4.96289	2.64686	-0.906899	5e-05	0.00250269	yes	Fluc vs MyD88
STAC	3:36422096-36589496	Fluc	MyD88	6.15034	2.74898	-1.16177	5e-05	0.00250269	yes	Fluc vs MyD88
STC1	8:23699433-23712320	Fluc	MyD88	8.20723	16.5972	1.01598	5e-05	0.00250269	yes	Fluc vs MyD88
STEAP1	7:89783688-89794141	Fluc	MyD88	1.52754	4.51533	1.56362	5e-05	0.00250269	yes	Fluc vs MyD88
STXBP6	14:25281292-25519095	Fluc	MyD88	3.78962	1.80248	-1.07207	5e-05	0.00250269	yes	Fluc vs MyD88
SYTL5	X:37865834-37988073	Fluc	MyD88	1.58198	0.483377	-1.71051	5e-05	0.00250269	yes	Fluc vs MyD88
TBC1D2	9:100961279-101018003	Fluc	MyD88	8.76741	3.31204	-1.40443	5e-05	0.00250269	yes	Fluc vs MyD88
TFPI2	7:93514708-93520303	Fluc	MyD88	9.61881	19.5073	1.02008	5e-05	0.00250269	yes	Fluc vs MyD88
TFRC	3:195776154-195809032	Fluc	MyD88	90.2123	170.193	0.915772	5e-05	0.00250269	yes	Fluc vs MyD88
THSD1	13:52951301-52980629	Fluc	MyD88	6.06661	3.2547	-0.898368	5e-05	0.00250269	yes	Fluc vs MyD88
TLL1	4:166794409-167025609	Fluc	MyD88	0.966832	0.397583	-1.28201	5e-05	0.00250269	yes	Fluc vs MyD88
TM7SF2	11:64879340-64883707	Fluc	MyD88	3.55887	1.25722	-1.50118	5e-05	0.00250269	yes	Fluc vs MyD88
TMEM132A	11:60691912-60719257	Fluc	MyD88	11.1159	23.9946	1.11009	5e-05	0.00250269	yes	Fluc vs MyD88
TMEM158	3:45265955-45267814	Fluc	MyD88	19.7252	39.5921	1.00518	5e-05	0.00250269	yes	Fluc vs MyD88
TMEM45A	3:100211462-100296285	Fluc	MyD88	4.80274	10.923	1.18543	5e-05	0.00250269	yes	Fluc vs MyD88
TNC	9:117781853-117880536	Fluc	MyD88	107.88	206.666	0.937873	5e-05	0.00250269	yes	Fluc vs MyD88
TNFAIP3	6:138144805-138204451	Fluc	MyD88	1.81959	11.6633	2.68029	5e-05	0.00250269	yes	Fluc vs MyD88
TNFAIP6	2:152214105-152236562	Fluc	MyD88	0.732721	3.00853	2.03772	5e-05	0.00250269	yes	Fluc vs MyD88
TNFAIP8	5:118604417-118730294	Fluc	MyD88	5.51485	10.7212	0.959076	5e-05	0.00250269	yes	Fluc vs MyD88
TNFRSF9	1:7975930-8003225	Fluc	MyD88	0.130581	1.14681	3.13461	5e-05	0.00250269	yes	Fluc vs MyD88
TNIK	3:170780291-171178197	Fluc	MyD88	7.81609	3.39408	-1.20342	5e-05	0.00250269	yes	Fluc vs MyD88
TNIP1	5:150409503-150467221	Fluc	MyD88	44.6107	77.7374	0.80122	5e-05	0.00250269	yes	Fluc vs MyD88
TOX	8:59717976-60031767	Fluc	MyD88	5.41636	2.16047	-1.32598	5e-05	0.00250269	yes	Fluc vs MyD88
TRIM16	17:15531279-15586193	Fluc	MyD88	3.5306	6.5632	0.894486	5e-05	0.00250269	yes	Fluc vs MyD88
TRPV2	17:16318855-16340317	Fluc	MyD88	1.95105	0.904166	-1.10959	5e-05	0.00250269	yes	Fluc vs MyD88
TSHZ2	20:51588945-52111869	Fluc	MyD88	0.411918	0.151866	-1.43955	5e-05	0.00250269	yes	Fluc vs MyD88
TUBB3	16:89988416-90002505	Fluc	MyD88	107.122	65.503	-0.709627	5e-05	0.00250269	yes	Fluc vs MyD88
TWIST1	7:19155090-19157295	Fluc	MyD88	31.4644	12.6541	-1.31412	5e-05	0.00250269	yes	Fluc vs MyD88
UCN2	3:48599150-48601201	Fluc	MyD88	10.141	19.8708	0.970458	5e-05	0.00250269	yes	Fluc vs MyD88
UGCG	9:114659205-114695439	Fluc	MyD88	35.2707	59.4798	0.75393	5e-05	0.00250269	yes	Fluc vs MyD88
UTRN	6:144612872-145174170	Fluc	MyD88	6.06088	3.19785	-0.922427	5e-05	0.00250269	yes	Fluc vs MyD88
VEGFC	4:177604690-177713895	Fluc	MyD88	14.2933	35.5713	1.31538	5e-05	0.00250269	yes	Fluc vs MyD88
WISP1	8:134203281-134243933	Fluc	MyD88	2.27089	4.14431	0.867876	5e-05	0.00250269	yes	Fluc vs MyD88
WNT5A	3:55499742-55521670	Fluc	MyD88	52.825	97.5714	0.885239	5e-05	0.00250269	yes	Fluc vs MyD88
WWC1	5:167719064-167899308	Fluc	MyD88	7.31502	13.3675	0.869796	5e-05	0.00250269	yes	Fluc vs MyD88
ZC3H12A	1:37940118-37949978	Fluc	MyD88	3.79894	22.8976	2.59153	5e-05	0.00250269	yes	Fluc vs MyD88
ZFPM2	8:106331146-106816767	Fluc	MyD88	1.67546	0.808412	-1.0514	5e-05	0.00250269	yes	Fluc vs MyD88
ZNF185	X:152082985-152142025	Fluc	MyD88	4.51015	2.33499	-0.949758	5e-05	0.00250269	yes	Fluc vs MyD88
ZNF238	1:244214560-244220778	Fluc	MyD88	25.5358	11.4371	-1.1588	5e-05	0.00250269	yes	Fluc vs MyD88
ZNF385A	12:54762919-54785083	Fluc	MyD88	8.35829	4.28898	-0.962573	5e-05	0.00250269	yes	Fluc vs MyD88
ZNF469	16:88493878-88507165	Fluc	MyD88	4.09413	7.70591	0.912407	5e-05	0.00250269	yes	Fluc vs MyD88
ZNF697	1:120161999-120190390	Fluc	MyD88	4.87479	9.09398	0.899573	5e-05	0.00250269	yes	Fluc vs MyD88
ABLIM1	10:116190868-116444414	Fluc	MyD88	0.989331	0.446283	-1.1485	0.0001	0.00461519	yes	Fluc vs MyD88
CDCP1	3:45123768-45187914	Fluc	MyD88	6.46258	10.9371	0.759051	0.0001	0.00461519	yes	Fluc vs MyD88
CNTNAP3	9:39072763-39288300	Fluc	MyD88	1.57223	0.780033	-1.01121	0.0001	0.00461519	yes	Fluc vs MyD88
CPNE7	16:89642175-89663654	Fluc	MyD88	3.16461	1.57529	-1.00641	0.0001	0.00461519	yes	Fluc vs MyD88
DNAJA4	15:78556486-78574538	Fluc	MyD88	0.720737	0.12304	-2.55035	0.0001	0.00461519	yes	Fluc vs MyD88
EML1	14:100259744-100408397	Fluc	MyD88	5.28058	9.30305	0.817007	0.0001	0.00461519	yes	Fluc vs MyD88
FCGRT	19:50015535-50029685	Fluc	MyD88	9.55944	5.42189	-0.81813	0.0001	0.00461519	yes	Fluc vs MyD88
FDXR	17:72858618-72869156	Fluc	MyD88	17.9965	10.6144	-0.761698	0.0001	0.00461519	yes	Fluc vs MyD88
FHOD3	18:33877701-34360018	Fluc	MyD88	4.20746	7.34373	0.803564	0.0001	0.00461519	yes	Fluc vs MyD88
FLOT2	17:27206356-27224715	Fluc	MyD88	29.2555	18.1614	-0.687832	0.0001	0.00461519	yes	Fluc vs MyD88
GCNT1	9:79056581-79122332	Fluc	MyD88	5.78477	3.23765	-0.837315	0.0001	0.00461519	yes	Fluc vs MyD88
KIAA1024	15:79724857-79764642	Fluc	MyD88	0.419468	0.930357	1.14923	0.0001	0.00461519	yes	Fluc vs MyD88
MEDAG	13:31437686-31506745	Fluc	MyD88	3.16979	1.63293	-0.956923	0.0001	0.00461519	yes	Fluc vs MyD88
NAV3	12:78225068-78606790	Fluc	MyD88	1.35001	2.4118	0.837144	0.0001	0.00461519	yes	Fluc vs MyD88
NR2F2	15:96826125-96883492	Fluc	MyD88	26.8271	15.8568	-0.75859	0.0001	0.00461519	yes	Fluc vs MyD88
NXN	17:702552-882998	Fluc	MyD88	17.3987	10.2186	-0.767785	0.0001	0.00461519	yes	Fluc vs MyD88
PLCE1	10:95753745-96088149	Fluc	MyD88	1.14047	0.614083	-0.893125	0.0001	0.00461519	yes	Fluc vs MyD88
PLD1	3:171318194-171528284	Fluc	MyD88	0.767301	1.45518	0.923335	0.0001	0.00461519	yes	Fluc vs MyD88
PLEKHA7	11:16809206-17035963	Fluc	MyD88	0.55906	0.174279	-1.68161	0.0001	0.00461519	yes	Fluc vs MyD88
RARRES2	7:150035406-150038763	Fluc	MyD88	30.3963	16.8111	-0.854478	0.0001	0.00461519	yes	Fluc vs MyD88
RASGRP1	15:38780301-38857007	Fluc	MyD88	0.652184	1.41334	1.11576	0.0001	0.00461519	yes	Fluc vs MyD88
SEMA7A	15:74701629-74726299	Fluc	MyD88	29.3798	48.9863	0.737555	0.0001	0.00461519	yes	Fluc vs MyD88
SPTAN1	9:131314836-131419129	Fluc	MyD88	47.2463	26.8511	-0.81522	0.0001	0.00461519	yes	Fluc vs MyD88
SYT14	1:210111518-210337636	Fluc	MyD88	1.17483	2.20551	0.90866	0.0001	0.00461519	yes	Fluc vs MyD88
TSPAN15	10:71211225-71267423	Fluc	MyD88	3.97916	1.93704	-1.03861	0.0001	0.00461519	yes	Fluc vs MyD88
ZFP36	19:39897486-39900052	Fluc	MyD88	5.14947	2.48097	-1.05352	0.0001	0.00461519	yes	Fluc vs MyD88
BTG2	1:203274663-203278730	Fluc	MyD88	6.6752	3.50528	-0.929281	0.00015	0.00655001	yes	Fluc vs MyD88
EZR	6:159186772-159240456	Fluc	MyD88	138.431	87.5709	-0.660644	0.00015	0.00655001	yes	Fluc vs MyD88
FGF13	X:137713733-138287185	Fluc	MyD88	1.05471	0.369829	-1.51192	0.00015	0.00655001	yes	Fluc vs MyD88
ITGA7	12:56075329-56106089	Fluc	MyD88	2.15837	1.07132	-1.01055	0.00015	0.00655001	yes	Fluc vs MyD88
ITPR2	12:26488284-26986131	Fluc	MyD88	1.60123	2.6311	0.716489	0.00015	0.00655001	yes	Fluc vs MyD88
LOC728392	17:5402746-5404319	Fluc	MyD88	99.2482	61.9978	-0.678825	0.00015	0.00655001	yes	Fluc vs MyD88
MAP1A	15:43809805-43823818	Fluc	MyD88	1.19373	0.67127	-0.830509	0.00015	0.00655001	yes	Fluc vs MyD88
MGP	12:15034114-15038853	Fluc	MyD88	2.13131	0.7051	-1.59584	0.00015	0.00655001	yes	Fluc vs MyD88
NRXN3	14:78870092-80330762	Fluc	MyD88	1.89056	1.06181	-0.832293	0.00015	0.00655001	yes	Fluc vs MyD88
OLFML2A	9:127539436-127577161	Fluc	MyD88	5.66252	3.20657	-0.820416	0.00015	0.00655001	yes	Fluc vs MyD88
PRRT2	16:29823408-29827202	Fluc	MyD88	3.49854	1.71419	-1.02922	0.00015	0.00655001	yes	Fluc vs MyD88
PSD3	8:18384812-18871196	Fluc	MyD88	8.39935	5.26239	-0.674558	0.00015	0.00655001	yes	Fluc vs MyD88
PSG4	19:43696853-43709790	Fluc	MyD88	20.7518	12.1286	-0.774829	0.00015	0.00655001	yes	Fluc vs MyD88
SLC1A3	5:36606456-36688436	Fluc	MyD88	1.82288	3.50517	0.943269	0.00015	0.00655001	yes	Fluc vs MyD88
WTAP	6:160148029-160177351	Fluc	MyD88	51.9534	83.1599	0.67867	0.00015	0.00655001	yes	Fluc vs MyD88
AFAP1L2	10:116054582-116164515	Fluc	MyD88	3.21326	1.70338	-0.915637	0.0002	0.0083258	yes	Fluc vs MyD88
C5orf4	5:154198051-154230213	Fluc	MyD88	0.827727	0.253508	-1.70712	0.0002	0.0083258	yes	Fluc vs MyD88
CALHM2	10:105206542-105212162	Fluc	MyD88	5.08941	2.73267	-0.89719	0.0002	0.0083258	yes	Fluc vs MyD88
CD248	11:66081957-66084515	Fluc	MyD88	4.63689	2.52876	-0.874727	0.0002	0.0083258	yes	Fluc vs MyD88
CDH24	14:23516269-23526747	Fluc	MyD88	8.96645	5.093	-0.816019	0.0002	0.0083258	yes	Fluc vs MyD88
DENND2A	7:140218219-140302342	Fluc	MyD88	3.6341	6.32082	0.798513	0.0002	0.0083258	yes	Fluc vs MyD88
DOCK4	7:111366163-111846462	Fluc	MyD88	1.53024	2.61394	0.772471	0.0002	0.0083258	yes	Fluc vs MyD88
DST	6:56322784-56507694	Fluc	MyD88	9.80735	6.09321	-0.68666	0.0002	0.0083258	yes	Fluc vs MyD88
FAM115C	7:143318044-143427173	Fluc	MyD88	5.0318	2.91416	-0.787993	0.0002	0.0083258	yes	Fluc vs MyD88
KCNN4	19:44270684-44285409	Fluc	MyD88	1.12558	0.16686	-2.75396	0.0002	0.0083258	yes	Fluc vs MyD88
LIN7A	12:81191170-81331694	Fluc	MyD88	10.441	5.83121	-0.840394	0.0002	0.0083258	yes	Fluc vs MyD88
PANX1	11:93862093-93915138	Fluc	MyD88	17.0888	27.5875	0.69096	0.0002	0.0083258	yes	Fluc vs MyD88
PKP3	11:394216-404908	Fluc	MyD88	5.17329	2.87974	-0.845143	0.0002	0.0083258	yes	Fluc vs MyD88
PMAIP1	18:57567191-57571538	Fluc	MyD88	19.953	32.3798	0.698488	0.0002	0.0083258	yes	Fluc vs MyD88
SLC44A2	19:10713120-10755235	Fluc	MyD88	42.0039	26.2806	-0.676528	0.0002	0.0083258	yes	Fluc vs MyD88
ARL4C	2:235401684-235405693	Fluc	MyD88	10.8577	17.8996	0.721201	0.00025	0.00999951	yes	Fluc vs MyD88
ATOH8	2:85980908-86018506	Fluc	MyD88	0.995062	0.484879	-1.03716	0.00025	0.00999951	yes	Fluc vs MyD88
CGA	6:87795215-87804865	Fluc	MyD88	6.22382	2.39823	-1.37583	0.00025	0.00999951	yes	Fluc vs MyD88
CORO2A	9:100883256-100954956	Fluc	MyD88	2.11628	1.18295	-0.839142	0.00025	0.00999951	yes	Fluc vs MyD88
CRABP2	1:156669397-156675608	Fluc	MyD88	8.59005	4.34733	-0.982536	0.00025	0.00999951	yes	Fluc vs MyD88
EDIL3	5:83238125-83680611	Fluc	MyD88	67.1049	42.2464	-0.66759	0.00025	0.00999951	yes	Fluc vs MyD88
EEF1A2	20:62119364-62130668	Fluc	MyD88	23.8436	14.4773	-0.719805	0.00025	0.00999951	yes	Fluc vs MyD88
EVA1A	2:75719443-75796848	Fluc	MyD88	10.2851	17.4433	0.762108	0.00025	0.00999951	yes	Fluc vs MyD88
FAM46B	1:27331510-27339333	Fluc	MyD88	7.3413	4.146	-0.824315	0.00025	0.00999951	yes	Fluc vs MyD88
KIAA1199	15:81071711-81243999	Fluc	MyD88	15.6047	25.5097	0.709066	0.00025	0.00999951	yes	Fluc vs MyD88
MBNL2	13:97874549-98046374	Fluc	MyD88	9.64446	5.91377	-0.705623	0.00025	0.00999951	yes	Fluc vs MyD88
PALM	19:708952-748330	Fluc	MyD88	3.94624	2.20898	-0.8371	0.00025	0.00999951	yes	Fluc vs MyD88
PLEKHG4	16:67311412-67360661	Fluc	MyD88	4.45774	2.52254	-0.821434	0.00025	0.00999951	yes	Fluc vs MyD88
PRR16	5:119800018-120022965	Fluc	MyD88	9.84499	5.5338	-0.831119	0.00025	0.00999951	yes	Fluc vs MyD88
RUNX1T1	8:92967194-93115454	Fluc	MyD88	1.57642	0.868683	-0.859754	0.00025	0.00999951	yes	Fluc vs MyD88
SAMD4A	14:55034329-55260033	Fluc	MyD88	5.56366	8.89649	0.677203	0.00025	0.00999951	yes	Fluc vs MyD88
SDK1	7:3341079-4308632	Fluc	MyD88	1.15461	0.612885	-0.913724	0.00025	0.00999951	yes	Fluc vs MyD88
SERPINB8	18:61637262-61656608	Fluc	MyD88	5.05427	9.14457	0.855413	0.00025	0.00999951	yes	Fluc vs MyD88
ALDH1A3	15:101420008-101456831	Fluc	MyD88	5.75045	9.88137	0.781035	0.0003	0.0116181	yes	Fluc vs MyD88
BCAM	19:45312315-45324678	Fluc	MyD88	22.0003	13.7692	-0.676078	0.0003	0.0116181	yes	Fluc vs MyD88
CDYL2	16:80637674-80838175	Fluc	MyD88	2.23935	1.09675	-1.02984	0.0003	0.0116181	yes	Fluc vs MyD88
CXCL12	10:44865604-44880545	Fluc	MyD88	267.913	141.745	-0.918467	0.0003	0.0116181	yes	Fluc vs MyD88
FAP	2:163027199-163100045	Fluc	MyD88	3.21893	5.56	0.788501	0.0003	0.0116181	yes	Fluc vs MyD88
GAL3ST4	7:99756864-99766373	Fluc	MyD88	2.86725	1.43275	-1.00088	0.0003	0.0116181	yes	Fluc vs MyD88
GDF15	19:18496967-18499986	Fluc	MyD88	5.19688	2.37534	-1.12951	0.0003	0.0116181	yes	Fluc vs MyD88
GPR126	6:142623055-142767403	Fluc	MyD88	11.0964	6.97968	-0.668862	0.0003	0.0116181	yes	Fluc vs MyD88
KIRREL3	11:126293395-126870766	Fluc	MyD88	3.09401	1.63887	-0.916781	0.0003	0.0116181	yes	Fluc vs MyD88
LMNA	1:156052368-156109880	Fluc	MyD88	230.877	145.761	-0.663515	0.0003	0.0116181	yes	Fluc vs MyD88
2015-09-04	17:56597610-56618179	Fluc	MyD88	3.206	1.71045	-0.906397	0.0003	0.0116181	yes	Fluc vs MyD88
TAF4B	18:23806408-23971649	Fluc	MyD88	2.53822	4.40127	0.794099	0.0003	0.0116181	yes	Fluc vs MyD88
ALDH3B1	11:67776047-67796743	Fluc	MyD88	3.25726	1.73979	-0.904748	0.00035	0.0131821	yes	Fluc vs MyD88
CES3	16:66995131-67009052	Fluc	MyD88	0.614234	0.188382	-1.70513	0.00035	0.0131821	yes	Fluc vs MyD88
CLMP	11:122943019-123066007	Fluc	MyD88	5.81359	9.5421	0.714877	0.00035	0.0131821	yes	Fluc vs MyD88
FTH1	11:61717355-61735132	Fluc	MyD88	921.258	1429.19	0.633524	0.00035	0.0131821	yes	Fluc vs MyD88
GCHFR	15:41056284-41059911	Fluc	MyD88	5.05692	1.89116	-1.41899	0.00035	0.0131821	yes	Fluc vs MyD88
IRF1	5:131817300-131826465	Fluc	MyD88	2.93716	5.00683	0.769475	0.00035	0.0131821	yes	Fluc vs MyD88
ISG20	15:89182038-89198879	Fluc	MyD88	1.43513	3.51083	1.29063	0.00035	0.0131821	yes	Fluc vs MyD88
KSR1	17:25799035-25950718	Fluc	MyD88	2.438	4.12022	0.757021	0.00035	0.0131821	yes	Fluc vs MyD88
LAMA5	20:60884120-60942368	Fluc	MyD88	2.72723	1.56839	-0.798152	0.00035	0.0131821	yes	Fluc vs MyD88
MIAT	22:27053445-27072441	Fluc	MyD88	0.700926	0.375637	-0.899922	0.00035	0.0131821	yes	Fluc vs MyD88
RABGGTB	1:76251885-76260764	Fluc	MyD88	50.0904	76.9719	0.619798	0.00035	0.0131821	yes	Fluc vs MyD88
ABCD1	X:152990322-153010216	Fluc	MyD88	2.78689	1.52191	-0.872775	0.0004	0.0146977	yes	Fluc vs MyD88
APLN	X:128779235-128788933	Fluc	MyD88	3.39564	1.93449	-0.811728	0.0004	0.0146977	yes	Fluc vs MyD88
CARD10	22:37886399-37915210	Fluc	MyD88	16.4673	10.6598	-0.627421	0.0004	0.0146977	yes	Fluc vs MyD88
CDKN1A	6:36644236-36655116	Fluc	MyD88	65.6309	41.422	-0.663979	0.0004	0.0146977	yes	Fluc vs MyD88
DAB2	5:39371775-39425335	Fluc	MyD88	16.0325	10.2103	-0.65097	0.0004	0.0146977	yes	Fluc vs MyD88
DPYD	1:97543298-98386615	Fluc	MyD88	11.7207	6.76693	-0.79249	0.0004	0.0146977	yes	Fluc vs MyD88
HES1	3:193853930-193856401	Fluc	MyD88	27.2634	16.0218	-0.766931	0.0004	0.0146977	yes	Fluc vs MyD88
HOPX	4:57514153-57547872	Fluc	MyD88	3.03924	1.26188	-1.26813	0.0004	0.0146977	yes	Fluc vs MyD88
MIR17HG	13:92000073-92006829	Fluc	MyD88	0.542116	1.36349	1.33063	0.0004	0.0146977	yes	Fluc vs MyD88
MXRA8	1:1288070-1293915	Fluc	MyD88	27.0056	17.0826	-0.660733	0.0004	0.0146977	yes	Fluc vs MyD88
NEFM	8:24771273-24776606	Fluc	MyD88	1.77334	3.09509	0.803509	0.0004	0.0146977	yes	Fluc vs MyD88
PBX1	1:164528596-164821067	Fluc	MyD88	6.1898	3.81553	-0.69801	0.0004	0.0146977	yes	Fluc vs MyD88
SLC16A9	10:61410521-61469649	Fluc	MyD88	2.74971	4.87902	0.827314	0.0004	0.0146977	yes	Fluc vs MyD88
BCL2A1	15:80253231-80263643	Fluc	MyD88	0.179148	3.88876	4.44009	0.00045	0.0161622	yes	Fluc vs MyD88
CALB2	16:71392615-71424341	Fluc	MyD88	1.42192	2.86265	1.00951	0.00045	0.0161622	yes	Fluc vs MyD88
CCDC71L	7:106297210-106301634	Fluc	MyD88	4.59957	7.51086	0.707479	0.00045	0.0161622	yes	Fluc vs MyD88
CCDC80	3:112323406-112359977	Fluc	MyD88	414.447	263.495	-0.65341	0.00045	0.0161622	yes	Fluc vs MyD88
IGFBP2	2:217498126-217529159	Fluc	MyD88	3.89691	1.82697	-1.09287	0.00045	0.0161622	yes	Fluc vs MyD88
KCNG1	20:49620192-49639675	Fluc	MyD88	15.3472	25.5137	0.733293	0.00045	0.0161622	yes	Fluc vs MyD88
LPPR3	19:812487-821952	Fluc	MyD88	1.5486	0.642132	-1.27003	0.00045	0.0161622	yes	Fluc vs MyD88
MET	7:116312458-116438440	Fluc	MyD88	27.5691	17.8058	-0.630704	0.00045	0.0161622	yes	Fluc vs MyD88
RALA	7:39663151-39747723	Fluc	MyD88	43.3912	66.892	0.62443	0.00045	0.0161622	yes	Fluc vs MyD88
S100A10	1:151955385-151966714	Fluc	MyD88	207.663	132.929	-0.643584	0.00045	0.0161622	yes	Fluc vs MyD88
SRGAP2B	1:143915747-144094477	Fluc	MyD88	9.71755	5.33722	-0.864506	0.00045	0.0161622	yes	Fluc vs MyD88
TRAF1	9:123664670-123691451	Fluc	MyD88	0.518841	1.07714	1.05385	0.00045	0.0161622	yes	Fluc vs MyD88
ASAP3	1:23755055-23810750	Fluc	MyD88	9.01219	5.59308	-0.688234	0.0005	0.0175599	yes	Fluc vs MyD88
B4GALNT4	11:369794-382117	Fluc	MyD88	19.5962	12.0801	-0.697938	0.0005	0.0175599	yes	Fluc vs MyD88
EHD2	19:48216600-48246391	Fluc	MyD88	53.8568	34.3443	-0.649059	0.0005	0.0175599	yes	Fluc vs MyD88
FAT3	11:92085261-92629636	Fluc	MyD88	1.90459	1.17067	-0.702145	0.0005	0.0175599	yes	Fluc vs MyD88
FRMD6	14:51921229-52197445	Fluc	MyD88	77.9682	121.062	0.634786	0.0005	0.0175599	yes	Fluc vs MyD88
LOC100652766	6:56535285-56708082	Fluc	MyD88	3.67645	1.67241	-1.13639	0.0005	0.0175599	yes	Fluc vs MyD88
NEURL1B	5:172068275-172118543	Fluc	MyD88	2.72641	1.61075	-0.759269	0.0005	0.0175599	yes	Fluc vs MyD88
PKNOX2	11:125034558-125303285	Fluc	MyD88	0.13017	0.460538	1.82292	0.0005	0.0175599	yes	Fluc vs MyD88
REEP2	5:137774775-137782658	Fluc	MyD88	4.37315	2.48154	-0.817437	0.0005	0.0175599	yes	Fluc vs MyD88
S100A6	1:153507075-153508717	Fluc	MyD88	319.201	204.837	-0.639988	0.0005	0.0175599	yes	Fluc vs MyD88
SLCO2A1	3:133651539-133748920	Fluc	MyD88	0.610439	0.197072	-1.63112	0.0005	0.0175599	yes	Fluc vs MyD88
TMCC2	1:205197037-205242471	Fluc	MyD88	2.65749	1.54132	-0.785895	0.0005	0.0175599	yes	Fluc vs MyD88
FLT1	13:28874482-29069265	Fluc	MyD88	1.82771	3.29869	0.851854	0.00055	0.0189129	yes	Fluc vs MyD88
FRMPD3	X:106765679-106848479	Fluc	MyD88	0.662005	0.321135	-1.04366	0.00055	0.0189129	yes	Fluc vs MyD88
GAS2L3	12:100967488-101018690	Fluc	MyD88	6.33366	3.70904	-0.771994	0.00055	0.0189129	yes	Fluc vs MyD88
ZNF395	8:28203101-28243977	Fluc	MyD88	21.9694	14.1147	-0.638301	0.00055	0.0189129	yes	Fluc vs MyD88
FAM19A5	22:48885287-49147744	Fluc	MyD88	3.17139	1.77271	-0.839159	0.0006	0.0202906	yes	Fluc vs MyD88
GPRC5A	12:13043955-13066600	Fluc	MyD88	7.23131	4.26044	-0.763256	0.0006	0.0202906	yes	Fluc vs MyD88
TMEM40	3:12775391-12800808	Fluc	MyD88	1.0801	0.248295	-2.12104	0.0006	0.0202906	yes	Fluc vs MyD88
CDK6	7:92234234-92465941	Fluc	MyD88	8.19935	12.6249	0.622685	0.00065	0.0216107	yes	Fluc vs MyD88
CTHRC1	8:104383742-104395233	Fluc	MyD88	11.6386	19.0124	0.708023	0.00065	0.0216107	yes	Fluc vs MyD88
ETS2	21:40177230-40196879	Fluc	MyD88	17.8819	27.3613	0.61364	0.00065	0.0216107	yes	Fluc vs MyD88
MAP3K14	17:43325302-43394414	Fluc	MyD88	13.732	8.71438	-0.656076	0.00065	0.0216107	yes	Fluc vs MyD88
MDGA1	6:37600283-37665766	Fluc	MyD88	1.74583	1.04697	-0.737689	0.00065	0.0216107	yes	Fluc vs MyD88
RPS6KA6	X:83313353-83442943	Fluc	MyD88	2.94054	1.78036	-0.723915	0.00065	0.0216107	yes	Fluc vs MyD88
NBEAL2	3:47021172-47051194	Fluc	MyD88	1.99145	1.19348	-0.73864	0.0007	0.0229046	yes	Fluc vs MyD88
NUAK2	1:205271190-205290883	Fluc	MyD88	4.5959	7.48543	0.703737	0.0007	0.0229046	yes	Fluc vs MyD88
PPP3CC	8:22298482-22398657	Fluc	MyD88	6.16069	10.102	0.713472	0.0007	0.0229046	yes	Fluc vs MyD88
PRSS12	4:119201192-119273922	Fluc	MyD88	4.46114	2.69532	-0.726955	0.0007	0.0229046	yes	Fluc vs MyD88
RIN1	11:66099541-66104000	Fluc	MyD88	21.0652	13.5176	-0.640026	0.0007	0.0229046	yes	Fluc vs MyD88
UNC5C	4:96083654-96470361	Fluc	MyD88	0.584421	0.305423	-0.9362	0.0007	0.0229046	yes	Fluc vs MyD88
WT1	11:32409320-32457081	Fluc	MyD88	0.65488	1.39136	1.0872	0.0007	0.0229046	yes	Fluc vs MyD88
CPT1C	19:50194364-50216988	Fluc	MyD88	9.5382	5.96963	-0.676075	0.00075	0.024189	yes	Fluc vs MyD88
DDX58	9:32455299-32526322	Fluc	MyD88	2.16242	3.54321	0.712407	0.00075	0.024189	yes	Fluc vs MyD88
HEG1	3:124684553-124774802	Fluc	MyD88	32.8661	21.5295	-0.610284	0.00075	0.024189	yes	Fluc vs MyD88
PDLIM4	5:131593350-131609147	Fluc	MyD88	17.1045	26.2652	0.618775	0.00075	0.024189	yes	Fluc vs MyD88
DUSP10	1:221874763-221915516	Fluc	MyD88	8.26069	13.1689	0.672798	0.0008	0.0253901	yes	Fluc vs MyD88
FZD8	10:35927176-35930362	Fluc	MyD88	6.97929	11.0308	0.66038	0.0008	0.0253901	yes	Fluc vs MyD88
PAOX	10:135192740-135205198	Fluc	MyD88	2.63998	1.30488	-1.01661	0.0008	0.0253901	yes	Fluc vs MyD88
PDE4C	19:18318770-18359010	Fluc	MyD88	0.628676	0.298827	-1.07301	0.0008	0.0253901	yes	Fluc vs MyD88
PLEKHH3	17:40819931-40829048	Fluc	MyD88	7.17225	4.31727	-0.732306	0.0008	0.0253901	yes	Fluc vs MyD88
SERPINB7	18:61420280-61472610	Fluc	MyD88	9.08048	14.5797	0.683119	0.0008	0.0253901	yes	Fluc vs MyD88
ST6GAL2	2:107418055-107503563	Fluc	MyD88	15.8387	10.3875	-0.608604	0.0008	0.0253901	yes	Fluc vs MyD88
ZBTB38	3:141043054-141168634	Fluc	MyD88	11.4497	17.3614	0.600579	0.0008	0.0253901	yes	Fluc vs MyD88
AR	X:66763873-66950461	Fluc	MyD88	0.486547	0.240401	-1.01714	0.00085	0.0266068	yes	Fluc vs MyD88
LDB2	4:16503163-16900424	Fluc	MyD88	1.89322	1.00015	-0.920629	0.00085	0.0266068	yes	Fluc vs MyD88
OPTN	10:13142081-13180276	Fluc	MyD88	4.63257	7.35668	0.667242	0.00085	0.0266068	yes	Fluc vs MyD88
TGFBI	5:135364583-135399507	Fluc	MyD88	1286.16	824.347	-0.641748	0.00085	0.0266068	yes	Fluc vs MyD88
C15orf48	15:45722726-45725647	Fluc	MyD88	0.22687	8.02917	5.14531	0.0009	0.0278237	yes	Fluc vs MyD88
CBX7	22:39526776-39548538	Fluc	MyD88	2.17116	1.19901	-0.856618	0.0009	0.0278237	yes	Fluc vs MyD88
COMMD8	4:47452814-47465676	Fluc	MyD88	8.96468	14.604	0.704041	0.0009	0.0278237	yes	Fluc vs MyD88
DOK5	20:53092265-53267710	Fluc	MyD88	3.13025	1.65981	-0.915261	0.0009	0.0278237	yes	Fluc vs MyD88
ENPP2	8:120569316-120651106	Fluc	MyD88	5.78486	3.45795	-0.742367	0.0009	0.0278237	yes	Fluc vs MyD88
INHBB	2:121103718-121109383	Fluc	MyD88	40.4597	26.5566	-0.607416	0.0009	0.0278237	yes	Fluc vs MyD88
OSBPL10	3:31702316-32033228	Fluc	MyD88	1.27531	0.686196	-0.894155	0.0009	0.0278237	yes	Fluc vs MyD88
SMPD3	16:68392229-68482409	Fluc	MyD88	0.811279	0.389186	-1.05974	0.0009	0.0278237	yes	Fluc vs MyD88
TP53I3	2:24300302-24308085	Fluc	MyD88	22.2766	14.0276	-0.667264	0.0009	0.0278237	yes	Fluc vs MyD88
ARID3B	15:74833547-74890472	Fluc	MyD88	2.17081	1.25411	-0.791571	0.00095	0.0289903	yes	Fluc vs MyD88
GBP1	1:89517986-89531043	Fluc	MyD88	5.0117	7.87446	0.65188	0.00095	0.0289903	yes	Fluc vs MyD88
LINC00654	20:5479217-5485242	Fluc	MyD88	2.79359	1.62593	-0.780854	0.00095	0.0289903	yes	Fluc vs MyD88
SAMD10	20:62605465-62610995	Fluc	MyD88	1.61697	0.688897	-1.23093	0.00095	0.0289903	yes	Fluc vs MyD88
ACO1	9:32384600-32450834	Fluc	MyD88	23.2614	35.0024	0.589518	0.001	0.0301504	yes	Fluc vs MyD88
BAMBI	10:28966423-28971868	Fluc	MyD88	4.48445	7.45684	0.733635	0.001	0.0301504	yes	Fluc vs MyD88
DENND3	8:142138719-142205901	Fluc	MyD88	1.21007	0.6563	-0.882663	0.001	0.0301504	yes	Fluc vs MyD88
NPAS2	2:101436612-101613287	Fluc	MyD88	0.640726	1.27161	0.988877	0.001	0.0301504	yes	Fluc vs MyD88
SCN4B	11:118004091-118023630	Fluc	MyD88	0.737325	0.340856	-1.11314	0.001	0.0301504	yes	Fluc vs MyD88
TMEFF2	2:192814742-193059644	Fluc	MyD88	3.77817	2.09331	-0.8519	0.001	0.0301504	yes	Fluc vs MyD88
TNFAIP2	14:103592663-103603776	Fluc	MyD88	0.22234	0.612636	1.46226	0.001	0.0301504	yes	Fluc vs MyD88
HERC4	10:69681655-69835103	Fluc	MyD88	30.1175	19.9608	-0.593431	0.00105	0.0312853	yes	Fluc vs MyD88
HOXD3	2:177028804-177037826	Fluc	MyD88	1.65042	0.737735	-1.16166	0.00105	0.0312853	yes	Fluc vs MyD88
RNF145	5:158584416-158637061	Fluc	MyD88	38.4968	56.9585	0.565172	0.00105	0.0312853	yes	Fluc vs MyD88
S1PR1	1:101702304-101707076	Fluc	MyD88	6.17934	3.78742	-0.706237	0.00105	0.0312853	yes	Fluc vs MyD88
ACAP3	1:1227763-1243269	Fluc	MyD88	10.1203	6.42466	-0.655563	0.0011	0.0324563	yes	Fluc vs MyD88
CAPG	2:85621870-85641197	Fluc	MyD88	33.8946	21.9006	-0.630086	0.0011	0.0324563	yes	Fluc vs MyD88
MAFB	20:39314514-39317876	Fluc	MyD88	0.892945	0.379703	-1.2337	0.0011	0.0324563	yes	Fluc vs MyD88
NABP1	2:192542797-192553248	Fluc	MyD88	6.01809	9.39074	0.641933	0.0011	0.0324563	yes	Fluc vs MyD88
NDRG4	16:58497548-58547523	Fluc	MyD88	2.51828	1.43226	-0.814142	0.00115	0.0336036	yes	Fluc vs MyD88
ADD3	10:111705316-111895323	Fluc	MyD88	15.6308	10.4439	-0.581741	0.0012	0.034716	yes	Fluc vs MyD88
CHST2	3:142838617-142842856	Fluc	MyD88	2.19379	3.57814	0.705786	0.0012	0.034716	yes	Fluc vs MyD88
GNG2	14:52327021-52436518	Fluc	MyD88	4.81689	2.95868	-0.703146	0.0012	0.034716	yes	Fluc vs MyD88
JUP	17:39910858-39942964	Fluc	MyD88	1.61968	0.857584	-0.917356	0.0012	0.034716	yes	Fluc vs MyD88
NYNRIN	14:24867991-24888494	Fluc	MyD88	1.41566	0.835372	-0.760987	0.0012	0.034716	yes	Fluc vs MyD88
PPFIA4	1:203020310-203047864	Fluc	MyD88	4.74163	2.93776	-0.690666	0.0012	0.034716	yes	Fluc vs MyD88
TRIM6	11:5617330-5665628	Fluc	MyD88	1.48342	0.728839	-1.02525	0.0012	0.034716	yes	Fluc vs MyD88
VCAM1	1:101185195-101204601	Fluc	MyD88	0.145164	0.455074	1.64842	0.0012	0.034716	yes	Fluc vs MyD88
ALPL	1:21835857-21904905	Fluc	MyD88	0.466514	1.06778	1.19462	0.00125	0.0358101	yes	Fluc vs MyD88
CDK17	12:96672038-96794366	Fluc	MyD88	10.6097	16.2029	0.610865	0.00125	0.0358101	yes	Fluc vs MyD88
GSTA4	6:52842745-52860178	Fluc	MyD88	6.37577	3.64222	-0.807783	0.00125	0.0358101	yes	Fluc vs MyD88
ITGAV	2:187454789-187545628	Fluc	MyD88	17.4452	26.0931	0.580839	0.00125	0.0358101	yes	Fluc vs MyD88
MEIS2	15:37183221-37393500	Fluc	MyD88	56.4013	37.8431	-0.575698	0.00125	0.0358101	yes	Fluc vs MyD88
MEIS3	19:47906374-47922785	Fluc	MyD88	18.6697	11.9476	-0.64398	0.00125	0.0358101	yes	Fluc vs MyD88
MGC16121	X:133677406-133680741	Fluc	MyD88	5.63027	2.62067	-1.10327	0.00125	0.0358101	yes	Fluc vs MyD88
SYTL2	11:85405263-85522178	Fluc	MyD88	17.9397	11.3408	-0.66164	0.00125	0.0358101	yes	Fluc vs MyD88
CRAT	9:131857072-131873070	Fluc	MyD88	19.6294	12.7424	-0.623378	0.0013	0.0369125	yes	Fluc vs MyD88
LAMC2	1:183155173-183214262	Fluc	MyD88	0.477958	0.883106	0.885702	0.0013	0.0369125	yes	Fluc vs MyD88
BEGAIN	14:101003483-101036131	Fluc	MyD88	0.953357	0.386254	-1.30347	0.00135	0.0379618	yes	Fluc vs MyD88
BMP4	14:54416453-54423554	Fluc	MyD88	0.839247	0.237882	-1.81885	0.00135	0.0379618	yes	Fluc vs MyD88
C1R	12:7241204-7245043	Fluc	MyD88	12.6401	20.0111	0.662792	0.00135	0.0379618	yes	Fluc vs MyD88
CDH4	20:59827481-60515673	Fluc	MyD88	3.64678	2.30921	-0.659223	0.00135	0.0379618	yes	Fluc vs MyD88
FAM83G	17:18853988-18950336	Fluc	MyD88	9.2665	6.01875	-0.622561	0.00135	0.0379618	yes	Fluc vs MyD88
GATA2	3:128198264-128212030	Fluc	MyD88	25.6741	16.7552	-0.615705	0.00135	0.0379618	yes	Fluc vs MyD88
NACC2	9:138898382-138987131	Fluc	MyD88	11.1979	7.24841	-0.627493	0.00135	0.0379618	yes	Fluc vs MyD88
PLEKHA2	8:38758752-38831431	Fluc	MyD88	12.5196	8.09857	-0.628446	0.00135	0.0379618	yes	Fluc vs MyD88
TSC22D1	13:45006278-45154568	Fluc	MyD88	19.5182	29.7602	0.608559	0.00135	0.0379618	yes	Fluc vs MyD88
FAM60A	12:31433517-31479159	Fluc	MyD88	20.2659	30.7705	0.602496	0.0014	0.0390113	yes	Fluc vs MyD88
IL6ST	5:55230922-55290821	Fluc	MyD88	22.084	32.6645	0.564721	0.0014	0.0390113	yes	Fluc vs MyD88
SOD3	4:24797084-24802467	Fluc	MyD88	2.52074	1.10732	-1.18677	0.0014	0.0390113	yes	Fluc vs MyD88
TLN2	15:62939509-63136830	Fluc	MyD88	4.93296	3.23461	-0.608861	0.0014	0.0390113	yes	Fluc vs MyD88
CTIF	18:46065426-46389588	Fluc	MyD88	15.4255	10.2019	-0.596474	0.00145	0.0400614	yes	Fluc vs MyD88
KCNE1	21:35818985-35884573	Fluc	MyD88	0.540198	0.219024	-1.3024	0.00145	0.0400614	yes	Fluc vs MyD88
NFIX	19:13106583-13209610	Fluc	MyD88	18.3246	12.263	-0.579467	0.00145	0.0400614	yes	Fluc vs MyD88
IGFBP5	2:217536827-217560272	Fluc	MyD88	9.50574	6.20769	-0.614742	0.0015	0.0410701	yes	Fluc vs MyD88
MALL	2:110841446-110874143	Fluc	MyD88	0.762424	0.307821	-1.3085	0.0015	0.0410701	yes	Fluc vs MyD88
SMAD9	13:37418967-37494409	Fluc	MyD88	2.32981	1.38643	-0.748837	0.0015	0.0410701	yes	Fluc vs MyD88
AIM1	6:106959729-107018335	Fluc	MyD88	15.5347	10.3146	-0.590806	0.00155	0.0420942	yes	Fluc vs MyD88
APOBEC3C	22:39410264-39414843	Fluc	MyD88	22.3166	13.9959	-0.673117	0.00155	0.0420942	yes	Fluc vs MyD88
ARHGAP18	6:129898239-130031370	Fluc	MyD88	7.75208	11.8231	0.608948	0.00155	0.0420942	yes	Fluc vs MyD88
BTBD2	19:1985446-2015702	Fluc	MyD88	37.8169	24.7429	-0.612016	0.00155	0.0420942	yes	Fluc vs MyD88
ENO2	12:7023613-7032859	Fluc	MyD88	53.6809	36.2846	-0.565052	0.00155	0.0420942	yes	Fluc vs MyD88
B3GNT5	3:182895830-183145855	Fluc	MyD88	2.09416	3.38644	0.693397	0.00165	0.0441361	yes	Fluc vs MyD88
MIRLET7BHG	22:46481876-46509808	Fluc	MyD88	0.573646	0.260548	-1.13861	0.00165	0.0441361	yes	Fluc vs MyD88
PDCD1LG2	9:5510544-5571282	Fluc	MyD88	5.03343	7.99011	0.666674	0.00165	0.0441361	yes	Fluc vs MyD88
TP53I11	11:44785975-44972857	Fluc	MyD88	15.4823	10.0088	-0.629358	0.00165	0.0441361	yes	Fluc vs MyD88
GPR87	3:150804675-151176497	Fluc	MyD88	4.01684	1.0158	-1.98345	0.0017	0.0451447	yes	Fluc vs MyD88
LOC646999	7:39649085-39651687	Fluc	MyD88	0.234359	0.692558	1.56321	0.0017	0.0451447	yes	Fluc vs MyD88
TNFRSF11B	8:119935795-119964383	Fluc	MyD88	1.18303	2.17409	0.877922	0.0017	0.0451447	yes	Fluc vs MyD88
ARHGAP22	10:49654067-49864310	Fluc	MyD88	7.55791	11.5242	0.608608	0.00175	0.0461302	yes	Fluc vs MyD88
CLDN11	3:170136652-170152479	Fluc	MyD88	96.7854	141.002	0.542855	0.00175	0.0461302	yes	Fluc vs MyD88
IFITM2	11:308106-309410	Fluc	MyD88	55.5141	35.8292	-0.631716	0.00175	0.0461302	yes	Fluc vs MyD88
KLHL4	X:86772714-86925050	Fluc	MyD88	1.28757	0.656568	-0.971633	0.00175	0.0461302	yes	Fluc vs MyD88
TSPAN10	17:79609348-79615779	Fluc	MyD88	1.48483	0.470259	-1.65877	0.00175	0.0461302	yes	Fluc vs MyD88
HSPB1	7:75931874-75933614	Fluc	MyD88	231.975	154.999	-0.58171	0.0018	0.0471057	yes	Fluc vs MyD88
LOC100507439	8:37278926-37351431	Fluc	MyD88	14.3332	22.7637	0.667371	0.0018	0.0471057	yes	Fluc vs MyD88
ZSWIM4	19:13906273-13943044	Fluc	MyD88	2.71664	4.35776	0.681765	0.0018	0.0471057	yes	Fluc vs MyD88
NYAP1	7:100081549-100092422	Fluc	MyD88	0.702055	0.321091	-1.1286	0.00185	0.0480497	yes	Fluc vs MyD88
QPRT	16:29690440-29709315	Fluc	MyD88	4.95478	2.83097	-0.807524	0.00185	0.0480497	yes	Fluc vs MyD88
TM4SF1	3:149086804-149095568	Fluc	MyD88	8.52874	13.4477	0.656953	0.00185	0.0480497	yes	Fluc vs MyD88
DIEXF	1:210001311-210030910	Fluc	MyD88	3.45519	5.30734	0.619224	0.0019	0.0489987	yes	Fluc vs MyD88
HR	8:21971931-21988565	Fluc	MyD88	1.10333	0.604662	-0.867663	0.0019	0.0489987	yes	Fluc vs MyD88
KLF3	4:38614321-38703129	Fluc	MyD88	4.00645	6.10921	0.608663	0.0019	0.0489987	yes	Fluc vs MyD88
RCAN3	1:24822822-24863510	Fluc	MyD88	4.49556	2.77378	-0.696647	0.0019	0.0489987	yes	Fluc vs MyD88
SAT1	X:23801274-23804327	Fluc	MyD88	40.2915	60.4334	0.584872	0.0019	0.0489987	yes	Fluc vs MyD88
SLC46A3	13:29274216-29293150	Fluc	MyD88	2.39386	3.93807	0.718147	0.0019	0.0489987	yes	Fluc vs MyD88
SPSB1	1:9352940-9429591	Fluc	MyD88	6.24743	9.76395	0.644202	0.0019	0.0489987	yes	Fluc vs MyD88
ST3GAL5	2:86066270-86116157	Fluc	MyD88	15.9129	10.3837	-0.615867	0.00195	0.0499404	yes	Fluc vs MyD88
TRIM2	4:154074269-154260474	Fluc	MyD88	3.04877	1.95329	-0.642318	0.00195	0.0499404	yes	Fluc vs MyD88
TUBD1	17:57936839-57970306	Fluc	MyD88	3.57105	5.74797	0.686705	0.00195	0.0499404	yes	Fluc vs MyD88
BDNF	11:27528398-27743605	Fluc	MyD88	11.6109	7.59493	-0.612377	0.002	0.0508692	no	Fluc vs MyD88
CADM4	19:44126521-44143991	Fluc	MyD88	7.16369	4.46763	-0.681192	0.002	0.0508692	no	Fluc vs MyD88
GADD45B	19:2476122-2478257	Fluc	MyD88	48.52	32.1479	-0.593857	0.002	0.0508692	no	Fluc vs MyD88
IRS2	13:110406183-110438914	Fluc	MyD88	5.45278	3.56602	-0.612677	0.002	0.0508692	no	Fluc vs MyD88
NEXN	1:78347032-78409580	Fluc	MyD88	12.858	19.0797	0.569375	0.002	0.0508692	no	Fluc vs MyD88
RARG	12:53604349-53626040	Fluc	MyD88	12.9631	8.57401	-0.596369	0.002	0.0508692	no	Fluc vs MyD88
RPF2	6:111303290-111346794	Fluc	MyD88	49.5884	74.8414	0.593833	0.002	0.0508692	no	Fluc vs MyD88
ADAMTS12	5:33527285-33892124	Fluc	MyD88	3.34935	5.14763	0.620028	0.00205	0.0518143	no	Fluc vs MyD88
EHD3	2:31456879-31491260	Fluc	MyD88	7.60873	5.00126	-0.605364	0.00205	0.0518143	no	Fluc vs MyD88
OSR1	2:19551245-19558372	Fluc	MyD88	1.92534	0.943571	-1.02891	0.00205	0.0518143	no	Fluc vs MyD88
SMARCD3	7:150936058-150974231	Fluc	MyD88	7.33455	4.48224	-0.710489	0.00205	0.0518143	no	Fluc vs MyD88
SYNE1	6:152442818-152958534	Fluc	MyD88	1.499	0.974747	-0.620903	0.00205	0.0518143	no	Fluc vs MyD88
TP53INP1	8:95938199-95961615	Fluc	MyD88	2.99068	1.87404	-0.674322	0.00205	0.0518143	no	Fluc vs MyD88
EPAS1	2:46524540-46613842	Fluc	MyD88	21.6651	31.6924	0.548761	0.0021	0.0527772	no	Fluc vs MyD88
SLFN11	17:33677323-33700720	Fluc	MyD88	9.97126	6.61825	-0.591325	0.0021	0.0527772	no	Fluc vs MyD88
CACNA1A	19:13317255-13617274	Fluc	MyD88	2.41024	1.54022	-0.646043	0.00215	0.0537354	no	Fluc vs MyD88
IL28RA	1:24480646-24513765	Fluc	MyD88	0.617234	0.299181	-1.0448	0.00215	0.0537354	no	Fluc vs MyD88
NHS	X:17393542-17754114	Fluc	MyD88	1.03257	0.616848	-0.743252	0.00215	0.0537354	no	Fluc vs MyD88
TUBB4A	19:6494329-6502330	Fluc	MyD88	0.937585	0.374077	-1.32562	0.00215	0.0537354	no	Fluc vs MyD88
ZNF267	16:31885078-31928629	Fluc	MyD88	4.23808	6.4959	0.616119	0.00215	0.0537354	no	Fluc vs MyD88
GSTM2	1:110210643-110226619	Fluc	MyD88	14.3398	9.00855	-0.670659	0.0022	0.0546673	no	Fluc vs MyD88
NAGS	17:42082031-42086436	Fluc	MyD88	1.55261	0.721417	-1.10579	0.00225	0.0555916	no	Fluc vs MyD88
NQO1	16:69743303-69760533	Fluc	MyD88	32.6475	22.2868	-0.550782	0.00225	0.0555916	no	Fluc vs MyD88
SNORA25	11:93463678-93463812	Fluc	MyD88	0	27.7168	Inf	0.00225	0.0555916	no	Fluc vs MyD88
LOC100507347	10:17256244-17268897	Fluc	MyD88	0.458922	1.25764	1.4544	0.0023	0.0565071	no	Fluc vs MyD88
SYNM	15:99645285-99675800	Fluc	MyD88	6.07326	4.07201	-0.576729	0.0023	0.0565071	no	Fluc vs MyD88
DNER	2:230222344-230579286	Fluc	MyD88	0.282179	0.709427	1.33004	0.00235	0.0574272	no	Fluc vs MyD88
PLXNA3	X:153686622-153701985	Fluc	MyD88	6.84366	4.4772	-0.61217	0.00235	0.0574272	no	Fluc vs MyD88
SLC7A2	8:17354596-17428077	Fluc	MyD88	1.62441	2.54294	0.646585	0.00235	0.0574272	no	Fluc vs MyD88
SNORD3A	17:19091328-19091545	Fluc	MyD88	25.3696	52.928	1.06093	0.0024	0.0582927	no	Fluc vs MyD88
EBF1	5:158122922-158526788	Fluc	MyD88	1.63553	0.979916	-0.739027	0.00245	0.0592129	no	Fluc vs MyD88
FBLN2	3:13590624-13679922	Fluc	MyD88	67.9845	46.227	-0.55647	0.00245	0.0592129	no	Fluc vs MyD88
FLOT1	6:30695510-30710453	Fluc	MyD88	75.8382	51.4369	-0.56012	0.00245	0.0592129	no	Fluc vs MyD88
FRMD4A	10:13685705-14372866	Fluc	MyD88	5.18703	7.7448	0.578319	0.00245	0.0592129	no	Fluc vs MyD88
INSIG1	7:155089485-155101945	Fluc	MyD88	23.6324	34.7008	0.554205	0.00245	0.0592129	no	Fluc vs MyD88
ARSI	5:149675908-149682525	Fluc	MyD88	19.7819	28.9798	0.550864	0.0025	0.060065	no	Fluc vs MyD88
CAND2	3:12838170-12876313	Fluc	MyD88	1.76452	1.03332	-0.771989	0.0025	0.060065	no	Fluc vs MyD88
PSG5	19:43671894-43690688	Fluc	MyD88	3.46076	1.95198	-0.826147	0.0025	0.060065	no	Fluc vs MyD88
CNTNAP3B	9:43684884-43922476	Fluc	MyD88	1.93162	1.20314	-0.683007	0.00255	0.0609309	no	Fluc vs MyD88
FARP1	13:98795433-99102023	Fluc	MyD88	13.1602	8.85101	-0.572271	0.00255	0.0609309	no	Fluc vs MyD88
QPCT	2:37571752-37600465	Fluc	MyD88	1.80086	3.21003	0.833902	0.00255	0.0609309	no	Fluc vs MyD88
CCDC92	12:124420954-124457163	Fluc	MyD88	10.3288	6.61679	-0.642475	0.0026	0.0617874	no	Fluc vs MyD88
HOXB3	17:46626231-46651810	Fluc	MyD88	7.33262	4.78077	-0.617088	0.0026	0.0617874	no	Fluc vs MyD88
HSPA4L	4:128703452-128754522	Fluc	MyD88	1.69892	0.982948	-0.789434	0.0026	0.0617874	no	Fluc vs MyD88
RMND5B	5:177558027-177575479	Fluc	MyD88	6.77362	4.21335	-0.68496	0.0026	0.0617874	no	Fluc vs MyD88
CDK15	2:202671151-202760273	Fluc	MyD88	2.59337	1.58155	-0.713486	0.00265	0.0626346	no	Fluc vs MyD88
STOM	9:124101265-124132582	Fluc	MyD88	53.9521	37.1523	-0.53823	0.00265	0.0626346	no	Fluc vs MyD88
TIFA	4:113196781-113207059	Fluc	MyD88	2.60839	4.2026	0.688121	0.00265	0.0626346	no	Fluc vs MyD88
ZNF853	7:6655526-6663921	Fluc	MyD88	2.65225	1.6334	-0.699338	0.00265	0.0626346	no	Fluc vs MyD88
ALX4	11:44282277-44331716	Fluc	MyD88	0.58416	0.28879	-1.01634	0.0027	0.0634832	no	Fluc vs MyD88
GPR162	12:6930962-6936583	Fluc	MyD88	2.87131	1.64693	-0.80193	0.0027	0.0634832	no	Fluc vs MyD88
ARHGAP33	19:36266416-36279724	Fluc	MyD88	5.15236	3.28899	-0.64759	0.00275	0.0643088	no	Fluc vs MyD88
DOPEY2	21:37536838-37666572	Fluc	MyD88	3.16667	2.03318	-0.639231	0.00275	0.0643088	no	Fluc vs MyD88
PTGER2	14:52781015-52795324	Fluc	MyD88	8.87666	5.71128	-0.636203	0.00275	0.0643088	no	Fluc vs MyD88
PXDN	2:1635658-1748291	Fluc	MyD88	43.8929	63.9574	0.543121	0.00275	0.0643088	no	Fluc vs MyD88
CDC42EP2	11:65082288-65089900	Fluc	MyD88	9.2156	14.16	0.619674	0.0028	0.0651664	no	Fluc vs MyD88
PDLIM1	10:96997328-97050781	Fluc	MyD88	93.1598	63.892	-0.544073	0.0028	0.0651664	no	Fluc vs MyD88
UCP2	11:73685715-73693889	Fluc	MyD88	13.4745	8.51071	-0.662881	0.0028	0.0651664	no	Fluc vs MyD88
FMNL3	12:50017196-50101197	Fluc	MyD88	6.24121	9.34026	0.581638	0.00285	0.0660193	no	Fluc vs MyD88
PIDD	11:799178-805250	Fluc	MyD88	9.52066	6.19879	-0.619075	0.00285	0.0660193	no	Fluc vs MyD88
WNK4	17:40932648-40949084	Fluc	MyD88	4.9932	3.2013	-0.641305	0.00285	0.0660193	no	Fluc vs MyD88
FLNC	7:128470482-128499328	Fluc	MyD88	105.901	72.3825	-0.549009	0.0029	0.0668554	no	Fluc vs MyD88
RIPK2	8:90769974-90803292	Fluc	MyD88	6.42267	9.82857	0.613809	0.0029	0.0668554	no	Fluc vs MyD88
SIM1	6:100836749-100911551	Fluc	MyD88	0.67748	0.323053	-1.06841	0.0029	0.0668554	no	Fluc vs MyD88
VAT1L	16:77822482-78014001	Fluc	MyD88	19.969	13.6109	-0.553001	0.0029	0.0668554	no	Fluc vs MyD88
CIT	12:120123594-120315095	Fluc	MyD88	9.69465	6.62705	-0.548822	0.00295	0.0677124	no	Fluc vs MyD88
DMD	X:31137344-33357726	Fluc	MyD88	2.71097	4.27991	0.65877	0.00295	0.0677124	no	Fluc vs MyD88
PANX2	22:50609159-50618724	Fluc	MyD88	2.20476	1.28604	-0.777685	0.00295	0.0677124	no	Fluc vs MyD88
CD109	6:74405507-74538041	Fluc	MyD88	6.05759	4.09812	-0.563784	0.003	0.0685493	no	Fluc vs MyD88
SSH3	11:67070918-67080078	Fluc	MyD88	9.79715	6.50231	-0.59141	0.003	0.0685493	no	Fluc vs MyD88
AKAP5	14:64932216-64941221	Fluc	MyD88	1.06844	0.638162	-0.743512	0.00305	0.0693823	no	Fluc vs MyD88
LOC100506303	14:19656203-19663457	Fluc	MyD88	1.22148	2.33538	0.935024	0.00305	0.0693823	no	Fluc vs MyD88
NECAB3	20:32244892-32262264	Fluc	MyD88	12.3881	8.00932	-0.6292	0.00305	0.0693823	no	Fluc vs MyD88
TNFRSF14	1:2487207-2495268	Fluc	MyD88	1.24244	0.511856	-1.27937	0.00305	0.0693823	no	Fluc vs MyD88
LOC440297	15:82753446-82798323	Fluc	MyD88	2.64555	1.59388	-0.73103	0.0031	0.0702042	no	Fluc vs MyD88
WDR89	14:64063756-64108641	Fluc	MyD88	6.0285	8.99034	0.576577	0.00315	0.0709945	no	Fluc vs MyD88
ANXA2P2	9:33624222-33625532	Fluc	MyD88	11.1214	7.10175	-0.647096	0.0032	0.0718489	no	Fluc vs MyD88
PADI3	1:17575592-17610728	Fluc	MyD88	0.510919	0.197827	-1.36885	0.0032	0.0718489	no	Fluc vs MyD88
SPHK1	17:74380689-74383941	Fluc	MyD88	48.9054	71.9631	0.557263	0.0032	0.0718489	no	Fluc vs MyD88
INHBE	12:57849095-57851791	Fluc	MyD88	0.127332	0.491174	1.94764	0.00325	0.0726626	no	Fluc vs MyD88
KCNQ5	6:73331570-73908574	Fluc	MyD88	4.91774	3.26656	-0.590224	0.00325	0.0726626	no	Fluc vs MyD88
L1CAM	X:153126970-153141399	Fluc	MyD88	9.33964	6.3267	-0.561914	0.00325	0.0726626	no	Fluc vs MyD88
SLC12A8	3:124801479-124931609	Fluc	MyD88	2.04189	1.21942	-0.743709	0.00325	0.0726626	no	Fluc vs MyD88
CDC42EP3	2:37869024-37899678	Fluc	MyD88	25.4296	17.4534	-0.543004	0.0033	0.0734236	no	Fluc vs MyD88
IFITM1	11:313990-315272	Fluc	MyD88	13.4867	8.01997	-0.749867	0.0033	0.0734236	no	Fluc vs MyD88
MYLK	3:123304402-123603149	Fluc	MyD88	32.849	22.0631	-0.57421	0.0033	0.0734236	no	Fluc vs MyD88
CXorf69	X:134124967-134126503	Fluc	MyD88	3.92846	2.31413	-0.763498	0.00335	0.0742445	no	Fluc vs MyD88
IFNGR1	6:137518620-137540567	Fluc	MyD88	12.3453	18.5238	0.585415	0.00335	0.0742445	no	Fluc vs MyD88
KIAA0664L3	16:31711933-31718758	Fluc	MyD88	0.974703	0.416773	-1.2257	0.00335	0.0742445	no	Fluc vs MyD88
CMBL	5:10277706-10308168	Fluc	MyD88	3.20765	2.04004	-0.652924	0.0034	0.0750358	no	Fluc vs MyD88
PREX1	20:47240792-47444420	Fluc	MyD88	3.29909	2.16492	-0.607757	0.0034	0.0750358	no	Fluc vs MyD88
PTBP2	1:97187174-97280605	Fluc	MyD88	10.6397	15.7127	0.56247	0.0034	0.0750358	no	Fluc vs MyD88
SNHG16	17:74553845-74561430	Fluc	MyD88	32.244	46.9068	0.540766	0.00345	0.0758263	no	Fluc vs MyD88
FAM13C	10:60936347-61122661	Fluc	MyD88	1.16967	0.611056	-0.936726	0.0035	0.0766162	no	Fluc vs MyD88
PLAUR	19:44150246-44174498	Fluc	MyD88	44.5364	64.7122	0.539052	0.0035	0.0766162	no	Fluc vs MyD88
AMPH	7:38423296-38671167	Fluc	MyD88	3.97943	2.54807	-0.643154	0.00355	0.0774254	no	Fluc vs MyD88
CSF1R	5:149432853-149492935	Fluc	MyD88	0.434864	0.84165	0.952657	0.00355	0.0774254	no	Fluc vs MyD88
TBX3	12:115108058-115121969	Fluc	MyD88	15.1238	21.906	0.534505	0.00355	0.0774254	no	Fluc vs MyD88
EPS8	12:15773074-15942510	Fluc	MyD88	10.196	6.9056	-0.562166	0.0036	0.0782108	no	Fluc vs MyD88
FAM167A	8:11197145-11324276	Fluc	MyD88	2.45524	3.81714	0.63663	0.0036	0.0782108	no	Fluc vs MyD88
KIAA0284	14:105331649-105363107	Fluc	MyD88	13.017	8.93339	-0.543115	0.0036	0.0782108	no	Fluc vs MyD88
VEGFA	6:43737945-43754224	Fluc	MyD88	28.0575	40.3932	0.525728	0.0036	0.0782108	no	Fluc vs MyD88
CHST11	12:104850691-105155792	Fluc	MyD88	3.69514	5.55236	0.587472	0.00365	0.0789882	no	Fluc vs MyD88
LGR4	11:27387507-27494334	Fluc	MyD88	9.93068	6.76146	-0.554557	0.00365	0.0789882	no	Fluc vs MyD88
FOS	14:75745480-75748937	Fluc	MyD88	3.84894	2.33128	-0.723337	0.0037	0.0797676	no	Fluc vs MyD88
PIK3CD	1:9711789-9884550	Fluc	MyD88	5.35753	18.6764	1.80158	0.0037	0.0797676	no	Fluc vs MyD88
EBF2	8:25699245-25902640	Fluc	MyD88	1.18969	0.700163	-0.764824	0.00375	0.0805209	no	Fluc vs MyD88
LAMP5	20:9495004-9511171	Fluc	MyD88	1.00478	0.413023	-1.28258	0.00375	0.0805209	no	Fluc vs MyD88
KRT7	12:52626953-52642709	Fluc	MyD88	0.6779	1.40972	1.05627	0.0038	0.0812458	no	Fluc vs MyD88
LRRC15	3:194075975-194090472	Fluc	MyD88	0.644105	1.08978	0.758665	0.0038	0.0812458	no	Fluc vs MyD88
SLC38A4	12:46781529-47268854	Fluc	MyD88	0.653427	0.212776	-1.61869	0.0038	0.0812458	no	Fluc vs MyD88
ABHD5	3:43732374-43764217	Fluc	MyD88	4.41661	6.55675	0.570043	0.00385	0.0819768	no	Fluc vs MyD88
CHRM2	7:136553398-136849088	Fluc	MyD88	0.642782	0.290781	-1.1444	0.00385	0.0819768	no	Fluc vs MyD88
PTPRJ	11:48002109-48192394	Fluc	MyD88	8.77421	5.98532	-0.551841	0.00385	0.0819768	no	Fluc vs MyD88
SLC9A3R2	16:2076868-2089027	Fluc	MyD88	14.4909	9.56798	-0.598863	0.00385	0.0819768	no	Fluc vs MyD88
APOBEC3G	22:39473009-39483748	Fluc	MyD88	1.04679	0.469317	-1.15734	0.0039	0.0827387	no	Fluc vs MyD88
ATP10D	4:47487409-47595503	Fluc	MyD88	3.10437	2.06802	-0.586053	0.0039	0.0827387	no	Fluc vs MyD88
CXADRP3	18:14477950-14498705	Fluc	MyD88	1.06232	0.427914	-1.31183	0.00395	0.0834992	no	Fluc vs MyD88
SPEG	2:220299699-220358354	Fluc	MyD88	7.68351	4.17388	-0.880374	0.00395	0.0834992	no	Fluc vs MyD88
TNK2	3:195590235-195638128	Fluc	MyD88	6.21497	4.10702	-0.597656	0.00395	0.0834992	no	Fluc vs MyD88
IL22RA1	1:24446260-24469775	Fluc	MyD88	0.753256	0.341374	-1.14179	0.004	0.0842149	no	Fluc vs MyD88
KIAA1456	8:12803182-12887286	Fluc	MyD88	0.444171	0.249773	-0.830496	0.004	0.0842149	no	Fluc vs MyD88
KLHL26	19:18747837-18781302	Fluc	MyD88	2.39568	1.42016	-0.75438	0.00405	0.084929	no	Fluc vs MyD88
EPHA2	1:16450831-16482582	Fluc	MyD88	38.074	26.6599	-0.514138	0.0041	0.0856772	no	Fluc vs MyD88
ETS1	11:128328655-128457453	Fluc	MyD88	63.0049	89.8018	0.51128	0.0041	0.0856772	no	Fluc vs MyD88
CACNA2D3	3:54156692-55108584	Fluc	MyD88	0.293722	0.628513	1.09749	0.00415	0.0863802	no	Fluc vs MyD88
FAM131C	1:16384263-16400127	Fluc	MyD88	1.02628	0.394495	-1.37934	0.00415	0.0863802	no	Fluc vs MyD88
RASSF7	11:560970-564025	Fluc	MyD88	8.90452	5.67051	-0.651058	0.00415	0.0863802	no	Fluc vs MyD88
SYT15	10:46955443-46970601	Fluc	MyD88	4.43292	2.47411	-0.841346	0.00415	0.0863802	no	Fluc vs MyD88
TMEM51	1:15479027-15546974	Fluc	MyD88	9.02693	13.5646	0.587534	0.00415	0.0863802	no	Fluc vs MyD88
OASL	12:121458094-121477045	Fluc	MyD88	4.09391	6.35839	0.635183	0.0042	0.0871263	no	Fluc vs MyD88
PTRF	17:40554466-40575338	Fluc	MyD88	409.82	282.406	-0.53722	0.0042	0.0871263	no	Fluc vs MyD88
GPR1	2:207040039-207082771	Fluc	MyD88	0.653674	0.239288	-1.44983	0.00425	0.087861	no	Fluc vs MyD88
MR1	1:181002560-181031074	Fluc	MyD88	0.60085	0.345264	-0.799303	0.00425	0.087861	no	Fluc vs MyD88
ITPR3	6:33589155-33664351	Fluc	MyD88	14.2797	9.85858	-0.53451	0.0043	0.0886184	no	Fluc vs MyD88
C1QL1	17:43037060-43045644	Fluc	MyD88	3.67056	2.01456	-0.865534	0.00435	0.0893111	no	Fluc vs MyD88
GAS7	17:9813925-10101868	Fluc	MyD88	1.59179	1.03415	-0.622202	0.00435	0.0893111	no	Fluc vs MyD88
AFF3	2:100163714-100759037	Fluc	MyD88	2.60285	1.72551	-0.593065	0.0045	0.0914797	no	Fluc vs MyD88
DGKA	12:56324945-56347807	Fluc	MyD88	6.77217	4.53229	-0.579378	0.0045	0.0914797	no	Fluc vs MyD88
TRIB1	8:126442562-126450645	Fluc	MyD88	5.63192	8.37145	0.571851	0.0045	0.0914797	no	Fluc vs MyD88
RGS3	9:116207010-116360018	Fluc	MyD88	12.2201	18.0724	0.564537	0.00455	0.0921676	no	Fluc vs MyD88
CD59	11:33724555-33758025	Fluc	MyD88	70.244	100.328	0.51428	0.0046	0.0929055	no	Fluc vs MyD88
ERMP1	9:5784571-5833081	Fluc	MyD88	0.391113	0.708697	0.857584	0.0046	0.0929055	no	Fluc vs MyD88
MRPS36	5:68513572-68525985	Fluc	MyD88	22.9763	33.4929	0.543707	0.0046	0.0929055	no	Fluc vs MyD88
PLCL2	3:16974581-17132098	Fluc	MyD88	1.22081	1.94092	0.668899	0.0046	0.0929055	no	Fluc vs MyD88
CCL26	7:75398841-75419064	Fluc	MyD88	2.9002	0.888623	-1.70651	0.00465	0.0936434	no	Fluc vs MyD88
PHF17	4:129730778-129796379	Fluc	MyD88	6.8871	4.67015	-0.560427	0.0047	0.0943084	no	Fluc vs MyD88
SALL2	14:21989230-22005337	Fluc	MyD88	3.55339	2.318	-0.616312	0.0047	0.0943084	no	Fluc vs MyD88
EGR3	8:22545173-22550815	Fluc	MyD88	0.512731	0.236613	-1.11567	0.00475	0.0949865	no	Fluc vs MyD88
MX2	21:42733949-42780869	Fluc	MyD88	0.658273	1.19201	0.856632	0.00475	0.0949865	no	Fluc vs MyD88
PMP22	17:15133095-15168644	Fluc	MyD88	23.9324	16.2604	-0.557608	0.00475	0.0949865	no	Fluc vs MyD88
WDR63	1:85527992-85598821	Fluc	MyD88	0.444359	0.163828	-1.43954	0.00475	0.0949865	no	Fluc vs MyD88
ARHGAP23	17:36584719-36668628	Fluc	MyD88	19.022	13.2956	-0.516723	0.0048	0.0956866	no	Fluc vs MyD88
CASZ1	1:10696660-10856733	Fluc	MyD88	1.07062	0.593627	-0.850817	0.0048	0.0956866	no	Fluc vs MyD88
GALNT10	5:153570294-153825382	Fluc	MyD88	23.8236	16.76	-0.507371	0.0048	0.0956866	no	Fluc vs MyD88
CETN3	5:89689527-89705603	Fluc	MyD88	31.7898	45.9215	0.530605	0.00485	0.0963153	no	Fluc vs MyD88
GPC1	2:241375114-241407495	Fluc	MyD88	35.2122	24.6481	-0.5146	0.00485	0.0963153	no	Fluc vs MyD88
NXNL2	9:91150015-91190704	Fluc	MyD88	0.986996	0.169954	-2.5379	0.00485	0.0963153	no	Fluc vs MyD88
RSL24D1	15:55473511-55489231	Fluc	MyD88	78.4354	112.59	0.521499	0.00485	0.0963153	no	Fluc vs MyD88
CYFIP2	5:156693090-156822606	Fluc	MyD88	2.00322	1.30054	-0.623213	0.0049	0.0970042	no	Fluc vs MyD88
MAP3K8	10:30722949-30750762	Fluc	MyD88	0.307071	0.654033	1.09079	0.0049	0.0970042	no	Fluc vs MyD88
SCARA3	8:27491576-27534286	Fluc	MyD88	34.233	23.7013	-0.530425	0.0049	0.0970042	no	Fluc vs MyD88
SERPINB9	6:2887498-2903546	Fluc	MyD88	2.15821	1.33624	-0.691658	0.0049	0.0970042	no	Fluc vs MyD88
LHFPL2	5:77781037-77944648	Fluc	MyD88	14.4988	20.7722	0.518725	0.00495	0.0977295	no	Fluc vs MyD88
MAGI1	3:65339905-66024509	Fluc	MyD88	2.70621	1.8162	-0.575348	0.00495	0.0977295	no	Fluc vs MyD88
NINL	20:25433336-25566153	Fluc	MyD88	4.31849	2.91415	-0.567449	0.00495	0.0977295	no	Fluc vs MyD88
PTPN12	7:77166772-77269388	Fluc	MyD88	21.0098	30.0589	0.516731	0.00495	0.0977295	no	Fluc vs MyD88
ULBP1	6:150285142-150294846	Fluc	MyD88	4.16294	2.73486	-0.606138	0.00495	0.0977295	no	Fluc vs MyD88
SLC2A6	9:136336215-136344276	Fluc	MyD88	9.27471	13.7002	0.562823	0.00505	0.0991524	no	Fluc vs MyD88
HSPA1B	6:31795511-31798031	Fluc	MyD88	95.547	67.3399	-0.504749	0.00515	0.100553	no	Fluc vs MyD88
ALS2CL	3:46710484-46735194	Fluc	MyD88	0.659801	0.345831	-0.931967	0.0052	0.101242	no	Fluc vs MyD88
CORO1A	16:30194730-30200397	Fluc	MyD88	10.6821	7.07153	-0.595106	0.0052	0.101242	no	Fluc vs MyD88
RPS6KA2	6:166822853-167275771	Fluc	MyD88	1.00853	0.609327	-0.72697	0.00525	0.101926	no	Fluc vs MyD88
DUSP8	11:1575280-1593150	Fluc	MyD88	0.511214	0.957334	0.905094	0.0053	0.102587	no	Fluc vs MyD88
SLC19A2	1:169433146-169455208	Fluc	MyD88	3.5852	5.42351	0.597172	0.0053	0.102587	no	Fluc vs MyD88
SLC22A4	5:131630144-131731306	Fluc	MyD88	1.22036	2.72306	1.15792	0.00535	0.103237	no	Fluc vs MyD88
USP43	17:9548853-9633004	Fluc	MyD88	0.706673	1.20063	0.764674	0.00535	0.103237	no	Fluc vs MyD88
FAM108C1	15:80987651-81047962	Fluc	MyD88	12.859	18.8267	0.549998	0.0054	0.103951	no	Fluc vs MyD88
PROS1	3:93591880-93692934	Fluc	MyD88	2.77699	1.78777	-0.635362	0.0054	0.103951	no	Fluc vs MyD88
CXXC5	5:139028300-139062680	Fluc	MyD88	23.6301	15.9891	-0.563537	0.00545	0.104631	no	Fluc vs MyD88
ABCA2	9:139901685-139931234	Fluc	MyD88	9.0256	6.28076	-0.523084	0.0055	0.105303	no	Fluc vs MyD88
C1orf106	1:200860626-200884864	Fluc	MyD88	0.320063	0.645431	1.0119	0.0055	0.105303	no	Fluc vs MyD88
GAS5	1:173832385-173837125	Fluc	MyD88	135.303	192.486	0.508559	0.0055	0.105303	no	Fluc vs MyD88
SAP30	4:174292092-174298683	Fluc	MyD88	26.2325	17.9301	-0.548969	0.0055	0.105303	no	Fluc vs MyD88
TRERF1	6:42192668-42419783	Fluc	MyD88	3.9889	2.69655	-0.564874	0.0055	0.105303	no	Fluc vs MyD88
PFKL	21:45719924-45747261	Fluc	MyD88	103.904	74.2954	-0.48391	0.00555	0.105992	no	Fluc vs MyD88
ENY2	8:110346551-110358189	Fluc	MyD88	50.3949	71.7434	0.509568	0.0056	0.106659	no	Fluc vs MyD88
C10orf54	10:73156690-73575704	Fluc	MyD88	1.2002	0.67856	-0.822727	0.00565	0.107284	no	Fluc vs MyD88
SFXN3	10:102790995-102800998	Fluc	MyD88	12.1494	8.2399	-0.560186	0.0057	0.107931	no	Fluc vs MyD88
FAM200B	4:15683351-15692070	Fluc	MyD88	3.38066	5.00902	0.567222	0.0059	0.11051	no	Fluc vs MyD88
MIB2	1:1550794-1565990	Fluc	MyD88	12.8157	8.78425	-0.544924	0.0059	0.11051	no	Fluc vs MyD88
PPME1	11:73882367-73965748	Fluc	MyD88	110.715	78.9034	-0.488695	0.0059	0.11051	no	Fluc vs MyD88
RALGDS	9:135973106-136024588	Fluc	MyD88	15.0511	10.3839	-0.535519	0.0059	0.11051	no	Fluc vs MyD88
APOE	19:45409038-45412650	Fluc	MyD88	9.41185	6.02823	-0.642745	0.00595	0.111194	no	Fluc vs MyD88
TCEA3	1:23707554-23751261	Fluc	MyD88	1.5267	0.828707	-0.881484	0.00595	0.111194	no	Fluc vs MyD88
DOCK5	8:25042286-25270619	Fluc	MyD88	5.12178	3.52736	-0.538058	0.006	0.11184	no	Fluc vs MyD88
SEC11C	18:56807124-56826064	Fluc	MyD88	36.21	52.9136	0.547251	0.006	0.11184	no	Fluc vs MyD88
IER5L	9:131937830-131940540	Fluc	MyD88	13.2115	9.00395	-0.553167	0.00605	0.112483	no	Fluc vs MyD88
LOC151009	2:111132685-111142113	Fluc	MyD88	0.421928	0.134357	-1.65093	0.00605	0.112483	no	Fluc vs MyD88
GFPT2	5:179727699-179780315	Fluc	MyD88	27.9037	39.3798	0.497001	0.0061	0.113134	no	Fluc vs MyD88
LRRC20	10:72058728-72142382	Fluc	MyD88	8.52298	5.77778	-0.560843	0.0061	0.113134	no	Fluc vs MyD88
TFPI	2:188328956-188419219	Fluc	MyD88	11.0506	17.6288	0.673816	0.0061	0.113134	no	Fluc vs MyD88
XKR9	8:71581599-71648177	Fluc	MyD88	0.291712	0.620487	1.08886	0.0061	0.113134	no	Fluc vs MyD88
DBP	19:49133816-49140639	Fluc	MyD88	1.94854	0.99791	-0.965409	0.00615	0.113751	no	Fluc vs MyD88
SAPCD2	9:139956578-139965028	Fluc	MyD88	16.9909	11.8363	-0.521549	0.00615	0.113751	no	Fluc vs MyD88
RFX2	19:5978413-6110664	Fluc	MyD88	2.09633	1.31594	-0.671774	0.0062	0.114384	no	Fluc vs MyD88
FCRLA	1:161676761-161684142	Fluc	MyD88	0.481799	1.00099	1.05492	0.00625	0.115056	no	Fluc vs MyD88
MFSD2A	1:40420783-40435628	Fluc	MyD88	10.5551	15.2768	0.533399	0.00625	0.115056	no	Fluc vs MyD88
CDC42BPG	11:64591660-64612041	Fluc	MyD88	0.662946	0.365211	-0.860163	0.0063	0.115717	no	Fluc vs MyD88
KBTBD8	3:67048726-67061634	Fluc	MyD88	1.10139	1.72958	0.651087	0.0063	0.115717	no	Fluc vs MyD88
LRRC3DN	21:45879819-45882079	Fluc	MyD88	2.29258	1.33464	-0.780518	0.0063	0.115717	no	Fluc vs MyD88
KIAA1644	22:44639556-44708731	Fluc	MyD88	2.10345	3.08764	0.553743	0.00635	0.116366	no	Fluc vs MyD88
NEK7	1:198126107-198291550	Fluc	MyD88	46.3512	32.886	-0.49513	0.00635	0.116366	no	Fluc vs MyD88
BLVRB	19:40953690-40971725	Fluc	MyD88	20.3782	13.5789	-0.585652	0.0064	0.116981	no	Fluc vs MyD88
FNDC4	2:27714749-27718126	Fluc	MyD88	4.26679	2.64043	-0.692378	0.0064	0.116981	no	Fluc vs MyD88
ALG3	3:183948316-183967313	Fluc	MyD88	33.0472	47.6943	0.529287	0.00645	0.117611	no	Fluc vs MyD88
NPDC1	9:139933908-139940676	Fluc	MyD88	14.7679	9.83984	-0.585758	0.00645	0.117611	no	Fluc vs MyD88
SLC2A3	12:8071823-8088892	Fluc	MyD88	17.3784	12.1017	-0.52208	0.00645	0.117611	no	Fluc vs MyD88
CHST3	10:73724119-73773322	Fluc	MyD88	12.9163	9.13265	-0.500087	0.0065	0.118251	no	Fluc vs MyD88
LSM5	7:32524944-32534870	Fluc	MyD88	28.4914	40.5101	0.507756	0.0065	0.118251	no	Fluc vs MyD88
PLBD2	12:113796370-113827458	Fluc	MyD88	15.2161	10.5856	-0.523492	0.00655	0.118867	no	Fluc vs MyD88
THBS1	15:39873279-39889668	Fluc	MyD88	172.308	244.155	0.502806	0.00655	0.118867	no	Fluc vs MyD88
ADRA2A	10:112836789-112840665	Fluc	MyD88	0.754541	0.370868	-1.02469	0.0066	0.119463	no	Fluc vs MyD88
PCDHB13	5:140593508-140596993	Fluc	MyD88	1.20948	0.6937	-0.802004	0.0066	0.119463	no	Fluc vs MyD88
IKBKE	1:206643585-206670223	Fluc	MyD88	1.10708	1.80157	0.702504	0.00665	0.120099	no	Fluc vs MyD88
CASP3	4:185548849-185570629	Fluc	MyD88	16.545	23.564	0.510191	0.00675	0.12139	no	Fluc vs MyD88
MAB21L1	13:35516423-36246874	Fluc	MyD88	4.83099	2.86622	-0.753167	0.00675	0.12139	no	Fluc vs MyD88
PXN	12:120639093-120703574	Fluc	MyD88	82.1599	58.475	-0.490614	0.0068	0.122004	no	Fluc vs MyD88
RHEBL1	12:49458467-49463775	Fluc	MyD88	4.37531	6.96425	0.670584	0.0068	0.122004	no	Fluc vs MyD88
TCEB1	8:74857372-74884522	Fluc	MyD88	56.5461	79.4994	0.491517	0.0068	0.122004	no	Fluc vs MyD88
PYROXD2	10:100143321-100174978	Fluc	MyD88	3.54933	2.22622	-0.67295	0.0069	0.12314	no	Fluc vs MyD88
RPS17L	15:83205503-83209208	Fluc	MyD88	0.373915	1.9944	2.41517	0.0069	0.12314	no	Fluc vs MyD88
HERC6	4:89299890-89364249	Fluc	MyD88	1.02357	1.61988	0.662279	0.007	0.124359	no	Fluc vs MyD88
PMEPA1	20:56223447-56286592	Fluc	MyD88	7.93894	11.3164	0.511403	0.007	0.124359	no	Fluc vs MyD88
WBSCR27	7:73248919-73256855	Fluc	MyD88	2.28783	1.01667	-1.17013	0.00705	0.124988	no	Fluc vs MyD88
GAR1	4:110736665-110745893	Fluc	MyD88	38.2714	54.1901	0.501764	0.0071	0.125588	no	Fluc vs MyD88
ANKRD30B	18:14748238-14852737	Fluc	MyD88	3.02327	2.04226	-0.565943	0.00715	0.126209	no	Fluc vs MyD88
BPHL	6:3118925-3153432	Fluc	MyD88	5.95778	3.83761	-0.634566	0.00715	0.126209	no	Fluc vs MyD88
FAM91A2	1:149576261-149672733	Fluc	MyD88	0.536029	1.42715	1.41276	0.00715	0.126209	no	Fluc vs MyD88
RGMB	5:98104998-98132198	Fluc	MyD88	47.233	66.1638	0.486247	0.00715	0.126209	no	Fluc vs MyD88
DAAM1	14:59655380-59838123	Fluc	MyD88	6.7124	4.70551	-0.512478	0.0072	0.126809	no	Fluc vs MyD88
FBLN7	2:112895961-112945791	Fluc	MyD88	4.47846	2.83082	-0.661781	0.0072	0.126809	no	Fluc vs MyD88
FYCO1	3:45959390-46037316	Fluc	MyD88	3.86025	2.68275	-0.524979	0.0072	0.126809	no	Fluc vs MyD88
LOC100505501	8:60031833-60033820	Fluc	MyD88	1.9371	0.880363	-1.13773	0.0072	0.126809	no	Fluc vs MyD88
LOC100507474	2:132440057-132442392	Fluc	MyD88	2.51562	5.30379	1.07611	0.0072	0.126809	no	Fluc vs MyD88
LRSAM1	9:130213764-130265780	Fluc	MyD88	5.12174	3.4537	-0.56849	0.00725	0.127409	no	Fluc vs MyD88
MYBL1	8:67474409-67525480	Fluc	MyD88	28.6654	20.4298	-0.488635	0.00725	0.127409	no	Fluc vs MyD88
LOC100271836	16:21458003-21513602	Fluc	MyD88	0.356065	0.634601	0.83371	0.0073	0.127977	no	Fluc vs MyD88
PLAC2	19:5558177-5568005	Fluc	MyD88	0.716263	0.369534	-0.954781	0.0073	0.127977	no	Fluc vs MyD88
MTSS1L	16:70695106-70719954	Fluc	MyD88	40.9321	29.4028	-0.477278	0.00735	0.12858	no	Fluc vs MyD88
BCL3	19:45251977-45263301	Fluc	MyD88	5.79529	8.89233	0.617682	0.0074	0.129124	no	Fluc vs MyD88
MITF	3:69788585-70017488	Fluc	MyD88	2.6182	1.71984	-0.606298	0.00745	0.129698	no	Fluc vs MyD88
ZNF425	7:148799875-148823438	Fluc	MyD88	0.609503	0.301446	-1.01574	0.00745	0.129698	no	Fluc vs MyD88
ATP9A	20:50213313-50384908	Fluc	MyD88	3.96073	2.71925	-0.542558	0.00755	0.130856	no	Fluc vs MyD88
CCL5	17:34198494-34207377	Fluc	MyD88	2.43645	4.09422	0.74881	0.00755	0.130856	no	Fluc vs MyD88
GGH	8:63927637-63951610	Fluc	MyD88	49.8303	70.2611	0.495704	0.00755	0.130856	no	Fluc vs MyD88
IL11RA	9:34652181-34662689	Fluc	MyD88	3.76285	2.31141	-0.703054	0.00755	0.130856	no	Fluc vs MyD88
CLDN12	7:90032647-90045268	Fluc	MyD88	8.80444	12.5582	0.51233	0.0076	0.13144	no	Fluc vs MyD88
CPT1A	11:68522087-68609399	Fluc	MyD88	6.75617	4.67903	-0.529997	0.0076	0.13144	no	Fluc vs MyD88
MANSC1	12:12482217-12503169	Fluc	MyD88	0.611686	0.236768	-1.36932	0.0076	0.13144	no	Fluc vs MyD88
ANXA2	15:60639349-60690185	Fluc	MyD88	1917.44	1343.89	-0.512766	0.00765	0.132083	no	Fluc vs MyD88
IQGAP3	1:156495196-156542396	Fluc	MyD88	14.7707	10.4984	-0.492566	0.00765	0.132083	no	Fluc vs MyD88
GOLGA2P5	12:100550168-100567121	Fluc	MyD88	0.913283	0.485617	-0.911244	0.0077	0.132665	no	Fluc vs MyD88
LYPD1	2:133174146-133429070	Fluc	MyD88	11.3822	7.64254	-0.574656	0.0078	0.133876	no	Fluc vs MyD88
VTN	17:26694297-26697373	Fluc	MyD88	0.593494	0.180708	-1.71557	0.0078	0.133876	no	Fluc vs MyD88
ZMAT4	8:40388108-40755343	Fluc	MyD88	1.27518	0.723549	-0.817534	0.0078	0.133876	no	Fluc vs MyD88
ATP6V1C1	8:104033247-104085285	Fluc	MyD88	10.5098	14.7341	0.487424	0.00785	0.134502	no	Fluc vs MyD88
KIAA0513	16:85061409-85127836	Fluc	MyD88	1.9058	1.27511	-0.579773	0.00785	0.134502	no	Fluc vs MyD88
DPT	1:168664694-168698442	Fluc	MyD88	0.527783	1.08621	1.04129	0.0079	0.135104	no	Fluc vs MyD88
YAF2	12:42550905-42632154	Fluc	MyD88	3.49265	5.08698	0.542488	0.0079	0.135104	no	Fluc vs MyD88
FBXL7	5:15500304-15939900	Fluc	MyD88	7.05922	4.88864	-0.530077	0.00795	0.13571	no	Fluc vs MyD88
UACA	15:70946892-71055850	Fluc	MyD88	35.6152	25.5551	-0.478879	0.00795	0.13571	no	Fluc vs MyD88
LGALS3	14:55595934-55612148	Fluc	MyD88	53.5055	37.3283	-0.519416	0.008	0.136251	no	Fluc vs MyD88
LDLR	19:11200037-11244506	Fluc	MyD88	11.3497	7.99709	-0.505105	0.00805	0.136849	no	Fluc vs MyD88
HHIP	4:145564067-145659881	Fluc	MyD88	3.23362	4.80513	0.571425	0.0081	0.137464	no	Fluc vs MyD88
SHC3	9:91620685-91793682	Fluc	MyD88	0.638467	0.399818	-0.67527	0.0081	0.137464	no	Fluc vs MyD88
ABCC3	17:48712217-48769063	Fluc	MyD88	0.567725	0.262463	-1.11308	0.00815	0.138044	no	Fluc vs MyD88
C3orf52	3:111805181-111837073	Fluc	MyD88	5.31124	7.8639	0.566195	0.0082	0.138622	no	Fluc vs MyD88
FGF2	4:123747862-123844159	Fluc	MyD88	19.5681	27.5483	0.493464	0.0082	0.138622	no	Fluc vs MyD88
PHOSPHO2-KLHL23	2:170550963-170608396	Fluc	MyD88	1.62456	0.570005	-1.511	0.0083	0.139725	no	Fluc vs MyD88
DAPK1	9:90112755-90323549	Fluc	MyD88	1.05426	0.666984	-0.660511	0.00835	0.14029	no	Fluc vs MyD88
FAM59B	2:26395959-26412532	Fluc	MyD88	2.47368	1.58632	-0.640975	0.0084	0.140848	no	Fluc vs MyD88
GABRQ	X:151806636-151821825	Fluc	MyD88	2.01783	1.18615	-0.766519	0.00845	0.141398	no	Fluc vs MyD88
COL6A1	21:47401662-47424963	Fluc	MyD88	515.58	736.29	0.514079	0.00855	0.142495	no	Fluc vs MyD88
EMILIN2	18:2847027-2914090	Fluc	MyD88	0.248717	0.485374	0.964593	0.0086	0.143063	no	Fluc vs MyD88
FIBCD1	9:133777824-133814455	Fluc	MyD88	3.13841	2.00177	-0.64876	0.0086	0.143063	no	Fluc vs MyD88
SDSL	12:113860215-113876081	Fluc	MyD88	5.0422	3.14606	-0.680507	0.00865	0.14363	no	Fluc vs MyD88
TAP2	6:32789609-32806547	Fluc	MyD88	26.7454	38.353	0.520045	0.00865	0.14363	no	Fluc vs MyD88
PARP4	13:24995068-25086948	Fluc	MyD88	8.87287	6.27639	-0.499465	0.0087	0.144174	no	Fluc vs MyD88
FASTKD1	2:170386258-170430424	Fluc	MyD88	6.959	10.0033	0.523525	0.00875	0.144728	no	Fluc vs MyD88
LOC152742	4:14113591-14141676	Fluc	MyD88	0.601384	0.229672	-1.38871	0.00875	0.144728	no	Fluc vs MyD88
COL3A1	2:189839098-189877472	Fluc	MyD88	245.364	345.592	0.494145	0.0088	0.145252	no	Fluc vs MyD88
FAM212B	1:112264685-112310199	Fluc	MyD88	3.97368	1.986	-1.00061	0.0088	0.145252	no	Fluc vs MyD88
EVI5L	19:7895160-7929862	Fluc	MyD88	5.6875	3.88532	-0.549763	0.00885	0.145793	no	Fluc vs MyD88
SNX32	11:65601409-65621172	Fluc	MyD88	0.568712	0.158674	-1.84163	0.0089	0.146307	no	Fluc vs MyD88
STK17B	2:196998306-197036336	Fluc	MyD88	2.20489	3.24573	0.557835	0.009	0.147514	no	Fluc vs MyD88
C5orf46	5:147272270-147286101	Fluc	MyD88	0.528228	2.19422	2.05447	0.00905	0.148036	no	Fluc vs MyD88
CDH13	16:82660398-83830215	Fluc	MyD88	25.3676	39.709	0.64648	0.00905	0.148036	no	Fluc vs MyD88
UBE2B	5:133706869-133727799	Fluc	MyD88	18.9528	26.6391	0.491134	0.0091	0.148542	no	Fluc vs MyD88
KLF13	15:31619082-31670102	Fluc	MyD88	6.60896	9.31271	0.494778	0.0092	0.149592	no	Fluc vs MyD88
POLR3G	5:89770680-89810369	Fluc	MyD88	4.96813	7.176	0.530477	0.0092	0.149592	no	Fluc vs MyD88
UBE2D1	10:60094738-60130513	Fluc	MyD88	10.5107	14.8622	0.499783	0.00925	0.150165	no	Fluc vs MyD88
MYO1C	17:1367479-1396001	Fluc	MyD88	58.3612	42.2088	-0.467467	0.0093	0.150674	no	Fluc vs MyD88
TEX2	17:62224794-62340653	Fluc	MyD88	16.1964	11.6819	-0.471402	0.0093	0.150674	no	Fluc vs MyD88
NDUFA4	7:10971579-10979813	Fluc	MyD88	49.8774	69.3062	0.4746	0.00935	0.151192	no	Fluc vs MyD88
TGFBR2	3:30647993-30735634	Fluc	MyD88	9.99165	14.0158	0.488263	0.0094	0.15171	no	Fluc vs MyD88
NUDCD1	8:110253147-110346350	Fluc	MyD88	13.7938	19.1905	0.476371	0.00945	0.152222	no	Fluc vs MyD88
RNF208	9:140114698-140115775	Fluc	MyD88	1.66025	0.685518	-1.27613	0.00945	0.152222	no	Fluc vs MyD88
HDAC5	17:42154120-42201014	Fluc	MyD88	5.63623	3.92422	-0.522324	0.00955	0.15323	no	Fluc vs MyD88
KANK2	19:11274942-11308243	Fluc	MyD88	19.5428	14.0495	-0.476122	0.00955	0.15323	no	Fluc vs MyD88
PLXNA2	1:208195586-208417665	Fluc	MyD88	1.23297	0.839294	-0.554893	0.00955	0.15323	no	Fluc vs MyD88
CROCC	1:17248444-17299474	Fluc	MyD88	4.21056	2.92418	-0.525983	0.0096	0.153792	no	Fluc vs MyD88
PARP8	5:49961732-50142356	Fluc	MyD88	0.364648	0.599389	0.716988	0.0096	0.153792	no	Fluc vs MyD88
SCNN1D	1:1215815-1227409	Fluc	MyD88	1.96267	1.18868	-0.723467	0.0096	0.153792	no	Fluc vs MyD88
SERPINE1	7:100770369-100782547	Fluc	MyD88	664.684	932.536	0.488491	0.0096	0.153792	no	Fluc vs MyD88
IFIT3	10:91087601-91100725	Fluc	MyD88	9.65218	13.6837	0.503533	0.00965	0.154284	no	Fluc vs MyD88
LOC100506302	7:155434609-155437074	Fluc	MyD88	1.18618	2.10848	0.829872	0.00965	0.154284	no	Fluc vs MyD88
COL6A2	21:47518032-47552763	Fluc	MyD88	591.359	837.927	0.502792	0.0097	0.154791	no	Fluc vs MyD88
MOCOS	18:33767479-33848685	Fluc	MyD88	0.826966	0.441632	-0.904983	0.00975	0.155314	no	Fluc vs MyD88
PEAR1	1:156863522-156886226	Fluc	MyD88	0.662555	0.365909	-0.856556	0.00975	0.155314	no	Fluc vs MyD88
ZBED3	5:76372531-76444176	Fluc	MyD88	0.972086	0.350351	-1.47228	0.0098	0.155818	no	Fluc vs MyD88
MYLIP	6:16129316-16148479	Fluc	MyD88	2.93691	1.91879	-0.614101	0.0099	0.156836	no	Fluc vs MyD88
LOC100132273	22:42486936-42521354	Fluc	MyD88	2.28247	1.32856	-0.780735	0.01005	0.158304	no	Fluc vs MyD88
LOC646021	17:29332139-29361863	Fluc	MyD88	0.967681	0.455385	-1.08745	0.01005	0.158304	no	Fluc vs MyD88
SH3GL3	15:84116090-84287495	Fluc	MyD88	3.03544	4.62897	0.608786	0.01005	0.158304	no	Fluc vs MyD88
SERPINB1	6:2832565-2842283	Fluc	MyD88	1.96537	1.22173	-0.685876	0.0101	0.15879	no	Fluc vs MyD88
ZNF774	15:90895476-90904715	Fluc	MyD88	1.1425	0.598923	-0.931757	0.0101	0.15879	no	Fluc vs MyD88
LYNX1	8:143845755-143859640	Fluc	MyD88	1.26077	0.784186	-0.685034	0.01015	0.159333	no	Fluc vs MyD88
PFDN4	20:52824501-52836492	Fluc	MyD88	59.9872	82.8404	0.46568	0.01015	0.159333	no	Fluc vs MyD88
ZSCAN18	19:58595208-58629793	Fluc	MyD88	1.08287	0.594115	-0.866044	0.01015	0.159333	no	Fluc vs MyD88
NAA38	7:117824085-117844093	Fluc	MyD88	3.26965	4.60302	0.493448	0.0102	0.159848	no	Fluc vs MyD88
OSBPL7	17:45884732-45899147	Fluc	MyD88	3.27354	2.16464	-0.596725	0.0102	0.159848	no	Fluc vs MyD88
RHBDF1	16:108057-122629	Fluc	MyD88	9.87802	6.88053	-0.521701	0.0102	0.159848	no	Fluc vs MyD88
ZBTB7B	1:154975105-154991001	Fluc	MyD88	3.9202	2.64651	-0.566834	0.0102	0.159848	no	Fluc vs MyD88
CYCS	7:25158269-25164980	Fluc	MyD88	64.7576	88.8605	0.456491	0.0103	0.160917	no	Fluc vs MyD88
MRM1	17:34958024-34965407	Fluc	MyD88	6.38726	9.37568	0.553726	0.0103	0.160917	no	Fluc vs MyD88
TSHZ1	18:72922709-73001905	Fluc	MyD88	2.97774	2.02484	-0.55641	0.0103	0.160917	no	Fluc vs MyD88
MGLL	3:127407904-127542093	Fluc	MyD88	7.71568	10.8551	0.492506	0.01035	0.16143	no	Fluc vs MyD88
TBPL1	6:134273307-134308638	Fluc	MyD88	16.3108	23.2143	0.509183	0.01035	0.16143	no	Fluc vs MyD88
TRIM47	17:73870244-73874656	Fluc	MyD88	1.89671	3.0616	0.690782	0.0104	0.162003	no	Fluc vs MyD88
CACNB3	12:49208214-49222726	Fluc	MyD88	14.0492	9.86897	-0.50952	0.0105	0.163012	no	Fluc vs MyD88
LOC100505491	4:145665514-145666423	Fluc	MyD88	0.324787	1.28258	1.98148	0.01055	0.163548	no	Fluc vs MyD88
FAM46A	6:82455446-82462428	Fluc	MyD88	3.78851	2.61471	-0.534978	0.01065	0.164532	no	Fluc vs MyD88
MEG3	14:101292444-101327363	Fluc	MyD88	28.9426	18.5932	-0.63842	0.01065	0.164532	no	Fluc vs MyD88
VCAN	5:82767492-82878122	Fluc	MyD88	0.817084	1.24893	0.612136	0.01065	0.164532	no	Fluc vs MyD88
CEBPB	20:48807119-48809227	Fluc	MyD88	17.1441	24.4294	0.5109	0.0107	0.165024	no	Fluc vs MyD88
ANO4	12:101188373-101522419	Fluc	MyD88	3.07104	2.08403	-0.559355	0.0108	0.166075	no	Fluc vs MyD88
PITPNM3	17:6354582-6459877	Fluc	MyD88	0.757695	0.478973	-0.661674	0.0108	0.166075	no	Fluc vs MyD88
TNS1	2:218664511-218808796	Fluc	MyD88	1.92739	1.34686	-0.517043	0.0108	0.166075	no	Fluc vs MyD88
SPINT1	15:41136245-41149853	Fluc	MyD88	3.74019	2.47032	-0.598413	0.0109	0.167063	no	Fluc vs MyD88
CUEDC1	17:55940336-55980750	Fluc	MyD88	7.21989	4.92503	-0.551844	0.01095	0.167641	no	Fluc vs MyD88
PHLDA3	1:201434606-201438299	Fluc	MyD88	17.9164	12.5611	-0.512314	0.01095	0.167641	no	Fluc vs MyD88
SLC39A6	18:33688493-33709357	Fluc	MyD88	33.6755	46.2799	0.458684	0.011	0.168156	no	Fluc vs MyD88
TMEM175	4:926261-952444	Fluc	MyD88	5.46759	3.52451	-0.633484	0.0111	0.16921	no	Fluc vs MyD88
ARHGAP29	1:94634462-94703307	Fluc	MyD88	12.236	8.86645	-0.464705	0.01115	0.169694	no	Fluc vs MyD88
SNRPB2	20:16710608-16722417	Fluc	MyD88	100.72	137.499	0.44907	0.01115	0.169694	no	Fluc vs MyD88
ARHGEF6	X:135747708-135863503	Fluc	MyD88	1.58798	1.05348	-0.592032	0.0112	0.170186	no	Fluc vs MyD88
PSME2	14:24612573-24615855	Fluc	MyD88	74.4844	103.505	0.474693	0.01125	0.170615	no	Fluc vs MyD88
PLSCR1	3:146232966-146262628	Fluc	MyD88	5.42331	7.92725	0.547646	0.0113	0.171085	no	Fluc vs MyD88
CDKN1C	11:2904447-2906995	Fluc	MyD88	1.54164	0.801398	-0.943876	0.01135	0.171575	no	Fluc vs MyD88
ETNK2	1:204100189-204121307	Fluc	MyD88	6.35497	4.36886	-0.540631	0.01135	0.171575	no	Fluc vs MyD88
PSRC1	1:109822175-109825790	Fluc	MyD88	19.2105	13.6475	-0.493262	0.01135	0.171575	no	Fluc vs MyD88
PTPRE	10:129705324-129884180	Fluc	MyD88	2.09608	3.03397	0.533512	0.01135	0.171575	no	Fluc vs MyD88
ESF1	20:13694968-13765532	Fluc	MyD88	20.4334	28.1908	0.464295	0.0114	0.172064	no	Fluc vs MyD88
ACSF2	17:48503518-48552200	Fluc	MyD88	8.57909	5.96619	-0.524014	0.01155	0.173562	no	Fluc vs MyD88
ITGA2B	17:42449549-42466873	Fluc	MyD88	0.686393	0.363364	-0.917619	0.01155	0.173562	no	Fluc vs MyD88
ENTPD3-AS1	3:40428672-40494799	Fluc	MyD88	0.379111	0.794987	1.06831	0.01165	0.174537	no	Fluc vs MyD88
GAMT	19:1397024-1401569	Fluc	MyD88	17.4159	11.9127	-0.547912	0.01165	0.174537	no	Fluc vs MyD88
TP53INP2	20:33292147-33301237	Fluc	MyD88	4.97933	3.42714	-0.538946	0.0117	0.174983	no	Fluc vs MyD88
ACTR3	2:114647536-114716167	Fluc	MyD88	118.55	161.964	0.450183	0.0118	0.175959	no	Fluc vs MyD88
CDV3	3:133292433-133309118	Fluc	MyD88	86.0292	117.603	0.451028	0.01185	0.176428	no	Fluc vs MyD88
TAPBP	6:33267470-33282164	Fluc	MyD88	21.4948	29.8274	0.472651	0.01185	0.176428	no	Fluc vs MyD88
ACVR1	2:158592957-158732374	Fluc	MyD88	9.41403	13.121	0.478994	0.0119	0.176913	no	Fluc vs MyD88
PNMAL1	19:46969747-46974820	Fluc	MyD88	0.507222	0.269212	-0.913872	0.0119	0.176913	no	Fluc vs MyD88
PRMT3	11:20409075-20530879	Fluc	MyD88	14.5303	20.155	0.472071	0.0119	0.176913	no	Fluc vs MyD88
TIMP1	X:47420498-47479256	Fluc	MyD88	277.965	194.549	-0.514771	0.01195	0.177373	no	Fluc vs MyD88
ADAMTSL4	1:150521897-150533413	Fluc	MyD88	1.80249	1.14994	-0.648423	0.01215	0.179399	no	Fluc vs MyD88
AXL	19:41725107-41767671	Fluc	MyD88	133.735	98.1859	-0.445792	0.0122	0.179861	no	Fluc vs MyD88
MTSS1	8:125563024-125740730	Fluc	MyD88	0.921789	1.42562	0.629085	0.0122	0.179861	no	Fluc vs MyD88
PGPEP1	19:18451407-18480763	Fluc	MyD88	0.739186	0.461053	-0.681004	0.0122	0.179861	no	Fluc vs MyD88
ACACB	12:109577201-109706031	Fluc	MyD88	0.803784	0.522611	-0.621071	0.01225	0.180365	no	Fluc vs MyD88
SLC25A33	1:9599527-9642831	Fluc	MyD88	11.1602	15.9589	0.516001	0.01225	0.180365	no	Fluc vs MyD88
PARD6A	16:67694850-67696681	Fluc	MyD88	0.809064	0.208965	-1.953	0.01235	0.181316	no	Fluc vs MyD88
GPSM1	9:139221931-139254057	Fluc	MyD88	23.4431	16.8211	-0.478886	0.0124	0.181835	no	Fluc vs MyD88
NDUFA5	7:123181082-123197958	Fluc	MyD88	38.6559	53.526	0.46955	0.0125	0.182787	no	Fluc vs MyD88
EBF4	20:2673523-2740754	Fluc	MyD88	3.10509	2.00867	-0.628395	0.01255	0.183293	no	Fluc vs MyD88
LIG1	19:48618702-48673560	Fluc	MyD88	33.476	24.4043	-0.455991	0.01255	0.183293	no	Fluc vs MyD88
ZFHX4	8:77523113-77779521	Fluc	MyD88	2.97724	2.10931	-0.497206	0.0126	0.183722	no	Fluc vs MyD88
BTG3	21:18965967-18985268	Fluc	MyD88	23.0071	31.9949	0.475761	0.01285	0.186096	no	Fluc vs MyD88
GPR176	15:40092930-40213093	Fluc	MyD88	25.6611	35.377	0.463229	0.01285	0.186096	no	Fluc vs MyD88
CD44	11:35160416-35253949	Fluc	MyD88	187.639	256.602	0.45157	0.0129	0.186485	no	Fluc vs MyD88
CDK18	1:205473683-205501921	Fluc	MyD88	0.711548	0.383288	-0.892534	0.013	0.187408	no	Fluc vs MyD88
SNX29	16:12070601-12668146	Fluc	MyD88	2.31334	1.63938	-0.496826	0.01305	0.187885	no	Fluc vs MyD88
GADD45A	1:68150859-68154021	Fluc	MyD88	60.0747	82.6172	0.459684	0.0131	0.188275	no	Fluc vs MyD88
ALG5	13:37523906-37573504	Fluc	MyD88	25.7749	35.7833	0.473321	0.01315	0.188715	no	Fluc vs MyD88
CARD11	7:2945708-3083509	Fluc	MyD88	1.55548	1.03516	-0.587509	0.01315	0.188715	no	Fluc vs MyD88
H6PD	1:9294862-9331396	Fluc	MyD88	3.66136	2.58521	-0.502101	0.01315	0.188715	no	Fluc vs MyD88
IFNAR1	21:34697213-34732129	Fluc	MyD88	11.4976	15.8079	0.459322	0.01315	0.188715	no	Fluc vs MyD88
EIF1AX	X:20142635-20159966	Fluc	MyD88	49.7827	67.6871	0.443236	0.0132	0.189191	no	Fluc vs MyD88
TOM1L2	17:17746821-17875784	Fluc	MyD88	9.11028	6.57259	-0.471034	0.0132	0.189191	no	Fluc vs MyD88
TOX2	20:42543491-42698256	Fluc	MyD88	3.94878	2.62909	-0.586846	0.0132	0.189191	no	Fluc vs MyD88
CDKN1B	12:12870301-12875305	Fluc	MyD88	24.2096	17.4589	-0.471615	0.0133	0.190153	no	Fluc vs MyD88
GCK	7:44183869-44229022	Fluc	MyD88	0.542601	0.259422	-1.06459	0.0133	0.190153	no	Fluc vs MyD88
ATN1	12:7033625-7051484	Fluc	MyD88	33.7119	24.5664	-0.456569	0.01335	0.190626	no	Fluc vs MyD88
PTPN2	18:12785476-12884334	Fluc	MyD88	24.5527	34.32	0.483164	0.01335	0.190626	no	Fluc vs MyD88
TCF7L2	10:114710008-114927437	Fluc	MyD88	6.43277	4.53707	-0.503679	0.01335	0.190626	no	Fluc vs MyD88
MYOF	10:95066185-95242074	Fluc	MyD88	35.3975	26.0257	-0.44371	0.0134	0.191037	no	Fluc vs MyD88
PICK1	22:38453261-38471708	Fluc	MyD88	4.04649	2.70127	-0.583035	0.01345	0.191501	no	Fluc vs MyD88
GOLT1B	12:21654698-21671337	Fluc	MyD88	25.6488	35.273	0.459674	0.01355	0.192329	no	Fluc vs MyD88
GJD3	17:38516903-38520945	Fluc	MyD88	0.770931	0.428373	-0.847733	0.0136	0.192748	no	Fluc vs MyD88
CCNB1IP1	14:20779526-20801471	Fluc	MyD88	18.1912	25.3835	0.48065	0.01365	0.193191	no	Fluc vs MyD88
FAM18B1	17:18684581-18710026	Fluc	MyD88	13.8882	19.5569	0.493822	0.01375	0.194067	no	Fluc vs MyD88
PTK2B	8:27168998-27316908	Fluc	MyD88	1.01232	0.636796	-0.668765	0.01375	0.194067	no	Fluc vs MyD88
2015-09-06	X:118749686-118827333	Fluc	MyD88	8.68355	6.1133	-0.506333	0.0138	0.194494	no	Fluc vs MyD88
PLEKHA3	2:179345198-179369783	Fluc	MyD88	6.19058	8.77327	0.503039	0.0139	0.195465	no	Fluc vs MyD88
PSMA2	7:42956459-42971805	Fluc	MyD88	135.021	183.876	0.445549	0.0139	0.195465	no	Fluc vs MyD88
C8orf4	8:40010986-40012827	Fluc	MyD88	0.0749547	0.545711	2.86404	0.01395	0.195914	no	Fluc vs MyD88
AKAP12	6:151561133-151679694	Fluc	MyD88	18.5047	25.1946	0.445223	0.01405	0.196827	no	Fluc vs MyD88
ALCAM	3:105085556-105295757	Fluc	MyD88	51.2373	37.9289	-0.433897	0.01405	0.196827	no	Fluc vs MyD88
MAPK13	6:36098260-36112301	Fluc	MyD88	0.577115	0.350541	-0.719276	0.01415	0.197752	no	Fluc vs MyD88
MGC12916	17:14204505-14249492	Fluc	MyD88	0.656675	1.27951	0.962338	0.0142	0.198143	no	Fluc vs MyD88
RPL37	5:40831429-40835387	Fluc	MyD88	403.925	546.18	0.43529	0.0142	0.198143	no	Fluc vs MyD88
DCUN1D5	11:102921412-102962944	Fluc	MyD88	3.31123	4.55463	0.459966	0.01425	0.198582	no	Fluc vs MyD88
SRPX2	X:99899162-99926296	Fluc	MyD88	3.68288	5.34773	0.538094	0.01425	0.198582	no	Fluc vs MyD88
MAP2K3	17:21187967-21218552	Fluc	MyD88	24.6915	33.927	0.458421	0.01445	0.200302	no	Fluc vs MyD88
MRGPRF	11:68771861-68780850	Fluc	MyD88	2.84213	1.79167	-0.66567	0.01445	0.200302	no	Fluc vs MyD88
ANXA8L2	10:47746919-47763041	Fluc	MyD88	0.266426	0.594205	1.15723	0.0145	0.200728	no	Fluc vs MyD88
NEDD4L	18:55711609-56068772	Fluc	MyD88	4.23578	5.85005	0.465821	0.01455	0.201131	no	Fluc vs MyD88
IFRD1	7:112063198-112117258	Fluc	MyD88	18.8787	25.6952	0.444739	0.01465	0.201965	no	Fluc vs MyD88
MGST1	12:16500075-16530123	Fluc	MyD88	4.14206	2.46203	-0.7505	0.0147	0.202426	no	Fluc vs MyD88
KDM4B	19:4969123-5153609	Fluc	MyD88	9.58926	6.91455	-0.471784	0.0148	0.203322	no	Fluc vs MyD88
LOC100288911	2:36581891-36582713	Fluc	MyD88	3.16566	1.70636	-0.891586	0.0148	0.203322	no	Fluc vs MyD88
VGLL3	3:86987122-87040257	Fluc	MyD88	6.1836	4.47423	-0.466807	0.01485	0.203727	no	Fluc vs MyD88
TIMP2	17:76849058-76921472	Fluc	MyD88	167.995	124.357	-0.433929	0.0149	0.204174	no	Fluc vs MyD88
BEND5	1:48998526-50489626	Fluc	MyD88	1.50758	0.827929	-0.864655	0.015	0.205052	no	Fluc vs MyD88
FAM43A	3:194406621-194409766	Fluc	MyD88	0.50048	0.915801	0.871723	0.015	0.205052	no	Fluc vs MyD88
PGM5P2	9:69080239-69147854	Fluc	MyD88	2.14254	1.32854	-0.689478	0.015	0.205052	no	Fluc vs MyD88
FHL2	2:105977282-106055230	Fluc	MyD88	70.7833	51.5146	-0.458429	0.01505	0.205496	no	Fluc vs MyD88
SERPINA1	14:94843083-94857029	Fluc	MyD88	0.4912	0.824763	0.747668	0.0151	0.205932	no	Fluc vs MyD88
DNAAF2	14:50091891-50101948	Fluc	MyD88	4.66211	6.64124	0.510468	0.01515	0.206354	no	Fluc vs MyD88
SLC20A1	2:113403433-113421402	Fluc	MyD88	29.3519	39.7918	0.439019	0.0152	0.206838	no	Fluc vs MyD88
WDR12	2:203745322-203776949	Fluc	MyD88	17.3733	23.9544	0.463424	0.0153	0.207653	no	Fluc vs MyD88
ABCE1	4:145915726-146050676	Fluc	MyD88	44.9833	61.2718	0.445835	0.0154	0.208518	no	Fluc vs MyD88
VAMP5	2:85811530-85820511	Fluc	MyD88	18.8592	12.7639	-0.563202	0.0154	0.208518	no	Fluc vs MyD88
CLIP3	19:36505561-36523797	Fluc	MyD88	6.89813	4.91153	-0.490034	0.01545	0.208923	no	Fluc vs MyD88
TRAM1L1	4:118004709-118006736	Fluc	MyD88	0.68466	1.23797	0.854515	0.01545	0.208923	no	Fluc vs MyD88
CLTCL1	22:19166985-19279239	Fluc	MyD88	2.94271	2.0727	-0.505631	0.0155	0.209328	no	Fluc vs MyD88
TLE4	9:82186877-82341656	Fluc	MyD88	13.2367	9.62798	-0.459235	0.0155	0.209328	no	Fluc vs MyD88
TRNP1	1:27320194-27327377	Fluc	MyD88	5.97771	4.00612	-0.577386	0.0155	0.209328	no	Fluc vs MyD88
OSBPL5	11:3108345-3186582	Fluc	MyD88	7.52189	5.35938	-0.489029	0.01555	0.209725	no	Fluc vs MyD88
THNSL2	2:88469813-88486156	Fluc	MyD88	1.12304	0.602317	-0.898818	0.0156	0.210125	no	Fluc vs MyD88
RAB3B	1:52373627-52456436	Fluc	MyD88	8.19933	6.03625	-0.441855	0.01565	0.21054	no	Fluc vs MyD88
PAK1IP1	6:10695187-10709972	Fluc	MyD88	32.7349	44.7893	0.452325	0.0157	0.210993	no	Fluc vs MyD88
TOMM7	7:22852250-22862421	Fluc	MyD88	91.1808	124.313	0.447172	0.0157	0.210993	no	Fluc vs MyD88
SNX10	7:26331514-26413949	Fluc	MyD88	1.14657	0.668134	-0.779113	0.01575	0.21139	no	Fluc vs MyD88
MFI2	3:196728610-196756687	Fluc	MyD88	18.3317	12.8207	-0.515864	0.0158	0.211891	no	Fluc vs MyD88
STRA6	15:74471806-74502046	Fluc	MyD88	0.369598	0.692308	0.905456	0.01585	0.212312	no	Fluc vs MyD88
AP1AR	4:113152894-113191211	Fluc	MyD88	7.82851	10.8253	0.4676	0.01595	0.213128	no	Fluc vs MyD88
GJA1	6:121756744-121770873	Fluc	MyD88	106.497	78.9499	-0.431797	0.01595	0.213128	no	Fluc vs MyD88
GIMAP2	7:150382793-150390729	Fluc	MyD88	0.142997	0.499764	1.80526	0.01605	0.213893	no	Fluc vs MyD88
PGM1	1:64058946-64125916	Fluc	MyD88	37.9126	27.8703	-0.443949	0.0161	0.214309	no	Fluc vs MyD88
TEKT2	1:36549675-36553876	Fluc	MyD88	0.468817	0.16916	-1.47063	0.0161	0.214309	no	Fluc vs MyD88
FSCN1	7:5632435-5646287	Fluc	MyD88	86.2175	63.7911	-0.434627	0.0162	0.215168	no	Fluc vs MyD88
SLC16A14	2:230899689-230933715	Fluc	MyD88	2.70831	1.85966	-0.542353	0.0162	0.215168	no	Fluc vs MyD88
RCOR2	11:63678692-63684316	Fluc	MyD88	1.80903	2.7562	0.607466	0.01625	0.215541	no	Fluc vs MyD88
TRAF3	14:103243815-103377837	Fluc	MyD88	8.89313	11.9876	0.430784	0.01625	0.215541	no	Fluc vs MyD88
BEND7	10:13480483-13544976	Fluc	MyD88	1.88761	1.17233	-0.687186	0.01635	0.216357	no	Fluc vs MyD88
GPR56	16:57653909-57698944	Fluc	MyD88	2.98612	2.03851	-0.550759	0.0164	0.216784	no	Fluc vs MyD88
PODN	1:53527723-53551174	Fluc	MyD88	0.797111	0.454678	-0.809936	0.0164	0.216784	no	Fluc vs MyD88
LOC338799	12:122233172-122241390	Fluc	MyD88	1.44096	0.753365	-0.93561	0.0165	0.217565	no	Fluc vs MyD88
SERPINA3	14:95078713-95090390	Fluc	MyD88	0.120138	0.474289	1.98107	0.01655	0.217982	no	Fluc vs MyD88
SLC38A3	3:50242691-50258406	Fluc	MyD88	3.73647	2.49016	-0.585441	0.01655	0.217982	no	Fluc vs MyD88
C1orf53	1:197871681-197876497	Fluc	MyD88	2.39366	1.08095	-1.14691	0.0167	0.219313	no	Fluc vs MyD88
C8orf47	8:99076749-99105838	Fluc	MyD88	0.911575	0.428225	-1.08999	0.0167	0.219313	no	Fluc vs MyD88
HSPB6	19:36245466-36247930	Fluc	MyD88	1.07601	0.419237	-1.35986	0.0167	0.219313	no	Fluc vs MyD88
ZNF767	7:149244244-149321881	Fluc	MyD88	4.85591	3.36192	-0.530456	0.01675	0.21974	no	Fluc vs MyD88
SNRPD1	18:19192259-19210208	Fluc	MyD88	106.755	143.891	0.430672	0.01695	0.221288	no	Fluc vs MyD88
CDH2	18:25530929-25757445	Fluc	MyD88	36.4963	49.3011	0.433869	0.017	0.221728	no	Fluc vs MyD88
PLA2R1	2:160797259-160919126	Fluc	MyD88	0.521615	0.815854	0.645327	0.01705	0.22214	no	Fluc vs MyD88
STC2	5:172741725-172756506	Fluc	MyD88	37.5972	50.4494	0.424212	0.01715	0.222947	no	Fluc vs MyD88
FN3K	17:80693451-80709073	Fluc	MyD88	1.73557	0.963273	-0.849396	0.0172	0.223383	no	Fluc vs MyD88
TFAM	10:60144902-60158990	Fluc	MyD88	25.3158	34.2638	0.436648	0.01725	0.223805	no	Fluc vs MyD88
CACNA1C	12:2162415-2807115	Fluc	MyD88	0.831174	0.583076	-0.511467	0.01735	0.224659	no	Fluc vs MyD88
REEP5	5:112196884-112258031	Fluc	MyD88	25.995	37.8635	0.542575	0.01735	0.224659	no	Fluc vs MyD88
ARL5A	2:152657479-152685009	Fluc	MyD88	10.5323	14.5453	0.465722	0.01745	0.225453	no	Fluc vs MyD88
BCL7C	16:30899115-30905399	Fluc	MyD88	36.9976	26.6247	-0.474663	0.0175	0.225815	no	Fluc vs MyD88
ZNF524	19:56111729-56114504	Fluc	MyD88	2.8565	1.62788	-0.811256	0.0175	0.225815	no	Fluc vs MyD88
DSP	6:7541869-7586946	Fluc	MyD88	23.98	17.6934	-0.438618	0.0176	0.226603	no	Fluc vs MyD88
MLLT1	19:6210391-6279959	Fluc	MyD88	23.2639	17.1904	-0.436488	0.01765	0.22696	no	Fluc vs MyD88
RCAN1	21:35888781-35987382	Fluc	MyD88	53.078	71.5476	0.430791	0.01765	0.22696	no	Fluc vs MyD88
FADS3	11:61640997-61659006	Fluc	MyD88	44.1068	32.2064	-0.453651	0.0177	0.227367	no	Fluc vs MyD88
MLLT11	1:151032150-151040973	Fluc	MyD88	5.22793	3.62047	-0.530066	0.0177	0.227367	no	Fluc vs MyD88
RBMS1	2:161128661-161350318	Fluc	MyD88	11.7187	16.0139	0.450515	0.01775	0.227757	no	Fluc vs MyD88
RASA4	7:102220092-102257205	Fluc	MyD88	0.613316	0.370938	-0.725451	0.0178	0.228203	no	Fluc vs MyD88
CYB5R3	22:43013845-43045405	Fluc	MyD88	83.388	62.264	-0.421441	0.01785	0.22858	no	Fluc vs MyD88
GEM	8:95261480-95274547	Fluc	MyD88	12.2626	8.84637	-0.471112	0.01785	0.22858	no	Fluc vs MyD88
PKD2	4:88928798-88998931	Fluc	MyD88	9.90397	7.22969	-0.454074	0.01785	0.22858	no	Fluc vs MyD88
H19	11:2016405-2019065	Fluc	MyD88	18.3762	13.4154	-0.453947	0.0179	0.228905	no	Fluc vs MyD88
RGS11	16:318309-325914	Fluc	MyD88	0.732211	0.377397	-0.956177	0.0179	0.228905	no	Fluc vs MyD88
EFEMP1	2:56093096-56151298	Fluc	MyD88	19.4102	14.2608	-0.444758	0.01795	0.22926	no	Fluc vs MyD88
PDE4A	19:10527448-10580307	Fluc	MyD88	2.90968	2.0197	-0.526718	0.0181	0.230478	no	Fluc vs MyD88
RAI14	5:34656410-34832717	Fluc	MyD88	28.4975	38.3713	0.429193	0.01815	0.230891	no	Fluc vs MyD88
RNF157	17:74132413-74236390	Fluc	MyD88	2.59996	1.81191	-0.520976	0.0182	0.231276	no	Fluc vs MyD88
KLF2	19:16435650-16438345	Fluc	MyD88	12.9239	9.01933	-0.518952	0.01825	0.231705	no	Fluc vs MyD88
OMA1	1:58946390-59012446	Fluc	MyD88	2.71164	4.00009	0.560867	0.01825	0.231705	no	Fluc vs MyD88
PKN3	9:131464801-131486408	Fluc	MyD88	11.5648	7.67631	-0.591256	0.01825	0.231705	no	Fluc vs MyD88
SNTA1	20:31995762-32031698	Fluc	MyD88	22.9948	16.8159	-0.451481	0.0183	0.232095	no	Fluc vs MyD88
FADS2	11:61595712-61634825	Fluc	MyD88	59.7904	44.3832	-0.4299	0.01835	0.232478	no	Fluc vs MyD88
HSPB8	12:119616594-119632551	Fluc	MyD88	5.47601	3.73627	-0.551527	0.01835	0.232478	no	Fluc vs MyD88
ZNF219	14:21558204-21572863	Fluc	MyD88	4.56464	3.1254	-0.546462	0.01835	0.232478	no	Fluc vs MyD88
PPM1K	4:89178760-89205983	Fluc	MyD88	0.939041	1.37575	0.550961	0.0184	0.232866	no	Fluc vs MyD88
TGIF1	18:3412071-3458409	Fluc	MyD88	8.45416	11.9228	0.495994	0.0184	0.232866	no	Fluc vs MyD88
E2F2	1:23832919-23857712	Fluc	MyD88	2.09029	1.44016	-0.537473	0.01845	0.233175	no	Fluc vs MyD88
PPAT	4:57259527-57301802	Fluc	MyD88	16.3885	22.1823	0.436728	0.01845	0.233175	no	Fluc vs MyD88
DDIT4	10:74033676-74035797	Fluc	MyD88	64.7199	87.366	0.432861	0.0185	0.233607	no	Fluc vs MyD88
SASH1	6:148663728-148873184	Fluc	MyD88	4.20208	3.05335	-0.460713	0.0185	0.233607	no	Fluc vs MyD88
SNRPE	1:203830739-203840280	Fluc	MyD88	81.2869	109.536	0.430308	0.01855	0.233979	no	Fluc vs MyD88
ZNF217	20:52183609-52199636	Fluc	MyD88	13.7359	18.5778	0.435626	0.01855	0.233979	no	Fluc vs MyD88
FLYWCH1	16:2961979-3001209	Fluc	MyD88	12.7192	9.02114	-0.495628	0.01865	0.234711	no	Fluc vs MyD88
IER5	1:181057637-181059979	Fluc	MyD88	41.5478	30.8081	-0.431459	0.01865	0.234711	no	Fluc vs MyD88
PIK3R2	19:18264015-18281343	Fluc	MyD88	17.1456	12.5943	-0.445065	0.01865	0.234711	no	Fluc vs MyD88
HIGD1A	3:42824399-42846027	Fluc	MyD88	78.4606	104.426	0.412443	0.0187	0.235095	no	Fluc vs MyD88
MIR143HG	5:148786439-148812399	Fluc	MyD88	0.887586	0.594442	-0.578351	0.0187	0.235095	no	Fluc vs MyD88
B4GALT1	9:33110638-33167356	Fluc	MyD88	35.5072	47.59	0.422547	0.01875	0.235453	no	Fluc vs MyD88
BID	22:18216905-18257431	Fluc	MyD88	20.0711	27.2726	0.442334	0.01875	0.235453	no	Fluc vs MyD88
ZC3H8	2:112973438-113012664	Fluc	MyD88	7.17019	10.0431	0.486122	0.01875	0.235453	no	Fluc vs MyD88
NTF3	12:5541279-5604465	Fluc	MyD88	0.80523	1.45821	0.856728	0.0188	0.23587	no	Fluc vs MyD88
SEMA6B	19:4542599-4559771	Fluc	MyD88	4.8508	3.4181	-0.505027	0.0189	0.236597	no	Fluc vs MyD88
KAZN	1:14925212-15478960	Fluc	MyD88	5.57058	3.92677	-0.504486	0.01895	0.236984	no	Fluc vs MyD88
MRPS24	7:43906156-43965996	Fluc	MyD88	98.8972	150.064	0.601574	0.01895	0.236984	no	Fluc vs MyD88
SKI	1:2160133-2241652	Fluc	MyD88	23.0497	17.1792	-0.424084	0.01895	0.236984	no	Fluc vs MyD88
HOXC11	12:54356091-54370203	Fluc	MyD88	1.09936	0.558541	-0.976936	0.019	0.237377	no	Fluc vs MyD88
LOC100652988	10:4277080-4285967	Fluc	MyD88	0.517631	1.09231	1.07738	0.019	0.237377	no	Fluc vs MyD88
ATP1B3	3:141595469-141645382	Fluc	MyD88	86.4813	115.616	0.418883	0.01915	0.238481	no	Fluc vs MyD88
IL15RA	10:5994333-6020150	Fluc	MyD88	0.484676	0.941344	0.957702	0.0193	0.239637	no	Fluc vs MyD88
RRP15	1:218458628-218511325	Fluc	MyD88	6.15375	8.36311	0.442572	0.0193	0.239637	no	Fluc vs MyD88
DNM1P41	15:84835298-84839736	Fluc	MyD88	2.0559	1.39919	-0.555174	0.01935	0.240028	no	Fluc vs MyD88
SLC11A2	12:51373565-51422058	Fluc	MyD88	10.8493	14.942	0.461766	0.01935	0.240028	no	Fluc vs MyD88
FAM98C	19:38893774-38916945	Fluc	MyD88	4.44106	2.85029	-0.639795	0.0195	0.241256	no	Fluc vs MyD88
PLEKHG5	1:6521210-6580121	Fluc	MyD88	4.46368	3.12957	-0.512267	0.0195	0.241256	no	Fluc vs MyD88
GRIP1	12:66741210-67072925	Fluc	MyD88	0.45803	0.271732	-0.753257	0.0196	0.241993	no	Fluc vs MyD88
UCK2	1:165796731-165880855	Fluc	MyD88	23.095	30.8634	0.418313	0.0196	0.241993	no	Fluc vs MyD88
BAIAP2	17:79008946-79156964	Fluc	MyD88	11.1237	8.04441	-0.467572	0.01965	0.242365	no	Fluc vs MyD88
MAGI3	1:113933474-114228545	Fluc	MyD88	1.80344	1.27282	-0.502723	0.01965	0.242365	no	Fluc vs MyD88
MGARP	4:140187316-140201492	Fluc	MyD88	1.88987	1.11887	-0.756238	0.01965	0.242365	no	Fluc vs MyD88
RNASE4	14:21152335-21168758	Fluc	MyD88	2.03231	1.20831	-0.750132	0.01975	0.243202	no	Fluc vs MyD88
ACVR2B	3:38492517-38534633	Fluc	MyD88	0.832001	1.1934	0.520425	0.01985	0.243963	no	Fluc vs MyD88
HAS2-AS1	8:122625270-122657565	Fluc	MyD88	1.65735	4.67957	1.4975	0.01985	0.243963	no	Fluc vs MyD88
TMX1	14:51706885-51724373	Fluc	MyD88	23.0199	30.9162	0.42548	0.01985	0.243963	no	Fluc vs MyD88
RNF24	20:3912067-3996216	Fluc	MyD88	18.5888	13.6446	-0.446102	0.0199	0.244371	no	Fluc vs MyD88
SESN2	1:28585962-28609002	Fluc	MyD88	7.87211	5.6752	-0.472079	0.0199	0.244371	no	Fluc vs MyD88
LINC00471	2:232373136-232379050	Fluc	MyD88	0.256051	0.638822	1.31898	0.02	0.245138	no	Fluc vs MyD88
SELK	3:53919225-53925989	Fluc	MyD88	44.3045	60.5201	0.449961	0.02	0.245138	no	Fluc vs MyD88
CACNA1H	16:1203240-1275254	Fluc	MyD88	1.36684	0.936904	-0.544867	0.02005	0.245529	no	Fluc vs MyD88
NRBP2	8:144915754-144923146	Fluc	MyD88	8.22671	5.94262	-0.469216	0.0201	0.245902	no	Fluc vs MyD88
RBM48	7:92158086-92166823	Fluc	MyD88	5.47832	7.81478	0.512471	0.0203	0.247305	no	Fluc vs MyD88
GPR37	7:124385654-124406079	Fluc	MyD88	1.59296	1.04615	-0.606621	0.02035	0.247699	no	Fluc vs MyD88
LOC730102	1:177975270-178007142	Fluc	MyD88	0.690101	0.382952	-0.849645	0.02045	0.24846	no	Fluc vs MyD88
SPCS2	11:74660291-74690076	Fluc	MyD88	75.3271	100.781	0.41998	0.02045	0.24846	no	Fluc vs MyD88
TMEM54	1:33352097-33366953	Fluc	MyD88	15.8348	11.0101	-0.524274	0.02045	0.24846	no	Fluc vs MyD88
GTDC1	2:144703580-145090083	Fluc	MyD88	4.68656	6.62789	0.500019	0.0205	0.248817	no	Fluc vs MyD88
KIFC2	8:145691737-145701718	Fluc	MyD88	3.29444	2.22402	-0.56686	0.0205	0.248817	no	Fluc vs MyD88
HDGFRP3	15:83806803-83876770	Fluc	MyD88	15.1821	20.7684	0.45202	0.02055	0.249191	no	Fluc vs MyD88
OSR2	8:99956630-99964328	Fluc	MyD88	0.967838	0.478964	-1.01485	0.02055	0.249191	no	Fluc vs MyD88
JAM2	21:27011593-27089874	Fluc	MyD88	1.10083	1.77725	0.691057	0.0206	0.249553	no	Fluc vs MyD88
AMH	19:2249112-2252072	Fluc	MyD88	5.95427	4.03557	-0.561153	0.02075	0.250692	no	Fluc vs MyD88
ARL6IP5	3:69134089-69155239	Fluc	MyD88	19.4159	14.2395	-0.447342	0.0208	0.25108	no	Fluc vs MyD88
CYTH3	7:6201409-6312242	Fluc	MyD88	15.9591	11.8099	-0.434379	0.02085	0.251446	no	Fluc vs MyD88
EBAG9	8:110551928-110577392	Fluc	MyD88	8.94637	12.3907	0.469884	0.0209	0.251797	no	Fluc vs MyD88
TDRD7	9:100174301-100258407	Fluc	MyD88	1.29466	0.851154	-0.605082	0.02095	0.252157	no	Fluc vs MyD88
ZNF488	10:48355088-48373866	Fluc	MyD88	4.5102	3.19105	-0.499163	0.02095	0.252157	no	Fluc vs MyD88
ITIH4	3:52847005-52864717	Fluc	MyD88	0.756493	0.442156	-0.774772	0.02105	0.252902	no	Fluc vs MyD88
DNAJB1	19:14625581-14629201	Fluc	MyD88	91.78	68.7265	-0.417314	0.02115	0.253683	no	Fluc vs MyD88
PIANP	12:6802956-6810009	Fluc	MyD88	5.70393	4.00195	-0.51125	0.02125	0.254383	no	Fluc vs MyD88
SH3D21	1:36771993-36786948	Fluc	MyD88	8.97701	6.51483	-0.462508	0.02125	0.254383	no	Fluc vs MyD88
RAB11FIP1	8:37716464-37757015	Fluc	MyD88	5.54924	4.06451	-0.449207	0.0213	0.254693	no	Fluc vs MyD88
MTUS1	8:17501302-17658426	Fluc	MyD88	1.07391	0.721415	-0.573977	0.02145	0.255804	no	Fluc vs MyD88
PPP1R3C	10:93388196-93392858	Fluc	MyD88	7.69167	5.5284	-0.476435	0.0215	0.256204	no	Fluc vs MyD88
LRRC16A	6:25279655-25620758	Fluc	MyD88	2.44513	1.73439	-0.495487	0.02155	0.256578	no	Fluc vs MyD88
SMARCA2	9:2015341-2193624	Fluc	MyD88	8.25908	6.11621	-0.433343	0.0217	0.257679	no	Fluc vs MyD88
SOGA1	20:35405844-35492087	Fluc	MyD88	15.8933	11.4753	-0.469894	0.02175	0.258097	no	Fluc vs MyD88
CUL9	6:43149921-43192325	Fluc	MyD88	4.09497	2.98137	-0.457878	0.0218	0.258465	no	Fluc vs MyD88
IRX5	16:54965110-54968397	Fluc	MyD88	1.47008	0.886329	-0.729982	0.0218	0.258465	no	Fluc vs MyD88
SHROOM3	4:77356252-77704406	Fluc	MyD88	1.20169	0.850186	-0.499209	0.0218	0.258465	no	Fluc vs MyD88
TPGS1	19:507496-519654	Fluc	MyD88	5.00783	3.13606	-0.675234	0.0218	0.258465	no	Fluc vs MyD88
PTGFR	1:78956727-79006386	Fluc	MyD88	3.11794	2.21242	-0.494969	0.02185	0.258824	no	Fluc vs MyD88
MFSD6	2:191273080-191367041	Fluc	MyD88	0.470241	0.272262	-0.788404	0.0219	0.25919	no	Fluc vs MyD88
TTLL1	22:43434476-43485434	Fluc	MyD88	2.08761	1.3306	-0.649781	0.022	0.259885	no	Fluc vs MyD88
OSTM1	6:108362612-108395941	Fluc	MyD88	9.6616	13.0715	0.436085	0.02205	0.260188	no	Fluc vs MyD88
PSMA5	1:109941652-109969108	Fluc	MyD88	31.6051	42.1045	0.413816	0.02205	0.260188	no	Fluc vs MyD88
SH3BGRL2	6:80340999-80413369	Fluc	MyD88	0.312817	0.523541	0.742982	0.02205	0.260188	no	Fluc vs MyD88
PFN2	3:149682690-149688741	Fluc	MyD88	149.776	112.738	-0.409827	0.0221	0.260581	no	Fluc vs MyD88
CRTC1	19:18794424-18893143	Fluc	MyD88	2.36821	1.68045	-0.494951	0.02215	0.260951	no	Fluc vs MyD88
FAIM2	12:50260678-50297760	Fluc	MyD88	0.752002	0.463063	-0.699527	0.02215	0.260951	no	Fluc vs MyD88
CMAS	12:22199109-22218608	Fluc	MyD88	15.9932	21.757	0.444017	0.0222	0.261313	no	Fluc vs MyD88
FAM196B	5:169064250-169510386	Fluc	MyD88	6.59098	4.43534	-0.57145	0.0222	0.261313	no	Fluc vs MyD88
LOC100287482	7:129142319-129152773	Fluc	MyD88	0.82399	0.314904	-1.38772	0.0222	0.261313	no	Fluc vs MyD88
FAM65B	6:24804512-24911195	Fluc	MyD88	0.599565	0.292635	-1.03481	0.02225	0.261671	no	Fluc vs MyD88
LOC100996255	15:32828959-32873086	Fluc	MyD88	0.775795	0.363265	-1.09465	0.02225	0.261671	no	Fluc vs MyD88
TGFBR1	9:101867411-101916474	Fluc	MyD88	15.221	20.2517	0.411984	0.02225	0.261671	no	Fluc vs MyD88
SPPL2A	15:50999729-51057910	Fluc	MyD88	14.401	19.5822	0.443375	0.02235	0.2624	no	Fluc vs MyD88
SSBP2	5:80713178-81047072	Fluc	MyD88	1.86234	1.28244	-0.538226	0.02235	0.2624	no	Fluc vs MyD88
CLSTN2	3:139654026-140286919	Fluc	MyD88	0.628723	0.387007	-0.700066	0.0224	0.262727	no	Fluc vs MyD88
RIOK2	5:96496570-96519005	Fluc	MyD88	10.7371	14.7035	0.453559	0.0224	0.262727	no	Fluc vs MyD88
TRIM8	10:104404251-104418076	Fluc	MyD88	17.7831	24.1701	0.442718	0.02245	0.263101	no	Fluc vs MyD88
NKX3-1	8:23536205-23540450	Fluc	MyD88	7.54215	10.347	0.456167	0.0225	0.263395	no	Fluc vs MyD88
SEC31B	10:102246402-102279595	Fluc	MyD88	1.00687	0.644788	-0.642982	0.0225	0.263395	no	Fluc vs MyD88
INCA1	17:4891424-4900905	Fluc	MyD88	0.810224	0.372449	-1.12128	0.02255	0.263767	no	Fluc vs MyD88
KLHL24	3:183353410-183402307	Fluc	MyD88	0.701136	1.03605	0.563322	0.0227	0.264848	no	Fluc vs MyD88
PLAGL1	6:144261436-144385735	Fluc	MyD88	8.14124	5.89282	-0.466289	0.02275	0.265189	no	Fluc vs MyD88
AIF1L	9:133971862-133998539	Fluc	MyD88	3.7764	2.69073	-0.489015	0.02285	0.265866	no	Fluc vs MyD88
B2M	15:45003684-45010357	Fluc	MyD88	572.252	760.258	0.409838	0.02285	0.265866	no	Fluc vs MyD88
TEX10	9:103064356-103115259	Fluc	MyD88	22.6289	30.2588	0.419189	0.02285	0.265866	no	Fluc vs MyD88
TIMM17A	1:201924618-201939789	Fluc	MyD88	62.4769	83.1172	0.411823	0.02285	0.265866	no	Fluc vs MyD88
TANC2	17:61086897-61505067	Fluc	MyD88	6.65307	4.91519	-0.436774	0.02295	0.266598	no	Fluc vs MyD88
EVI5	1:92974252-93257961	Fluc	MyD88	2.57794	3.54033	0.457666	0.02305	0.267346	no	Fluc vs MyD88
PSMB9	6:32821937-32827628	Fluc	MyD88	4.9298	7.30731	0.567812	0.02305	0.267346	no	Fluc vs MyD88
TMEM8B	9:35829221-35854844	Fluc	MyD88	3.68987	2.48104	-0.572625	0.02305	0.267346	no	Fluc vs MyD88
MORC4	X:106183963-106243474	Fluc	MyD88	5.59099	4.08389	-0.453162	0.0231	0.267715	no	Fluc vs MyD88
C1orf226	1:162348695-162356608	Fluc	MyD88	0.579771	0.319823	-0.85821	0.0232	0.268362	no	Fluc vs MyD88
ASIC3	7:150745378-150749843	Fluc	MyD88	1.18453	0.679585	-0.801592	0.02325	0.268704	no	Fluc vs MyD88
PSG2	19:43568361-43586893	Fluc	MyD88	0.978713	0.51889	-0.915458	0.0233	0.269053	no	Fluc vs MyD88
QTRTD1	3:113775581-113807269	Fluc	MyD88	14.9681	19.9362	0.413498	0.0233	0.269053	no	Fluc vs MyD88
RNF138	18:29671817-29711524	Fluc	MyD88	19.0491	25.4744	0.419322	0.02335	0.269397	no	Fluc vs MyD88
C2CD3	11:73745479-73882064	Fluc	MyD88	10.4567	7.80921	-0.421184	0.0234	0.269672	no	Fluc vs MyD88
RPS6KA5	14:91337158-91526993	Fluc	MyD88	2.77056	1.87112	-0.566277	0.0234	0.269672	no	Fluc vs MyD88
VPS13A	9:79791671-80032399	Fluc	MyD88	5.18468	3.83412	-0.435361	0.0234	0.269672	no	Fluc vs MyD88
AQP3	9:33441151-33447631	Fluc	MyD88	1.89352	1.17108	-0.693225	0.02345	0.270045	no	Fluc vs MyD88
UBD	6:29523388-29527702	Fluc	MyD88	0.117501	0.737099	2.64919	0.02355	0.27073	no	Fluc vs MyD88
BCAS4	20:49411466-49493714	Fluc	MyD88	20.0051	27.303	0.44869	0.0236	0.271115	no	Fluc vs MyD88
SLC35G2	3:136537860-136574734	Fluc	MyD88	2.66676	3.9322	0.560247	0.0236	0.271115	no	Fluc vs MyD88
B3GNT2	2:62423261-62451866	Fluc	MyD88	4.46285	6.18367	0.470498	0.02365	0.271438	no	Fluc vs MyD88
LOC148709	1:202830881-202844369	Fluc	MyD88	0.557964	0.263642	-1.08159	0.02365	0.271438	no	Fluc vs MyD88
PIGA	X:15337572-15353676	Fluc	MyD88	5.89923	8.12149	0.461217	0.02365	0.271438	no	Fluc vs MyD88
INA	10:105036919-105050108	Fluc	MyD88	1.29812	0.838441	-0.630643	0.0237	0.271771	no	Fluc vs MyD88
2015-09-09	17:75277491-75496678	Fluc	MyD88	65.4966	49.6567	-0.399432	0.02375	0.27213	no	Fluc vs MyD88
SLC22A18	11:2909326-2946476	Fluc	MyD88	1.30992	0.643528	-1.02541	0.02375	0.27213	no	Fluc vs MyD88
ZBTB4	17:7362684-7387568	Fluc	MyD88	19.3915	14.5549	-0.413922	0.0238	0.272447	no	Fluc vs MyD88
SPTBN1	2:54683453-54898583	Fluc	MyD88	19.9147	14.984	-0.410411	0.0239	0.273135	no	Fluc vs MyD88
ADCY9	16:4012649-4166186	Fluc	MyD88	5.45427	4.00379	-0.446021	0.02395	0.273487	no	Fluc vs MyD88
KHK	2:27309610-27341995	Fluc	MyD88	1.03245	0.553961	-0.89822	0.02395	0.273487	no	Fluc vs MyD88
PRDX2	19:12907633-12912694	Fluc	MyD88	85.1409	63.931	-0.413336	0.02395	0.273487	no	Fluc vs MyD88
FCF1	14:75179849-75203394	Fluc	MyD88	41.829	55.734	0.414053	0.024	0.273886	no	Fluc vs MyD88
HOXD4	2:177016112-177017951	Fluc	MyD88	4.96897	3.29745	-0.591598	0.02405	0.274212	no	Fluc vs MyD88
ANKRD35	1:145549208-145568526	Fluc	MyD88	0.490986	0.276245	-0.829733	0.0241	0.274562	no	Fluc vs MyD88
SNRPA1	15:101821714-101835460	Fluc	MyD88	66.5187	88.3523	0.409509	0.0241	0.274562	no	Fluc vs MyD88
REP15	12:27849427-27850566	Fluc	MyD88	0.538955	1.09984	1.02906	0.02415	0.274945	no	Fluc vs MyD88
S1PR3	9:91605777-91620070	Fluc	MyD88	5.34591	7.30644	0.450733	0.02415	0.274945	no	Fluc vs MyD88
ASB16	17:42248073-42264085	Fluc	MyD88	2.40596	1.22308	-0.976087	0.02425	0.275556	no	Fluc vs MyD88
SELO	22:50639407-50656045	Fluc	MyD88	10.9334	7.92128	-0.464933	0.02425	0.275556	no	Fluc vs MyD88
ATP6V0A2	12:124196864-124246302	Fluc	MyD88	3.34888	4.57219	0.449207	0.0243	0.275908	no	Fluc vs MyD88
MYPN	10:69865873-69971774	Fluc	MyD88	1.4494	1.00591	-0.526948	0.0243	0.275908	no	Fluc vs MyD88
NIPA2	15:23004683-23034427	Fluc	MyD88	31.7718	42.1993	0.40947	0.0245	0.27724	no	Fluc vs MyD88
PADI4	1:17634689-17690495	Fluc	MyD88	0.548481	0.277639	-0.982233	0.0245	0.27724	no	Fluc vs MyD88
RPS27A	2:55399682-55462989	Fluc	MyD88	715.839	950.221	0.408627	0.0245	0.27724	no	Fluc vs MyD88
PCBP4	3:51989329-52001482	Fluc	MyD88	27.2556	20.2324	-0.429886	0.02455	0.277531	no	Fluc vs MyD88
UBE2Q2P2	15:82647285-82707816	Fluc	MyD88	0.175936	0.448323	1.34948	0.02455	0.277531	no	Fluc vs MyD88
CNIH	14:54893646-54908148	Fluc	MyD88	78.4094	104.158	0.409678	0.0246	0.277821	no	Fluc vs MyD88
PKIB	6:122793061-123047518	Fluc	MyD88	0.989339	0.56168	-0.816717	0.0246	0.277821	no	Fluc vs MyD88
LOC338758	12:90102731-90105729	Fluc	MyD88	0.541034	0.936034	0.790842	0.02465	0.278121	no	Fluc vs MyD88
CLK1	2:201717731-201729467	Fluc	MyD88	15.6999	21.2869	0.439213	0.0247	0.278454	no	Fluc vs MyD88
EPN1	19:56186560-56207133	Fluc	MyD88	81.7591	61.5489	-0.409646	0.0247	0.278454	no	Fluc vs MyD88
GLRX	5:95149552-95158577	Fluc	MyD88	7.25485	4.94038	-0.554323	0.0247	0.278454	no	Fluc vs MyD88
AGPAT9	4:84457066-84527028	Fluc	MyD88	0.75782	0.441222	-0.78035	0.0248	0.279125	no	Fluc vs MyD88
LONRF1	8:12579405-12612992	Fluc	MyD88	3.50997	4.84574	0.465257	0.0248	0.279125	no	Fluc vs MyD88
DCHS1	11:6642557-6677080	Fluc	MyD88	3.80166	2.80018	-0.44111	0.0249	0.279768	no	Fluc vs MyD88
CRMP1	4:5822490-5894785	Fluc	MyD88	2.22979	3.19079	0.517005	0.02495	0.280098	no	Fluc vs MyD88
DRAXIN	1:11751780-11780336	Fluc	MyD88	1.12249	0.628461	-0.836809	0.02495	0.280098	no	Fluc vs MyD88
C3orf33	3:155480400-155524055	Fluc	MyD88	1.09403	1.73326	0.663837	0.025	0.28042	no	Fluc vs MyD88
DMPK	19:46272974-46285815	Fluc	MyD88	16.0646	11.8684	-0.436753	0.025	0.28042	no	Fluc vs MyD88
SIM2	21:38071990-38122510	Fluc	MyD88	4.23564	5.96719	0.494473	0.025	0.28042	no	Fluc vs MyD88
TUB	11:8060179-8190590	Fluc	MyD88	10.3902	7.77899	-0.417575	0.025	0.28042	no	Fluc vs MyD88
ARAP1	11:72396113-72463434	Fluc	MyD88	22.3536	16.8383	-0.408758	0.02505	0.280724	no	Fluc vs MyD88
SH2D3C	9:130500595-130541048	Fluc	MyD88	0.840064	0.498942	-0.751628	0.02505	0.280724	no	Fluc vs MyD88
RPIA	2:88991175-89050452	Fluc	MyD88	15.2605	20.7218	0.441342	0.0251	0.281001	no	Fluc vs MyD88
MCM5	22:35796115-35820495	Fluc	MyD88	90.435	68.3805	-0.403295	0.02515	0.281347	no	Fluc vs MyD88
LOC653653	17:58179120-58180280	Fluc	MyD88	0.333849	0.807852	1.27489	0.0252	0.28167	no	Fluc vs MyD88
G0S2	1:209848669-209849735	Fluc	MyD88	4.07098	6.11215	0.586305	0.02525	0.282071	no	Fluc vs MyD88
MAGOHB	12:10756363-10766208	Fluc	MyD88	25.5095	33.9394	0.411926	0.02525	0.282071	no	Fluc vs MyD88
APOBEC3B	22:39378403-39388784	Fluc	MyD88	6.60041	4.59424	-0.522728	0.0253	0.28236	no	Fluc vs MyD88
ZNF192	6:28109715-28125236	Fluc	MyD88	7.25424	5.37333	-0.43301	0.02535	0.28266	no	Fluc vs MyD88
LOC730268	2:87991039-88047142	Fluc	MyD88	2.17394	3.17622	0.547002	0.0254	0.282974	no	Fluc vs MyD88
DENND6B	22:50750391-50765489	Fluc	MyD88	0.608406	0.285667	-1.0907	0.02545	0.283273	no	Fluc vs MyD88
WDR75	2:190306158-190340264	Fluc	MyD88	21.9201	29.2664	0.416992	0.02555	0.283902	no	Fluc vs MyD88
PLEKHB1	11:73357222-73373864	Fluc	MyD88	0.469198	0.216316	-1.11705	0.0256	0.284222	no	Fluc vs MyD88
FGFR1OP	6:167412815-167454066	Fluc	MyD88	18.0141	24.1721	0.42422	0.0257	0.284796	no	Fluc vs MyD88
DCAF13	8:104410865-104455681	Fluc	MyD88	39.7076	55.3095	0.478112	0.02575	0.285103	no	Fluc vs MyD88
FAM198B	4:159045731-159094202	Fluc	MyD88	0.664517	0.412474	-0.688003	0.02575	0.285103	no	Fluc vs MyD88
ZMYM3	X:70459473-70475047	Fluc	MyD88	14.3608	10.4547	-0.457979	0.02575	0.285103	no	Fluc vs MyD88
NTM	11:131240370-132206716	Fluc	MyD88	1.78861	2.65754	0.571254	0.0258	0.285394	no	Fluc vs MyD88
SMCR7	17:18163847-18169095	Fluc	MyD88	5.4699	3.86907	-0.499528	0.0258	0.285394	no	Fluc vs MyD88
ZNF362	1:33722173-33766320	Fluc	MyD88	7.44748	5.42056	-0.458312	0.0258	0.285394	no	Fluc vs MyD88
ARL4A	7:12726451-12730559	Fluc	MyD88	4.42684	3.16111	-0.485845	0.02585	0.285696	no	Fluc vs MyD88
MMP16	8:89049459-89339717	Fluc	MyD88	2.23459	1.60987	-0.473061	0.02595	0.286302	no	Fluc vs MyD88
STARD8	X:67867510-67945684	Fluc	MyD88	1.2176	0.821706	-0.567352	0.02595	0.286302	no	Fluc vs MyD88
BBS1	11:66278118-66301084	Fluc	MyD88	6.15676	4.4573	-0.466003	0.026	0.28662	no	Fluc vs MyD88
EIF5AL1	10:81272356-81276196	Fluc	MyD88	1.27479	1.84818	0.535845	0.026	0.28662	no	Fluc vs MyD88
EPHB3	3:184279586-184300196	Fluc	MyD88	2.79826	1.96853	-0.507412	0.026	0.28662	no	Fluc vs MyD88
NDUFAF4	6:97337186-97345767	Fluc	MyD88	7.22942	9.84751	0.44588	0.026	0.28662	no	Fluc vs MyD88
SOX13	1:204042245-204096871	Fluc	MyD88	3.77387	2.69888	-0.483681	0.026	0.28662	no	Fluc vs MyD88
CRIP2	14:105939274-105946507	Fluc	MyD88	8.2461	5.68065	-0.537655	0.02615	0.287563	no	Fluc vs MyD88
FAM155A	13:107820878-108519460	Fluc	MyD88	0.978727	1.4471	0.564184	0.02615	0.287563	no	Fluc vs MyD88
RNPEPL1	2:241508003-241518149	Fluc	MyD88	6.64035	4.8035	-0.467171	0.02625	0.288207	no	Fluc vs MyD88
ST6GALNAC6	9:130647600-130661871	Fluc	MyD88	53.3989	40.1609	-0.411019	0.02625	0.288207	no	Fluc vs MyD88
PXK	3:58318616-58410878	Fluc	MyD88	8.46126	11.5192	0.445099	0.0263	0.288519	no	Fluc vs MyD88
E2F8	11:19245609-19263202	Fluc	MyD88	4.28467	3.09693	-0.468346	0.0264	0.289167	no	Fluc vs MyD88
LOC100996447	3:158263008-158288855	Fluc	MyD88	0.749968	1.26411	0.753222	0.02645	0.289485	no	Fluc vs MyD88
PFKP	10:3109711-3178997	Fluc	MyD88	124.626	94.919	-0.392832	0.02645	0.289485	no	Fluc vs MyD88
FKBP1B	2:24272583-24286551	Fluc	MyD88	4.23172	2.70554	-0.645328	0.02655	0.290104	no	Fluc vs MyD88
LMO2	11:33880121-33913836	Fluc	MyD88	0.193807	0.463834	1.25899	0.02655	0.290104	no	Fluc vs MyD88
CNTRL	9:123850573-123939886	Fluc	MyD88	3.90058	2.89449	-0.430381	0.0266	0.290361	no	Fluc vs MyD88
GNPNAT1	14:53241910-53258386	Fluc	MyD88	28.932	38.2549	0.402979	0.02665	0.290688	no	Fluc vs MyD88
OTUD4	4:146054801-146100832	Fluc	MyD88	8.31801	11.5493	0.4735	0.02665	0.290688	no	Fluc vs MyD88
TNFRSF10C	8:22941867-22974950	Fluc	MyD88	0.725842	0.252014	-1.52615	0.02665	0.290688	no	Fluc vs MyD88
SNPH	20:1246959-1289971	Fluc	MyD88	2.082	1.45684	-0.515128	0.0267	0.290985	no	Fluc vs MyD88
MRPL42	12:93861265-93897548	Fluc	MyD88	19.0975	25.4654	0.415157	0.02675	0.291367	no	Fluc vs MyD88
PWWP2A	5:159502888-159546452	Fluc	MyD88	6.07389	8.22678	0.437706	0.02675	0.291367	no	Fluc vs MyD88
LOC100996660	17:58203897-58213109	Fluc	MyD88	0.672288	0.28576	-1.23428	0.02685	0.291969	no	Fluc vs MyD88
SUV39H2	10:14920781-14946314	Fluc	MyD88	5.74427	7.86128	0.452641	0.02685	0.291969	no	Fluc vs MyD88
TM2D3	15:102182048-102192594	Fluc	MyD88	14.8737	20.4942	0.46245	0.02695	0.292577	no	Fluc vs MyD88
RND3	2:151324706-151344209	Fluc	MyD88	36.2222	47.5434	0.392372	0.0271	0.293568	no	Fluc vs MyD88
RPS23	5:81569138-81574235	Fluc	MyD88	289.552	383.743	0.406317	0.0272	0.294104	no	Fluc vs MyD88
SETD5-AS1	3:9430536-9439174	Fluc	MyD88	8.98373	12.535	0.480574	0.0272	0.294104	no	Fluc vs MyD88
MBIP	14:36767763-36789882	Fluc	MyD88	7.59811	10.3982	0.452618	0.02745	0.295623	no	Fluc vs MyD88
ACCS	11:44087728-44105569	Fluc	MyD88	1.06173	0.610147	-0.799192	0.0275	0.295912	no	Fluc vs MyD88
PPA1	10:71962585-71993190	Fluc	MyD88	102.553	135.078	0.397428	0.0275	0.295912	no	Fluc vs MyD88
SLC27A1	19:17581299-17616977	Fluc	MyD88	2.5099	1.72467	-0.541315	0.02755	0.296196	no	Fluc vs MyD88
B4GALT6	18:29202208-29264686	Fluc	MyD88	2.38994	3.30278	0.466704	0.0276	0.296462	no	Fluc vs MyD88
LYAR	4:4269427-4291896	Fluc	MyD88	34.048	45.0278	0.403247	0.0276	0.296462	no	Fluc vs MyD88
RCL1	9:4792833-4861064	Fluc	MyD88	15.5385	20.8313	0.422909	0.02765	0.296775	no	Fluc vs MyD88
WASH1	9:11986-29739	Fluc	MyD88	4.22679	2.90653	-0.540265	0.02775	0.297345	no	Fluc vs MyD88
ADAM19	5:156904311-157002783	Fluc	MyD88	26.2419	34.5259	0.395809	0.02785	0.297928	no	Fluc vs MyD88
SERPING1	11:57365026-57382326	Fluc	MyD88	1.58805	0.974343	-0.704754	0.02785	0.297928	no	Fluc vs MyD88
CARS2	13:111293756-111358480	Fluc	MyD88	19.4521	14.4347	-0.430382	0.0279	0.298217	no	Fluc vs MyD88
LINC00460	13:107028910-107030140	Fluc	MyD88	0.362741	0.919067	1.34123	0.0279	0.298217	no	Fluc vs MyD88
SLC3A2	11:62623483-62656355	Fluc	MyD88	186.596	245.442	0.395462	0.02815	0.299832	no	Fluc vs MyD88
CCDC126	7:23636997-23684327	Fluc	MyD88	1.36021	2.0603	0.599019	0.0282	0.300088	no	Fluc vs MyD88
IKZF4	12:56414688-56432219	Fluc	MyD88	2.1755	1.53337	-0.504646	0.0282	0.300088	no	Fluc vs MyD88
PLIN3	19:4838345-4867780	Fluc	MyD88	49.8467	37.941	-0.393739	0.0282	0.300088	no	Fluc vs MyD88
OBSL1	2:220415449-220436268	Fluc	MyD88	22.2599	16.6267	-0.420948	0.02825	0.300389	no	Fluc vs MyD88
COQ10B	2:198318230-198339851	Fluc	MyD88	14.2814	19.1536	0.423479	0.0284	0.301388	no	Fluc vs MyD88
LLPH	12:66516848-66524533	Fluc	MyD88	51.4102	68.0919	0.405428	0.0284	0.301388	no	Fluc vs MyD88
SHB	9:37915894-38069210	Fluc	MyD88	6.81363	9.1221	0.420943	0.0284	0.301388	no	Fluc vs MyD88
GSTO1	10:106013951-106027222	Fluc	MyD88	83.825	110.228	0.395044	0.0285	0.302026	no	Fluc vs MyD88
KRT81	12:52679696-52685299	Fluc	MyD88	3.15117	4.49721	0.513143	0.02855	0.302346	no	Fluc vs MyD88
HOXD8	2:176994421-176997423	Fluc	MyD88	4.58014	3.1251	-0.551489	0.0286	0.302632	no	Fluc vs MyD88
TMA16	4:164415672-164441691	Fluc	MyD88	23.2297	30.8509	0.40934	0.0286	0.302632	no	Fluc vs MyD88
HRSP12	8:99114566-99129418	Fluc	MyD88	29.1295	39.0639	0.423356	0.02865	0.302959	no	Fluc vs MyD88
PIF1	15:65107830-65117838	Fluc	MyD88	7.07905	5.13319	-0.4637	0.02865	0.302959	no	Fluc vs MyD88
LPAR1	9:113636053-113800365	Fluc	MyD88	13.4826	10.0828	-0.419212	0.02875	0.303525	no	Fluc vs MyD88
C21orf91	21:19149720-19191703	Fluc	MyD88	3.80251	5.13808	0.43428	0.02885	0.30419	no	Fluc vs MyD88
CFLAR	2:201980876-202037411	Fluc	MyD88	4.1429	6.49915	0.64961	0.0289	0.304481	no	Fluc vs MyD88
LOC90246	3:128226677-128229438	Fluc	MyD88	0.62138	0.355499	-0.805633	0.02905	0.305396	no	Fluc vs MyD88
PGF	14:75408532-75422467	Fluc	MyD88	3.95863	2.71195	-0.54567	0.02905	0.305396	no	Fluc vs MyD88
SPRED2	2:65537984-65659656	Fluc	MyD88	7.64728	10.2322	0.420101	0.02905	0.305396	no	Fluc vs MyD88
EFEMP2	11:65627871-65640405	Fluc	MyD88	90.9459	65.5693	-0.471989	0.0291	0.305726	no	Fluc vs MyD88
SNHG5	6:86386724-86388451	Fluc	MyD88	152.23	200.913	0.40032	0.02915	0.306048	no	Fluc vs MyD88
LOC100508120	6:2245986-2413825	Fluc	MyD88	0.564405	0.219662	-1.36145	0.0292	0.306355	no	Fluc vs MyD88
ZBTB10	8:81398447-81434610	Fluc	MyD88	1.92637	2.6473	0.45864	0.02925	0.306643	no	Fluc vs MyD88
ADAMTS6	5:64444562-64777704	Fluc	MyD88	7.4016	9.82782	0.409034	0.0293	0.306908	no	Fluc vs MyD88
GREM1	15:33010204-33026870	Fluc	MyD88	140.624	184.3	0.390208	0.0293	0.306908	no	Fluc vs MyD88
CCHCR1	6:31110215-31126015	Fluc	MyD88	24.9728	18.8557	-0.405359	0.02935	0.307217	no	Fluc vs MyD88
STAT1	2:191833761-191878976	Fluc	MyD88	3.0198	2.12399	-0.507676	0.02935	0.307217	no	Fluc vs MyD88
MAP6	11:75297962-75379479	Fluc	MyD88	1.35116	0.884039	-0.612018	0.0294	0.307548	no	Fluc vs MyD88
NMD3	3:160939098-160969795	Fluc	MyD88	24.1254	31.747	0.396068	0.0294	0.307548	no	Fluc vs MyD88
FLJ20464	22:31742744-31744694	Fluc	MyD88	1.94187	1.23425	-0.653811	0.02945	0.307891	no	Fluc vs MyD88
ITPRIPL2	16:19125253-19132952	Fluc	MyD88	8.02786	10.6984	0.414302	0.0295	0.308218	no	Fluc vs MyD88
P4HTM	3:49027340-49044582	Fluc	MyD88	5.6392	4.01999	-0.488298	0.0295	0.308218	no	Fluc vs MyD88
ASPM	1:197053256-197115824	Fluc	MyD88	9.62113	7.25707	-0.406821	0.02955	0.308484	no	Fluc vs MyD88
NEFL	8:24808467-24814131	Fluc	MyD88	2.99254	4.12985	0.464717	0.0296	0.308836	no	Fluc vs MyD88
UST	6:149068270-149398126	Fluc	MyD88	2.39147	3.31081	0.469288	0.0296	0.308836	no	Fluc vs MyD88
2015-09-05	22:19701986-19712297	Fluc	MyD88	24.6447	17.8042	-0.469061	0.02965	0.309124	no	Fluc vs MyD88
TECPR1	7:97846035-97881468	Fluc	MyD88	4.81752	3.53658	-0.445938	0.0297	0.309442	no	Fluc vs MyD88
AKNA	9:117096428-117156685	Fluc	MyD88	1.23782	0.865763	-0.515759	0.02975	0.309759	no	Fluc vs MyD88
MFGE8	15:89441913-89456663	Fluc	MyD88	60.9936	46.4858	-0.391869	0.02975	0.309759	no	Fluc vs MyD88
PTN	7:136912087-137028546	Fluc	MyD88	11.3018	8.26664	-0.451178	0.02975	0.309759	no	Fluc vs MyD88
POMP	13:29233140-29253094	Fluc	MyD88	62.3799	82.4516	0.402467	0.0298	0.310057	no	Fluc vs MyD88
PPP1R26	9:138371647-138380739	Fluc	MyD88	11.3724	8.5409	-0.413075	0.0298	0.310057	no	Fluc vs MyD88
GSE1	16:85645028-85709812	Fluc	MyD88	7.67991	5.76417	-0.413976	0.02985	0.310313	no	Fluc vs MyD88
C16orf74	16:85741122-85784689	Fluc	MyD88	4.46001	2.84208	-0.650097	0.0299	0.310621	no	Fluc vs MyD88
SOGA2	18:8717368-8832775	Fluc	MyD88	11.579	8.72491	-0.408293	0.0299	0.310621	no	Fluc vs MyD88
SNORD89	2:101889397-101889511	Fluc	MyD88	0	61.9738	Inf	0.02995	0.310884	no	Fluc vs MyD88
ST6GAL1	3:186648314-186796341	Fluc	MyD88	0.997785	1.45159	0.540829	0.02995	0.310884	no	Fluc vs MyD88
ALDOC	17:26900132-26903951	Fluc	MyD88	15.6236	11.505	-0.441465	0.03005	0.311401	no	Fluc vs MyD88
NEU3	11:74699949-74718743	Fluc	MyD88	8.09661	5.95057	-0.444292	0.03005	0.311401	no	Fluc vs MyD88
NME3	16:1820320-1821710	Fluc	MyD88	8.40492	5.60444	-0.584664	0.03005	0.311401	no	Fluc vs MyD88
NUS1	6:117996616-118031890	Fluc	MyD88	29.04	38.0766	0.390866	0.0301	0.3117	no	Fluc vs MyD88
TMEM2	9:74298281-74383800	Fluc	MyD88	7.34887	9.70647	0.401424	0.0301	0.3117	no	Fluc vs MyD88
ISYNA1	19:18530145-18549111	Fluc	MyD88	2.78336	1.29246	-1.10671	0.03015	0.311999	no	Fluc vs MyD88
LMF2	22:50941375-50946135	Fluc	MyD88	39.9094	30.0431	-0.409696	0.03015	0.311999	no	Fluc vs MyD88
LRRC45	17:79981279-79989027	Fluc	MyD88	11.6562	8.66516	-0.427794	0.03015	0.311999	no	Fluc vs MyD88
DPYSL4	10:134000413-134019280	Fluc	MyD88	6.85478	4.99317	-0.457153	0.0302	0.312244	no	Fluc vs MyD88
UNC5B	10:72972291-73062635	Fluc	MyD88	1.23062	1.73348	0.494285	0.0302	0.312244	no	Fluc vs MyD88
NOP58	2:203130514-203168384	Fluc	MyD88	59.96	78.4053	0.386952	0.0303	0.312855	no	Fluc vs MyD88
RGS14	5:176784843-176799599	Fluc	MyD88	2.08569	1.37195	-0.604301	0.0303	0.312855	no	Fluc vs MyD88
TNFRSF10A	8:23048969-23082680	Fluc	MyD88	1.40074	0.862667	-0.699314	0.0303	0.312855	no	Fluc vs MyD88
DECR2	16:451857-462487	Fluc	MyD88	5.72666	3.98268	-0.523953	0.0304	0.31349	no	Fluc vs MyD88
LSM6	4:147096834-147111213	Fluc	MyD88	49.2183	65.7245	0.417238	0.03055	0.314392	no	Fluc vs MyD88
ZNF521	18:22641887-22932214	Fluc	MyD88	2.89118	2.0967	-0.463536	0.03055	0.314392	no	Fluc vs MyD88
TSPY26P	20:30776948-30778163	Fluc	MyD88	3.71793	2.45216	-0.600447	0.0306	0.31468	no	Fluc vs MyD88
USP16	21:30396937-30426809	Fluc	MyD88	29.8688	39.3102	0.396264	0.0306	0.31468	no	Fluc vs MyD88
PIP5KL1	9:130683807-130693076	Fluc	MyD88	1.41976	0.78997	-0.845778	0.03065	0.314967	no	Fluc vs MyD88
NOP16	5:175810939-175815763	Fluc	MyD88	51.4808	67.9088	0.399563	0.03075	0.315566	no	Fluc vs MyD88
SUSD1	9:114803060-114937556	Fluc	MyD88	5.96699	4.40626	-0.437447	0.03075	0.315566	no	Fluc vs MyD88
MPP2	17:41952726-41985113	Fluc	MyD88	10.0894	7.53618	-0.420939	0.03085	0.316122	no	Fluc vs MyD88
PRC1	15:91509267-91537881	Fluc	MyD88	95.0789	72.5039	-0.391066	0.03085	0.316122	no	Fluc vs MyD88
ERH	14:69846839-69865021	Fluc	MyD88	381.295	498.456	0.386558	0.0309	0.316438	no	Fluc vs MyD88
SH3RF1	4:170015406-170192249	Fluc	MyD88	10.6847	8.08231	-0.402708	0.0309	0.316438	no	Fluc vs MyD88
FGFR3	4:1795038-1810599	Fluc	MyD88	4.81034	3.53649	-0.443822	0.03095	0.316722	no	Fluc vs MyD88
COX6C	8:100890222-100906242	Fluc	MyD88	156.568	205.103	0.389558	0.03105	0.317301	no	Fluc vs MyD88
POLR2H	3:184081193-184086363	Fluc	MyD88	69.9619	92.6445	0.405136	0.03105	0.317301	no	Fluc vs MyD88
TGFB1	19:41836811-41859831	Fluc	MyD88	60.9578	46.3196	-0.396188	0.03105	0.317301	no	Fluc vs MyD88
PPAPDC1A	10:122216465-122349367	Fluc	MyD88	7.2169	5.03969	-0.518044	0.03115	0.317845	no	Fluc vs MyD88
LOC375295	2:177494308-177502302	Fluc	MyD88	6.37406	4.30803	-0.565186	0.03125	0.318372	no	Fluc vs MyD88
MDM2	12:69201970-69239320	Fluc	MyD88	17.7512	13.5828	-0.386137	0.0314	0.31928	no	Fluc vs MyD88
ZBTB8OS	1:33087304-33116185	Fluc	MyD88	21.8912	29.7813	0.444058	0.0314	0.31928	no	Fluc vs MyD88
GATA6	18:19749403-19782491	Fluc	MyD88	2.78861	3.88386	0.477944	0.03145	0.319599	no	Fluc vs MyD88
GYS1	19:49471381-49496610	Fluc	MyD88	30.1408	22.9268	-0.394684	0.03155	0.320136	no	Fluc vs MyD88
KIAA1731	11:93394815-93463522	Fluc	MyD88	5.72933	4.30093	-0.413716	0.03155	0.320136	no	Fluc vs MyD88
BEX1	X:102317580-102319168	Fluc	MyD88	92.451	121.541	0.394684	0.03165	0.320686	no	Fluc vs MyD88
LFNG	7:2552162-2568811	Fluc	MyD88	6.15148	8.53423	0.472327	0.03165	0.320686	no	Fluc vs MyD88
LOC441402	9:40490464-40633956	Fluc	MyD88	0.640445	0.346601	-0.885799	0.03175	0.321273	no	Fluc vs MyD88
MAMDC4	9:139746818-139755251	Fluc	MyD88	5.71212	4.14278	-0.463426	0.03175	0.321273	no	Fluc vs MyD88
TMEM33	4:41937136-41962824	Fluc	MyD88	7.28871	9.70295	0.41276	0.0318	0.321502	no	Fluc vs MyD88
WAC-AS1	10:28808845-28821283	Fluc	MyD88	21.3255	27.8692	0.38609	0.0318	0.321502	no	Fluc vs MyD88
ADCK4	19:41197433-41222790	Fluc	MyD88	4.61249	3.26421	-0.49881	0.03185	0.321802	no	Fluc vs MyD88
PNRC1	6:89790428-89794879	Fluc	MyD88	5.40711	7.4635	0.464994	0.0319	0.322048	no	Fluc vs MyD88
EFNA1	1:155100348-155107386	Fluc	MyD88	0.97305	1.59393	0.711999	0.03195	0.322306	no	Fluc vs MyD88
IFT122	3:129158967-129239191	Fluc	MyD88	7.6133	5.68025	-0.422567	0.03215	0.323522	no	Fluc vs MyD88
SSR3	3:156257928-156272973	Fluc	MyD88	86.9567	113.359	0.382524	0.03215	0.323522	no	Fluc vs MyD88
DENND1B	1:197473877-197744623	Fluc	MyD88	1.00316	0.637229	-0.654671	0.0322	0.323858	no	Fluc vs MyD88
OGFRL1	6:71998476-72011973	Fluc	MyD88	6.3918	4.6374	-0.462905	0.03225	0.324117	no	Fluc vs MyD88
SPPL2B	19:2328628-2355100	Fluc	MyD88	5.82591	4.25275	-0.454088	0.03235	0.324664	no	Fluc vs MyD88
EMID1	22:29601900-29655586	Fluc	MyD88	1.18975	0.723866	-0.716867	0.03245	0.325248	no	Fluc vs MyD88
LOC100506844	12:58325231-58329947	Fluc	MyD88	14.5363	10.2971	-0.497423	0.03245	0.325248	no	Fluc vs MyD88
FBF1	17:73906617-73937119	Fluc	MyD88	5.58918	4.1298	-0.436565	0.0325	0.325547	no	Fluc vs MyD88
TCEA2	20:62688438-62703700	Fluc	MyD88	13.2933	9.8451	-0.43322	0.0325	0.325547	no	Fluc vs MyD88
TMCO1	1:165693527-165738159	Fluc	MyD88	24.1259	31.5567	0.387365	0.0325	0.325547	no	Fluc vs MyD88
NLRP1	17:5404718-5487832	Fluc	MyD88	5.14804	3.82693	-0.427836	0.03265	0.326381	no	Fluc vs MyD88
HSPA13	21:15743435-15755509	Fluc	MyD88	27.2117	35.6496	0.389661	0.0327	0.326648	no	Fluc vs MyD88
AGSK1	15:82753446-82798323	Fluc	MyD88	2.4686	1.39051	-0.828076	0.03275	0.326899	no	Fluc vs MyD88
PAQR3	4:79839093-79860582	Fluc	MyD88	8.49556	11.3357	0.416086	0.03275	0.326899	no	Fluc vs MyD88
THY1	11:119252487-119369944	Fluc	MyD88	98.3208	75.2227	-0.38633	0.03275	0.326899	no	Fluc vs MyD88
P2RX4	12:121647663-121671909	Fluc	MyD88	5.1779	3.69231	-0.487845	0.0328	0.327204	no	Fluc vs MyD88
TMSB10	2:85132762-85133799	Fluc	MyD88	4668.07	3536	-0.400708	0.03285	0.327454	no	Fluc vs MyD88
ZNF706	8:102209265-102218292	Fluc	MyD88	13.3671	17.7029	0.405297	0.03285	0.327454	no	Fluc vs MyD88
LURAP1L	9:12775011-12823059	Fluc	MyD88	1.66509	2.43568	0.548726	0.0329	0.327796	no	Fluc vs MyD88
ZBTB8B	1:32930657-32953460	Fluc	MyD88	0.551157	0.333233	-0.725931	0.03295	0.328092	no	Fluc vs MyD88
ZNF699	19:9405985-9415795	Fluc	MyD88	5.13765	3.70587	-0.471295	0.03295	0.328092	no	Fluc vs MyD88
CALM3	19:47104511-47114039	Fluc	MyD88	271.047	208.673	-0.377293	0.033	0.328387	no	Fluc vs MyD88
POLR1C	6:43484776-43489251	Fluc	MyD88	31.7757	42.1159	0.406443	0.033	0.328387	no	Fluc vs MyD88
GMPR	6:16238810-16295780	Fluc	MyD88	1.41276	0.845422	-0.740771	0.03305	0.32872	no	Fluc vs MyD88
F2R	5:76011867-76031595	Fluc	MyD88	27.7623	21.181	-0.390352	0.0332	0.329568	no	Fluc vs MyD88
PALLD	4:169418216-169849608	Fluc	MyD88	13.7032	10.3943	-0.398729	0.0332	0.329568	no	Fluc vs MyD88
IRS1	2:227596032-227663506	Fluc	MyD88	6.47384	4.86814	-0.411252	0.03325	0.329824	no	Fluc vs MyD88
RNF182	6:13924676-13980240	Fluc	MyD88	10.4735	7.8143	-0.422558	0.0333	0.330109	no	Fluc vs MyD88
RRN3	16:15153878-15188158	Fluc	MyD88	24.2506	31.6975	0.386348	0.0333	0.330109	no	Fluc vs MyD88
ARHGEF17	11:73018279-73080425	Fluc	MyD88	19.3501	14.7797	-0.388724	0.03335	0.330402	no	Fluc vs MyD88
FICD	12:108909050-108913380	Fluc	MyD88	3.29054	2.23452	-0.558357	0.03335	0.330402	no	Fluc vs MyD88
C12orf68	12:48577365-48579709	Fluc	MyD88	0.599702	1.0084	0.749749	0.0334	0.330656	no	Fluc vs MyD88
HDGFRP2	19:4472254-4517716	Fluc	MyD88	43.0773	32.8773	-0.389835	0.0334	0.330656	no	Fluc vs MyD88
HFE	6:26087508-26095469	Fluc	MyD88	4.64248	3.33548	-0.477001	0.0334	0.330656	no	Fluc vs MyD88
NRSN2	20:327369-335512	Fluc	MyD88	31.7977	24.1022	-0.39976	0.0334	0.330656	no	Fluc vs MyD88
PDCD5	19:33072093-33078358	Fluc	MyD88	160.645	210.812	0.392077	0.0334	0.330656	no	Fluc vs MyD88
PPOX	1:161136180-161141010	Fluc	MyD88	5.35467	3.76703	-0.507372	0.0335	0.331205	no	Fluc vs MyD88
SLC8A1	2:40144773-40739575	Fluc	MyD88	4.20027	3.14325	-0.418226	0.03355	0.331542	no	Fluc vs MyD88
CYP2S1	19:41699114-41713444	Fluc	MyD88	1.3108	0.836982	-0.647175	0.0336	0.33178	no	Fluc vs MyD88
GSTK1	7:142960521-142966222	Fluc	MyD88	27.0007	20.1807	-0.42002	0.0337	0.332387	no	Fluc vs MyD88
MIR210HG	11:565656-568457	Fluc	MyD88	5.2081	3.73863	-0.478249	0.0337	0.332387	no	Fluc vs MyD88
SMNDC1	10:112052797-112064707	Fluc	MyD88	23.3491	30.8954	0.404027	0.0337	0.332387	no	Fluc vs MyD88
ALG2	9:101978706-101984246	Fluc	MyD88	17.7148	23.2748	0.393808	0.03375	0.332693	no	Fluc vs MyD88
NEGR1	1:71868624-72748277	Fluc	MyD88	1.51816	1.08597	-0.483339	0.03375	0.332693	no	Fluc vs MyD88
LOC100507291	3:139108650-139163446	Fluc	MyD88	0.444945	1.00303	1.17266	0.0338	0.332986	no	Fluc vs MyD88
SPATA13	13:24734860-24881212	Fluc	MyD88	2.68042	3.60437	0.42729	0.0338	0.332986	no	Fluc vs MyD88
AUTS2	7:69063904-70257885	Fluc	MyD88	7.42551	5.54295	-0.421836	0.03385	0.333268	no	Fluc vs MyD88
TCIRG1	11:67806461-67818366	Fluc	MyD88	29.2694	22.1075	-0.404858	0.03385	0.333268	no	Fluc vs MyD88
CAMK2N1	1:20808883-20812728	Fluc	MyD88	2.91629	4.11773	0.497716	0.0339	0.333533	no	Fluc vs MyD88
SMAD1	4:146402950-146480328	Fluc	MyD88	5.89481	7.94662	0.430897	0.0339	0.333533	no	Fluc vs MyD88
USP12	13:27640286-27746033	Fluc	MyD88	10.1026	13.3579	0.402957	0.0339	0.333533	no	Fluc vs MyD88
KRT15	17:39669996-39675270	Fluc	MyD88	0.455475	0.218372	-1.06059	0.03395	0.333806	no	Fluc vs MyD88
IER3IP1	18:44681389-44702745	Fluc	MyD88	61.0724	79.943	0.388452	0.034	0.334137	no	Fluc vs MyD88
AURKC	19:57742376-57746916	Fluc	MyD88	0.137362	0.418754	1.60812	0.03405	0.334386	no	Fluc vs MyD88
AZIN1	8:103838535-103876397	Fluc	MyD88	37.8479	49.1462	0.376865	0.03405	0.334386	no	Fluc vs MyD88
LACTB2	8:71520811-71581447	Fluc	MyD88	4.03369	5.688	0.49582	0.03405	0.334386	no	Fluc vs MyD88
RETSAT	2:85569077-85581821	Fluc	MyD88	13.3722	10.0479	-0.412347	0.03415	0.334876	no	Fluc vs MyD88
PKN1	19:14544165-14582679	Fluc	MyD88	20.4604	15.5641	-0.39461	0.0342	0.33514	no	Fluc vs MyD88
RHOB	2:20646834-20649201	Fluc	MyD88	75.5731	98.3987	0.380765	0.0342	0.33514	no	Fluc vs MyD88
CROCCP3	1:16793930-16819196	Fluc	MyD88	0.628473	0.405288	-0.632903	0.03425	0.335395	no	Fluc vs MyD88
NAA20	20:19997933-20014273	Fluc	MyD88	118.038	152.993	0.374215	0.03425	0.335395	no	Fluc vs MyD88
NACAD	7:45120035-45128493	Fluc	MyD88	4.77705	3.53414	-0.43476	0.03425	0.335395	no	Fluc vs MyD88
LBH	2:30454396-30482899	Fluc	MyD88	9.18597	6.84354	-0.424688	0.0343	0.335697	no	Fluc vs MyD88
LYPLAL1	1:219347191-219386207	Fluc	MyD88	2.10612	3.08567	0.550995	0.0343	0.335697	no	Fluc vs MyD88
RPL34	4:109541721-109551640	Fluc	MyD88	284.78	369.318	0.375015	0.03435	0.335936	no	Fluc vs MyD88
AIMP1	4:106967232-107270382	Fluc	MyD88	22.9527	30.3225	0.40172	0.0345	0.336745	no	Fluc vs MyD88
KLHL5	4:39046450-39127853	Fluc	MyD88	6.03043	7.91002	0.39142	0.03455	0.337002	no	Fluc vs MyD88
CIC	19:42788816-42799949	Fluc	MyD88	15.1036	11.4896	-0.394565	0.0346	0.337198	no	Fluc vs MyD88
ADAMTS7	15:79051544-79103773	Fluc	MyD88	2.34317	1.68896	-0.472328	0.03475	0.338005	no	Fluc vs MyD88
C1D	2:68269331-68290159	Fluc	MyD88	22.1624	29.5435	0.414722	0.03485	0.338551	no	Fluc vs MyD88
HMGCS1	5:43287571-43313614	Fluc	MyD88	19.5624	25.4859	0.381621	0.0349	0.338829	no	Fluc vs MyD88
MRPL13	8:121408082-121535875	Fluc	MyD88	56.7602	76.7458	0.435209	0.035	0.339357	no	Fluc vs MyD88
PRTG	15:55903737-56035177	Fluc	MyD88	0.715266	0.994574	0.475599	0.035	0.339357	no	Fluc vs MyD88
ATP10A	15:25923858-26108349	Fluc	MyD88	0.90015	0.60749	-0.567304	0.03505	0.339599	no	Fluc vs MyD88
C1orf198	1:230972864-231005335	Fluc	MyD88	8.58894	6.46616	-0.409571	0.03505	0.339599	no	Fluc vs MyD88
CYP2E1	10:135340866-135352620	Fluc	MyD88	0.530986	0.237982	-1.15782	0.03505	0.339599	no	Fluc vs MyD88
ZNF720	16:31724549-31772886	Fluc	MyD88	1.9059	2.6985	0.501683	0.03505	0.339599	no	Fluc vs MyD88
SLC52A1	17:4935896-4938727	Fluc	MyD88	1.1509	0.684566	-0.749504	0.03515	0.340113	no	Fluc vs MyD88
HLA-E	6:30457182-30461982	Fluc	MyD88	58.3479	76.046	0.382191	0.0352	0.340382	no	Fluc vs MyD88
USP20	9:132597695-132644107	Fluc	MyD88	4.57407	3.40217	-0.427021	0.03535	0.341119	no	Fluc vs MyD88
UBXN11	1:26608772-26647014	Fluc	MyD88	11.0263	8.11451	-0.442372	0.03545	0.341625	no	Fluc vs MyD88
CDK2AP2	11:67273967-67276102	Fluc	MyD88	33.2129	24.8673	-0.417491	0.03555	0.342169	no	Fluc vs MyD88
C19orf68	19:48675209-48700516	Fluc	MyD88	6.11197	4.37919	-0.480973	0.0356	0.34245	no	Fluc vs MyD88
SPDYE8P	7:72490259-72500309	Fluc	MyD88	0.471225	0.257249	-0.873248	0.0356	0.34245	no	Fluc vs MyD88
ACER2	9:19408924-19452500	Fluc	MyD88	0.870783	0.522537	-0.736779	0.0358	0.343555	no	Fluc vs MyD88
PEX11G	19:7541755-7553924	Fluc	MyD88	0.649897	0.19478	-1.73837	0.03585	0.343795	no	Fluc vs MyD88
DCP2	5:112312406-112824527	Fluc	MyD88	3.87438	5.17983	0.418939	0.03595	0.344364	no	Fluc vs MyD88
CORO2B	15:68871307-69020145	Fluc	MyD88	2.33376	1.64446	-0.505038	0.036	0.34467	no	Fluc vs MyD88
KIFC1	6:33359312-33377701	Fluc	MyD88	63.4831	48.6818	-0.38299	0.036	0.34467	no	Fluc vs MyD88
DRP2	X:100474932-100519485	Fluc	MyD88	0.860914	0.598599	-0.524279	0.03605	0.345002	no	Fluc vs MyD88
UTP15	5:72861597-72877794	Fluc	MyD88	9.70763	12.9186	0.412258	0.03605	0.345002	no	Fluc vs MyD88
DENND5B	12:31535156-31768285	Fluc	MyD88	4.31176	3.26087	-0.403022	0.0362	0.345783	no	Fluc vs MyD88
IL15	4:142557748-142655140	Fluc	MyD88	0.351789	0.637166	0.856956	0.03625	0.346022	no	Fluc vs MyD88
RPL22L1	3:170582663-170588045	Fluc	MyD88	25.5507	33.6294	0.396359	0.03625	0.346022	no	Fluc vs MyD88
RSL1D1	16:11928052-11945442	Fluc	MyD88	50.1765	65.2176	0.37825	0.0364	0.346776	no	Fluc vs MyD88
GEMIN6	2:39005326-39009107	Fluc	MyD88	29.5667	39.5152	0.418434	0.03645	0.347044	no	Fluc vs MyD88
ZNF674	X:46357159-46404892	Fluc	MyD88	0.449097	0.689133	0.617756	0.03645	0.347044	no	Fluc vs MyD88
AP1B1	22:29723668-29784572	Fluc	MyD88	29.9027	23.0264	-0.37699	0.0365	0.3473	no	Fluc vs MyD88
GAS1	9:89559276-89562104	Fluc	MyD88	1.44846	2.14198	0.564422	0.0365	0.3473	no	Fluc vs MyD88
EIF3E	8:109213971-109260959	Fluc	MyD88	185.383	240.321	0.374458	0.03655	0.347551	no	Fluc vs MyD88
ATP6V0E1	5:172410762-172461900	Fluc	MyD88	85.0458	111.424	0.389752	0.0366	0.347787	no	Fluc vs MyD88
GPR153	1:6307405-6321035	Fluc	MyD88	1.77136	1.21765	-0.540751	0.0366	0.347787	no	Fluc vs MyD88
RARRES3	11:63304272-63313930	Fluc	MyD88	2.07899	3.43369	0.723879	0.0366	0.347787	no	Fluc vs MyD88
INADL	1:62208148-62629592	Fluc	MyD88	0.427612	0.286771	-0.576404	0.0367	0.348319	no	Fluc vs MyD88
ZNF644	1:91380854-91487812	Fluc	MyD88	9.14114	12.4007	0.439971	0.03675	0.348604	no	Fluc vs MyD88
LATS2	13:21547174-21635722	Fluc	MyD88	14.7268	11.2802	-0.384649	0.0368	0.348885	no	Fluc vs MyD88
CST3	20:23614293-23618574	Fluc	MyD88	86.3633	65.1217	-0.407281	0.03685	0.349166	no	Fluc vs MyD88
FNDC3B	3:171757417-172118493	Fluc	MyD88	15.2987	19.831	0.374347	0.03685	0.349166	no	Fluc vs MyD88
IFFO1	12:6648693-6665249	Fluc	MyD88	9.491	7.07335	-0.424167	0.0369	0.349473	no	Fluc vs MyD88
TUBGCP6	22:50656117-50683400	Fluc	MyD88	9.58596	7.26606	-0.39975	0.0369	0.349473	no	Fluc vs MyD88
PLXNB2	22:50713407-50746001	Fluc	MyD88	34.0324	26.1426	-0.380502	0.03695	0.349753	no	Fluc vs MyD88
DFNB31	9:117164359-117267736	Fluc	MyD88	2.59893	1.80863	-0.523021	0.03715	0.350657	no	Fluc vs MyD88
XYLT1	16:17196180-17564738	Fluc	MyD88	36.369	28.0012	-0.377223	0.0372	0.350939	no	Fluc vs MyD88
KLK14	19:51581153-51587502	Fluc	MyD88	0.16857	0.587738	1.80182	0.03745	0.352342	no	Fluc vs MyD88
TNFAIP8L1	19:4639526-4655580	Fluc	MyD88	3.41811	2.49411	-0.45467	0.03745	0.352342	no	Fluc vs MyD88
SPAG4	20:34203808-34208965	Fluc	MyD88	1.9807	1.23701	-0.679158	0.0376	0.353171	no	Fluc vs MyD88
DSE	6:116601282-116759442	Fluc	MyD88	21.4283	27.8508	0.378201	0.03765	0.353411	no	Fluc vs MyD88
GRB10	7:50657759-50861159	Fluc	MyD88	10.9806	8.32958	-0.398635	0.03765	0.353411	no	Fluc vs MyD88
SACS	13:23902964-24007841	Fluc	MyD88	10.6769	13.8873	0.379266	0.03765	0.353411	no	Fluc vs MyD88
HSPA2	14:65007185-65009955	Fluc	MyD88	9.85032	7.40858	-0.410973	0.0377	0.353671	no	Fluc vs MyD88
SLC38A9	5:54921672-55008163	Fluc	MyD88	5.80544	7.82533	0.430746	0.03775	0.353903	no	Fluc vs MyD88
CXorf26	X:75392770-75398033	Fluc	MyD88	19.2659	25.4698	0.402739	0.03785	0.354414	no	Fluc vs MyD88
MYEF2	15:48413168-48470558	Fluc	MyD88	2.62705	1.93373	-0.442059	0.03785	0.354414	no	Fluc vs MyD88
NPAS1	19:47524142-47549017	Fluc	MyD88	1.02899	0.596226	-0.787298	0.03785	0.354414	no	Fluc vs MyD88
SCOC	4:141178439-141303710	Fluc	MyD88	28.7313	37.6214	0.388933	0.03785	0.354414	no	Fluc vs MyD88
TRPM4	19:49661015-49715098	Fluc	MyD88	4.19319	3.06208	-0.453535	0.03795	0.354993	no	Fluc vs MyD88
UBE2E1	3:23847383-23933131	Fluc	MyD88	59.509	77.0677	0.373017	0.03795	0.354993	no	Fluc vs MyD88
ANKRD46	8:101521979-101572014	Fluc	MyD88	2.45956	3.4542	0.48995	0.0381	0.355781	no	Fluc vs MyD88
ITGB3	17:45331207-45390077	Fluc	MyD88	2.73301	3.67927	0.428928	0.0382	0.356349	no	Fluc vs MyD88
NIP7	16:69362523-69377014	Fluc	MyD88	40.0569	54.6662	0.448599	0.03825	0.356641	no	Fluc vs MyD88
IDUA	4:972860-998317	Fluc	MyD88	1.34872	0.710038	-0.925619	0.0383	0.356924	no	Fluc vs MyD88
SGSM2	17:2240805-2284348	Fluc	MyD88	18.7179	14.3866	-0.379686	0.0383	0.356924	no	Fluc vs MyD88
MFAP4	17:19240866-19290532	Fluc	MyD88	4.86781	2.04326	-1.2524	0.03835	0.357192	no	Fluc vs MyD88
CCL28	5:43381599-43412488	Fluc	MyD88	0.909498	0.350912	-1.37396	0.0385	0.357996	no	Fluc vs MyD88
FLI1	11:128556429-128683162	Fluc	MyD88	6.34309	8.42094	0.408794	0.0385	0.357996	no	Fluc vs MyD88
ADAMTS16	5:5140442-5320412	Fluc	MyD88	1.3771	1.91807	0.478023	0.03855	0.358228	no	Fluc vs MyD88
ORAI3	16:30960404-30966259	Fluc	MyD88	2.61432	1.73951	-0.587756	0.0386	0.358497	no	Fluc vs MyD88
2015-09-03	22:42372930-42394225	Fluc	MyD88	0.98146	0.655119	-0.583173	0.03865	0.358794	no	Fluc vs MyD88
SLC26A11	17:78194199-78227308	Fluc	MyD88	4.86097	3.52791	-0.462431	0.03865	0.358794	no	Fluc vs MyD88
PCYT2	17:79860071-79869340	Fluc	MyD88	12.4188	9.41125	-0.400063	0.0387	0.359099	no	Fluc vs MyD88
NADSYN1	11:71164216-71212584	Fluc	MyD88	15.5099	11.7694	-0.398152	0.0388	0.359664	no	Fluc vs MyD88
PTS	11:112097087-112104696	Fluc	MyD88	15.8389	21.2892	0.426652	0.03885	0.35989	no	Fluc vs MyD88
SUGT1	13:53226830-53262433	Fluc	MyD88	36.6383	47.634	0.378639	0.03885	0.35989	no	Fluc vs MyD88
CASP6	4:110609784-110624629	Fluc	MyD88	6.91779	5.02582	-0.460952	0.0389	0.360103	no	Fluc vs MyD88
SOCS1	16:11348273-11350039	Fluc	MyD88	2.83145	4.3744	0.627544	0.03905	0.360851	no	Fluc vs MyD88
SRPRB	3:133502876-133540336	Fluc	MyD88	34.3156	44.7019	0.381473	0.03905	0.360851	no	Fluc vs MyD88
SLC22A3	6:160769404-160873611	Fluc	MyD88	0.741773	1.11811	0.592014	0.0391	0.361095	no	Fluc vs MyD88
BEND6	6:56819772-56892144	Fluc	MyD88	2.77914	1.96796	-0.497943	0.03915	0.361303	no	Fluc vs MyD88
SYPL1	7:105730813-105753093	Fluc	MyD88	47.6784	61.7352	0.372759	0.0392	0.361527	no	Fluc vs MyD88
CBX3	7:26240830-26253227	Fluc	MyD88	149.692	193.405	0.369633	0.03925	0.361766	no	Fluc vs MyD88
LIAS	4:39460664-39479273	Fluc	MyD88	6.00305	8.13031	0.437614	0.03925	0.361766	no	Fluc vs MyD88
NBPF1	1:16890411-16939982	Fluc	MyD88	9.34378	7.10097	-0.395989	0.0393	0.362035	no	Fluc vs MyD88
TBCD	17:80709939-80901062	Fluc	MyD88	23.1713	17.8641	-0.375277	0.0393	0.362035	no	Fluc vs MyD88
HES6	2:239146907-239148681	Fluc	MyD88	1.98595	1.20908	-0.715926	0.0396	0.363425	no	Fluc vs MyD88
SLC2A4RG	20:62371210-62436856	Fluc	MyD88	44.8705	33.5076	-0.421276	0.0396	0.363425	no	Fluc vs MyD88
APOL3	22:36536370-36562225	Fluc	MyD88	0.216642	0.399686	0.883557	0.03975	0.364243	no	Fluc vs MyD88
CCDC57	17:80059345-80170689	Fluc	MyD88	6.21349	4.61995	-0.427527	0.03975	0.364243	no	Fluc vs MyD88
DNAJC4	11:63997752-64001753	Fluc	MyD88	8.92774	6.37539	-0.485781	0.03975	0.364243	no	Fluc vs MyD88
ESYT1	12:56521985-56538460	Fluc	MyD88	52.8512	40.9655	-0.367527	0.03975	0.364243	no	Fluc vs MyD88
SGPP2	2:223289321-223423617	Fluc	MyD88	0.709204	0.252852	-1.48791	0.0398	0.364491	no	Fluc vs MyD88
HDAC6	X:48660486-48683380	Fluc	MyD88	13.9314	10.6197	-0.391606	0.03985	0.364757	no	Fluc vs MyD88
IMPA2	18:11981426-12030885	Fluc	MyD88	2.73825	1.80366	-0.602326	0.03985	0.364757	no	Fluc vs MyD88
NAPG	18:10525872-10552766	Fluc	MyD88	9.06972	11.9842	0.402009	0.04	0.365516	no	Fluc vs MyD88
SSB	2:170655321-170681353	Fluc	MyD88	95.0316	124.903	0.394335	0.04005	0.365762	no	Fluc vs MyD88
SUMO1	2:203070902-203103322	Fluc	MyD88	106.043	137.668	0.376542	0.04005	0.365762	no	Fluc vs MyD88
CIB2	15:78396990-78423878	Fluc	MyD88	5.58712	3.96781	-0.493763	0.04015	0.366273	no	Fluc vs MyD88
CRISPLD1	8:75896707-75946793	Fluc	MyD88	0.528225	0.331769	-0.670974	0.0403	0.367062	no	Fluc vs MyD88
IRF9	14:24630421-24635774	Fluc	MyD88	7.79494	5.71952	-0.446643	0.04035	0.367294	no	Fluc vs MyD88
FAM72D	1:143896451-143913143	Fluc	MyD88	6.78995	9.06489	0.416889	0.04045	0.367805	no	Fluc vs MyD88
DCAKD	17:43100705-43138473	Fluc	MyD88	12.1097	9.07355	-0.416422	0.0405	0.368072	no	Fluc vs MyD88
TFAP2C	20:55204357-55214339	Fluc	MyD88	9.52166	12.5706	0.40077	0.04055	0.368331	no	Fluc vs MyD88
TMEM126B	11:85339616-85347583	Fluc	MyD88	47.8622	62.5382	0.385851	0.0406	0.368601	no	Fluc vs MyD88
ADAMTSL5	19:1505016-1513188	Fluc	MyD88	2.03147	1.36554	-0.573051	0.04075	0.369379	no	Fluc vs MyD88
CDK5RAP2	9:123151146-123342437	Fluc	MyD88	18.7191	14.5074	-0.367722	0.0408	0.369629	no	Fluc vs MyD88
THNSL1	10:25270907-25351208	Fluc	MyD88	0.774805	1.13695	0.553258	0.0409	0.370088	no	Fluc vs MyD88
MAT2B	5:162930230-162946328	Fluc	MyD88	34.3325	44.3201	0.368388	0.04095	0.370293	no	Fluc vs MyD88
TCN2	22:31003069-31023047	Fluc	MyD88	0.632082	0.336227	-0.910675	0.04095	0.370293	no	Fluc vs MyD88
TNKS1BP1	11:57067102-57092413	Fluc	MyD88	30.2968	39.0258	0.365263	0.04095	0.370293	no	Fluc vs MyD88
ZNF221	19:44455396-44471752	Fluc	MyD88	0.893029	0.572296	-0.641946	0.04105	0.370716	no	Fluc vs MyD88
DLG3	X:69664704-69725340	Fluc	MyD88	2.90091	2.15402	-0.429475	0.0412	0.371427	no	Fluc vs MyD88
GNL1	6:30509153-30532473	Fluc	MyD88	10.8075	14.1762	0.39144	0.0412	0.371427	no	Fluc vs MyD88
2015-09-15	1:87328127-87380107	Fluc	MyD88	70.3753	90.7781	0.367275	0.04125	0.371647	no	Fluc vs MyD88
TMCO3	13:114145307-114204544	Fluc	MyD88	24.5651	18.8922	-0.378816	0.04125	0.371647	no	Fluc vs MyD88
PHLDB3	19:43979254-44008985	Fluc	MyD88	5.58451	4.12938	-0.435503	0.0413	0.371894	no	Fluc vs MyD88
BMP1	8:22022652-22069839	Fluc	MyD88	36.7199	47.7251	0.378188	0.04135	0.37207	no	Fluc vs MyD88
RNU5A-1	15:65588388-65588505	Fluc	MyD88	0	49.4739	Inf	0.04135	0.37207	no	Fluc vs MyD88
MARS2	2:198570027-198573114	Fluc	MyD88	2.20307	3.09683	0.491275	0.0415	0.372765	no	Fluc vs MyD88
MVP	16:29827527-29859360	Fluc	MyD88	13.9277	8.84421	-0.655147	0.0415	0.372765	no	Fluc vs MyD88
NDOR1	9:140100118-140113813	Fluc	MyD88	17.9983	13.8597	-0.376969	0.0415	0.372765	no	Fluc vs MyD88
TJP1	15:29992355-30114706	Fluc	MyD88	14.4103	11.1325	-0.372326	0.04155	0.373038	no	Fluc vs MyD88
LSR	19:35739558-35758867	Fluc	MyD88	1.46346	0.942412	-0.634951	0.0416	0.373303	no	Fluc vs MyD88
BNIP3	10:133781203-133795435	Fluc	MyD88	202.653	157.298	-0.365515	0.04165	0.373544	no	Fluc vs MyD88
EP400NL	12:132568827-132610885	Fluc	MyD88	2.75729	1.83837	-0.584824	0.04175	0.374013	no	Fluc vs MyD88
RTKN2	10:63952952-64028466	Fluc	MyD88	1.00707	0.708169	-0.507997	0.04175	0.374013	no	Fluc vs MyD88
ZNF516	18:74069636-74207146	Fluc	MyD88	1.61283	1.18178	-0.448637	0.04175	0.374013	no	Fluc vs MyD88
RAB26	16:2198650-2204141	Fluc	MyD88	0.555169	0.259667	-1.09626	0.04195	0.37489	no	Fluc vs MyD88
FAM206A	9:111696672-111703238	Fluc	MyD88	19.6421	25.7697	0.391726	0.04215	0.375779	no	Fluc vs MyD88
ZNHIT6	1:86115105-86174116	Fluc	MyD88	10.6821	13.8461	0.374276	0.04215	0.375779	no	Fluc vs MyD88
ABTB1	3:127391780-127399769	Fluc	MyD88	4.37324	6.01401	0.459623	0.04225	0.376254	no	Fluc vs MyD88
HOXD9	2:176987412-176989645	Fluc	MyD88	5.27315	3.76894	-0.484505	0.0423	0.376508	no	Fluc vs MyD88
CHORDC1	11:89933596-89956532	Fluc	MyD88	47.8149	61.6463	0.366554	0.04235	0.376741	no	Fluc vs MyD88
SRGAP1	12:64238540-64541613	Fluc	MyD88	2.60734	3.45194	0.404832	0.0425	0.377385	no	Fluc vs MyD88
LOC100996528	16:3096681-3110727	Fluc	MyD88	2.02778	3.7761	0.897	0.0427	0.37836	no	Fluc vs MyD88
TGFB2	1:218517537-218617961	Fluc	MyD88	17.4504	22.3937	0.359836	0.04275	0.378607	no	Fluc vs MyD88
UQCRB	8:97238903-97247862	Fluc	MyD88	49.6118	63.5636	0.357518	0.04285	0.379061	no	Fluc vs MyD88
FAM64A	17:6347734-6354385	Fluc	MyD88	34.7221	26.6123	-0.383759	0.04295	0.379541	no	Fluc vs MyD88
STAT3	17:40465342-40540513	Fluc	MyD88	26.8169	20.7683	-0.368756	0.04295	0.379541	no	Fluc vs MyD88
EIF4E	4:99799606-99851786	Fluc	MyD88	30.7456	39.784	0.371809	0.04305	0.380016	no	Fluc vs MyD88
PLEC	8:144989320-145050913	Fluc	MyD88	40.3715	31.279	-0.368145	0.0431	0.380269	no	Fluc vs MyD88
ZNF805	19:57752052-57774106	Fluc	MyD88	0.722694	1.00125	0.470349	0.0431	0.380269	no	Fluc vs MyD88
CCL7	17:32597239-32599256	Fluc	MyD88	0.383976	0.972162	1.34018	0.04315	0.380546	no	Fluc vs MyD88
DEF6	6:35265594-35289548	Fluc	MyD88	0.571912	0.316741	-0.852489	0.04315	0.380546	no	Fluc vs MyD88
SELT	3:150321065-150348234	Fluc	MyD88	24.4473	31.5924	0.369906	0.0433	0.381318	no	Fluc vs MyD88
OSTC	4:109571740-109588978	Fluc	MyD88	65.4777	84.4393	0.366911	0.04335	0.381558	no	Fluc vs MyD88
RAET1K	6:150319154-150326280	Fluc	MyD88	1.42977	0.929887	-0.620653	0.0434	0.381806	no	Fluc vs MyD88
AZI1	17:79163392-79196751	Fluc	MyD88	13.7259	10.5484	-0.379869	0.04345	0.382042	no	Fluc vs MyD88
D2HGDH	2:242674029-242708231	Fluc	MyD88	3.79852	2.72567	-0.47883	0.04345	0.382042	no	Fluc vs MyD88
ERBB2IP	5:65222381-65376851	Fluc	MyD88	25.5666	19.8312	-0.366489	0.0435	0.38223	no	Fluc vs MyD88
ING3	7:120590816-120615711	Fluc	MyD88	8.30089	11.2138	0.433935	0.0435	0.38223	no	Fluc vs MyD88
PDCL3	2:101179417-101193201	Fluc	MyD88	48.5903	63.0053	0.374804	0.0435	0.38223	no	Fluc vs MyD88
B3GNT4	12:122688227-122692084	Fluc	MyD88	0.295853	0.677749	1.19587	0.04355	0.382488	no	Fluc vs MyD88
DTD2	14:31915241-31926680	Fluc	MyD88	5.02786	6.73713	0.42219	0.04355	0.382488	no	Fluc vs MyD88
GAA	17:78075354-78093679	Fluc	MyD88	12.8826	9.79826	-0.394827	0.04355	0.382488	no	Fluc vs MyD88
CLEC3B	3:45067758-45077563	Fluc	MyD88	0.671139	0.222848	-1.59055	0.0436	0.38277	no	Fluc vs MyD88
FAM3C	7:120988904-121036422	Fluc	MyD88	26.851	34.5884	0.365313	0.0436	0.38277	no	Fluc vs MyD88
N6AMT1	21:30244512-30257695	Fluc	MyD88	7.80117	10.7402	0.461262	0.04365	0.382973	no	Fluc vs MyD88
PKDCC	2:42275160-42285668	Fluc	MyD88	3.86886	2.76833	-0.48289	0.0437	0.38322	no	Fluc vs MyD88
PGM2L1	11:74041360-74109502	Fluc	MyD88	2.26945	3.00556	0.405292	0.0438	0.38377	no	Fluc vs MyD88
DLX2	2:172964165-172967478	Fluc	MyD88	1.41824	0.879563	-0.68924	0.04385	0.384043	no	Fluc vs MyD88
CD46	1:207925382-207968861	Fluc	MyD88	13.8553	18.0284	0.37983	0.04395	0.384486	no	Fluc vs MyD88
CELSR1	22:46756730-46933067	Fluc	MyD88	3.82477	2.9178	-0.39049	0.04405	0.384908	no	Fluc vs MyD88
DKC1	X:153991030-154005964	Fluc	MyD88	85.9241	109.814	0.353929	0.0441	0.385156	no	Fluc vs MyD88
SLC16A5	17:73084054-73102252	Fluc	MyD88	3.65408	2.51221	-0.540552	0.0442	0.385644	no	Fluc vs MyD88
FAM86C2P	11:67559237-67572807	Fluc	MyD88	1.38355	2.07691	0.586063	0.04435	0.386322	no	Fluc vs MyD88
LPIN3	20:39969559-39995498	Fluc	MyD88	5.43001	3.94998	-0.459109	0.04435	0.386322	no	Fluc vs MyD88
SLC4A11	20:3208062-3219887	Fluc	MyD88	1.51993	1.03584	-0.553203	0.04435	0.386322	no	Fluc vs MyD88
C14orf93	14:23456109-23479360	Fluc	MyD88	2.5958	1.834	-0.501185	0.04445	0.386787	no	Fluc vs MyD88
2015-03-03	5:126203405-126366440	Fluc	MyD88	5.86753	7.6998	0.392068	0.04445	0.386787	no	Fluc vs MyD88
ZDHHC11	5:795719-851101	Fluc	MyD88	0.564727	0.327253	-0.787148	0.04445	0.386787	no	Fluc vs MyD88
CRIPAK	4:1385339-1389782	Fluc	MyD88	1.38672	0.943583	-0.555453	0.0445	0.387034	no	Fluc vs MyD88
CEP85L	6:118781934-119031238	Fluc	MyD88	3.40394	2.33599	-0.543168	0.04455	0.387323	no	Fluc vs MyD88
CELSR2	1:109792640-109818378	Fluc	MyD88	2.69269	2.03814	-0.401795	0.04465	0.387814	no	Fluc vs MyD88
PYCARD	16:31212806-31214767	Fluc	MyD88	5.25485	2.56702	-1.03355	0.04475	0.388383	no	Fluc vs MyD88
SGSH	17:78143790-78194199	Fluc	MyD88	8.79509	6.61615	-0.410708	0.04475	0.388383	no	Fluc vs MyD88
LRRC32	11:76368567-76381791	Fluc	MyD88	0.550252	0.339778	-0.6955	0.0448	0.388604	no	Fluc vs MyD88
GOLGA8O	15:32737306-32747835	Fluc	MyD88	1.08076	0.698612	-0.629479	0.045	0.389545	no	Fluc vs MyD88
C6orf62	6:24667262-24719403	Fluc	MyD88	48.3193	63.2507	0.388482	0.0452	0.390509	no	Fluc vs MyD88
ELF1	13:41506054-41593508	Fluc	MyD88	3.47881	4.64051	0.415689	0.0453	0.391002	no	Fluc vs MyD88
TK1	17:76170159-76183285	Fluc	MyD88	160.077	124.975	-0.357127	0.0453	0.391002	no	Fluc vs MyD88
TENM3	4:183245136-183724177	Fluc	MyD88	14.9312	11.6475	-0.35831	0.04545	0.391744	no	Fluc vs MyD88
FAM115A	7:143548460-143599278	Fluc	MyD88	16.2766	12.6493	-0.363741	0.0456	0.392396	no	Fluc vs MyD88
HMG20B	19:3572942-3579081	Fluc	MyD88	34.1366	26.1416	-0.384975	0.0456	0.392396	no	Fluc vs MyD88
ABRACL	6:139349818-139364439	Fluc	MyD88	16.7984	22.4809	0.420374	0.04575	0.393141	no	Fluc vs MyD88
HIP1R	12:123320038-123347507	Fluc	MyD88	7.84522	5.9683	-0.394494	0.04575	0.393141	no	Fluc vs MyD88
BAIAP2-AS1	17:79002932-79008519	Fluc	MyD88	6.04423	4.57911	-0.400493	0.0459	0.393821	no	Fluc vs MyD88
FAHD2CP	2:96676298-96700727	Fluc	MyD88	1.39496	0.738571	-0.917415	0.0459	0.393821	no	Fluc vs MyD88
BCCIP	10:127512103-127569884	Fluc	MyD88	121.694	159.33	0.388767	0.0461	0.394872	no	Fluc vs MyD88
LINC00565	13:114629486-114631964	Fluc	MyD88	1.45837	2.10891	0.532147	0.0461	0.394872	no	Fluc vs MyD88
CADM3	1:159141376-159172932	Fluc	MyD88	3.47687	2.37624	-0.549112	0.0462	0.39538	no	Fluc vs MyD88
MT1E	16:56659584-56661024	Fluc	MyD88	8.14091	12.2619	0.590915	0.04625	0.395622	no	Fluc vs MyD88
PDIA3P	1:146649429-146651528	Fluc	MyD88	1.68874	2.40677	0.51115	0.0463	0.395887	no	Fluc vs MyD88
SLC37A3	7:140033551-140098311	Fluc	MyD88	8.17038	10.6996	0.389081	0.0463	0.395887	no	Fluc vs MyD88
DNAJC6	1:65730376-65881552	Fluc	MyD88	2.23722	1.66722	-0.424257	0.0465	0.396859	no	Fluc vs MyD88
KRT80	12:52562779-52585784	Fluc	MyD88	3.65545	2.71157	-0.430919	0.0466	0.397321	no	Fluc vs MyD88
HSPA14	10:14880260-14913740	Fluc	MyD88	13.4957	17.7231	0.393129	0.04665	0.397608	no	Fluc vs MyD88
TMEM70	8:74888376-74895018	Fluc	MyD88	11.2971	14.8126	0.390877	0.04665	0.397608	no	Fluc vs MyD88
CRIPT	2:46844324-46852881	Fluc	MyD88	6.39736	8.61316	0.429067	0.0467	0.397876	no	Fluc vs MyD88
SH3RF3	2:110259066-110262207	Fluc	MyD88	2.18423	1.46989	-0.571413	0.0467	0.397876	no	Fluc vs MyD88
TRIQK	8:93895757-93978372	Fluc	MyD88	2.35738	3.20013	0.440947	0.0469	0.398881	no	Fluc vs MyD88
APLF	2:68694690-68807294	Fluc	MyD88	0.563756	0.835427	0.567442	0.04695	0.399107	no	Fluc vs MyD88
EXOC6B	2:72406443-73053177	Fluc	MyD88	7.98982	6.06326	-0.398068	0.04705	0.399632	no	Fluc vs MyD88
SUSD3	9:95820988-95847415	Fluc	MyD88	0.642112	0.259771	-1.30558	0.04705	0.399632	no	Fluc vs MyD88
ADCY6	12:49159974-49182820	Fluc	MyD88	11.4412	8.84567	-0.371194	0.0471	0.399894	no	Fluc vs MyD88
ZC3H15	2:187350884-187374088	Fluc	MyD88	55.6672	71.6142	0.363418	0.04715	0.400112	no	Fluc vs MyD88
CACNA2D2	3:50400229-50540892	Fluc	MyD88	0.665761	0.448302	-0.570533	0.0473	0.400812	no	Fluc vs MyD88
MAD2L1	4:120980576-120988013	Fluc	MyD88	73.5792	94.5165	0.361268	0.0473	0.400812	no	Fluc vs MyD88
MOSPD3	7:100209724-100213000	Fluc	MyD88	9.47479	6.77786	-0.483264	0.04755	0.402047	no	Fluc vs MyD88
PARL	3:183547172-183602693	Fluc	MyD88	33.2066	42.9576	0.371443	0.0476	0.402271	no	Fluc vs MyD88
STPG1	1:24645811-24741587	Fluc	MyD88	4.12414	2.97195	-0.472684	0.0478	0.403268	no	Fluc vs MyD88
ITFG3	16:284800-316119	Fluc	MyD88	26.7106	20.6294	-0.372713	0.04785	0.403463	no	Fluc vs MyD88
MLLT6	17:36861872-36886056	Fluc	MyD88	12.9733	10.0691	-0.365614	0.0479	0.403661	no	Fluc vs MyD88
C8orf46	8:67405490-67430759	Fluc	MyD88	1.58467	1.11456	-0.507698	0.048	0.404142	no	Fluc vs MyD88
DLGAP1-AS1	18:3496029-4455266	Fluc	MyD88	0.903413	1.63217	0.853337	0.048	0.404142	no	Fluc vs MyD88
CISD2	4:103790134-103940896	Fluc	MyD88	5.13074	6.70645	0.386384	0.0481	0.404614	no	Fluc vs MyD88
KLHL22	22:20795805-20850170	Fluc	MyD88	8.66997	6.54136	-0.406437	0.0481	0.404614	no	Fluc vs MyD88
SAR1B	5:133936838-133968533	Fluc	MyD88	10.4737	13.4229	0.357921	0.04825	0.405218	no	Fluc vs MyD88
SNRPF	12:96252708-96260238	Fluc	MyD88	175.672	225.272	0.358782	0.0483	0.405471	no	Fluc vs MyD88
FBXO17	19:39432041-39466380	Fluc	MyD88	7.63692	5.70959	-0.419604	0.04835	0.405707	no	Fluc vs MyD88
SOX12	20:306238-310868	Fluc	MyD88	15.2046	11.7553	-0.371198	0.04835	0.405707	no	Fluc vs MyD88
WDR43	2:29117532-29171080	Fluc	MyD88	36.4646	46.4303	0.34857	0.04835	0.405707	no	Fluc vs MyD88
RIMS3	1:41086351-41131324	Fluc	MyD88	0.683716	0.473573	-0.529811	0.04845	0.406124	no	Fluc vs MyD88
SLC41A2	12:105197274-105322472	Fluc	MyD88	0.954852	1.3793	0.530589	0.04845	0.406124	no	Fluc vs MyD88
STXBP2	19:7701990-7712759	Fluc	MyD88	1.47017	0.958764	-0.616737	0.04845	0.406124	no	Fluc vs MyD88
CARHSP1	16:8946801-8962863	Fluc	MyD88	28.1308	21.8443	-0.364895	0.0485	0.406364	no	Fluc vs MyD88
SLC29A4	7:5322560-5343704	Fluc	MyD88	3.52815	2.54748	-0.469844	0.04855	0.4066	no	Fluc vs MyD88
ACTN4	19:39138266-39235114	Fluc	MyD88	115.689	90.4004	-0.355845	0.0486	0.406804	no	Fluc vs MyD88
C19orf57	19:13993167-14016909	Fluc	MyD88	1.19813	0.790289	-0.600333	0.0486	0.406804	no	Fluc vs MyD88
ARHGEF18	19:7459998-7537371	Fluc	MyD88	9.59712	7.40853	-0.373415	0.0487	0.407214	no	Fluc vs MyD88
PRKAA2	1:57110989-57181008	Fluc	MyD88	0.582775	0.404712	-0.526044	0.0487	0.407214	no	Fluc vs MyD88
CISH	3:50643884-50649262	Fluc	MyD88	0.765427	0.444624	-0.783678	0.04875	0.407386	no	Fluc vs MyD88
RGAG4	X:71130937-71363424	Fluc	MyD88	1.77641	1.26003	-0.495505	0.0488	0.407557	no	Fluc vs MyD88
PPDPF	20:62152132-62153524	Fluc	MyD88	249.859	194.158	-0.363884	0.04885	0.407775	no	Fluc vs MyD88
CAMKK1	17:3763608-3796337	Fluc	MyD88	9.31537	7.1023	-0.391327	0.0489	0.408029	no	Fluc vs MyD88
CDC42EP5	19:54976209-54984422	Fluc	MyD88	1.80585	0.943069	-0.937241	0.04895	0.408267	no	Fluc vs MyD88
GOLGA6L3	15:85783640-85790401	Fluc	MyD88	0.522879	0.279957	-0.901275	0.04895	0.408267	no	Fluc vs MyD88
PCDH9	13:66876965-67804468	Fluc	MyD88	1.47557	1.0761	-0.455462	0.049	0.408449	no	Fluc vs MyD88
CNBP	3:128886657-128902810	Fluc	MyD88	117.111	149.396	0.35127	0.04915	0.409058	no	Fluc vs MyD88
IRF2	4:185308875-185395726	Fluc	MyD88	5.66279	7.52748	0.410655	0.04915	0.409058	no	Fluc vs MyD88
FSIP1	15:39892231-40075039	Fluc	MyD88	0.266169	0.451766	0.763235	0.0492	0.409291	no	Fluc vs MyD88
DNAJB9	7:108210188-108215294	Fluc	MyD88	4.69843	6.29542	0.422125	0.04925	0.409512	no	Fluc vs MyD88
HSD17B8	6:33172413-33174608	Fluc	MyD88	0.335662	0.739567	1.13967	0.04925	0.409512	no	Fluc vs MyD88
EIF2S1	14:67827033-67853233	Fluc	MyD88	57.0844	72.897	0.352764	0.0494	0.410185	no	Fluc vs MyD88
THAP8	19:36525886-36545664	Fluc	MyD88	2.15727	1.45299	-0.570177	0.04945	0.410429	no	Fluc vs MyD88
ERGIC2	12:29493578-29534143	Fluc	MyD88	34.7068	44.5905	0.361516	0.04955	0.410868	no	Fluc vs MyD88
PHF19	9:123617930-123639606	Fluc	MyD88	43.6273	31.0939	-0.488597	0.0496	0.411096	no	Fluc vs MyD88
FNBP1	9:132649465-132805473	Fluc	MyD88	13.669	10.6083	-0.365714	0.04965	0.411366	no	Fluc vs MyD88
NFKBID	19:36379142-36391552	Fluc	MyD88	1.06723	1.68336	0.657469	0.04965	0.411366	no	Fluc vs MyD88
ANXA11	10:81914879-81965328	Fluc	MyD88	22.6566	17.5607	-0.367587	0.0497	0.411562	no	Fluc vs MyD88
KPNA4	3:160212782-160283376	Fluc	MyD88	20.1095	25.6163	0.349189	0.0497	0.411562	no	Fluc vs MyD88
NRXN2	11:64373645-64490660	Fluc	MyD88	0.744078	0.486686	-0.612464	0.04975	0.411804	no	Fluc vs MyD88
TUBB2B	6:3224494-3227968	Fluc	MyD88	7.04199	5.26915	-0.418412	0.04985	0.412225	no	Fluc vs MyD88
EML2	19:46112657-46148775	Fluc	MyD88	5.61891	4.12404	-0.446231	0.0499	0.412483	no	Fluc vs MyD88
LPAR3	1:85279085-85358896	Fluc	MyD88	1.78331	1.15129	-0.631305	0.0499	0.412483	no	Fluc vs MyD88
DNAJB11	3:186288466-186303589	Fluc	MyD88	95.7495	122.067	0.350334	0.04995	0.412689	no	Fluc vs MyD88
TRMT5	14:61438158-61447782	Fluc	MyD88	3.44009	4.51111	0.391035	0.04995	0.412689	no	Fluc vs MyD88

## Sheet: Tab 2
© 2000-2015 QIAGEN. All rights reserved.
Upstream Regulator	Exp Log Ratio	Molecule Type	Predicted Activation State	Activation z-score	p-value of overlap	Target molecules in dataset	Mechanistic Network
TNF		cytokine	Activated	5.685	4.49E-30	ADORA2A,BCL2A1,C3,CCL11,CCL2,CD83,CFB,COL16A1,CXCL1,CXCL2,CXCL3,CXCL5,CXCL8,DPP4,F2RL1,HDAC9,ICAM1,ICOSLG/LOC102723996,IER3,IGF2,IGFBP2,IL1B,IL32,IL6,INHBA,LAMB3,MMP1,MMP3,MMP9,NFKB2,NFKBIA,PLAU,PRDM1,PTX3,RELB,RFTN1,SERPINB2,SOD2,STAC,TNFAIP3,VEGFC	72 (17)
IL1B	6.159	cytokine	Activated	5.035	6.91E-25	AMPD3,BCL2A1,C3,CCL11,CCL2,CXCL1,CXCL2,CXCL3,CXCL5,CXCL8,DPP4,ICAM1,IL1B,IL32,IL6,LCP1,MMP1,MMP3,MMP9,MT2A,NFKBIA,NFKBIZ,PTX3,SERPINB2,SOD2,TNFAIP6,VEGFC	55 (13)
NFkB (complex)		complex	Activated	4.546	5.60E-30	BCL2A1,C3,CCL2,CD83,CXCL1,CXCL2,CXCL3,CXCL8,GDF15,HAS2,ICAM1,IER3,IL1B,IL6,JAG1,KIT,MMP1,MMP3,MMP9,NAMPT,NFKB2,NFKBIA,NFKBIZ,PLAU,RELB,RFTN1,SERPINB2,SOD2,TFPI2,TNFAIP3,TWIST1,VEGFC	59 (13)
IL1A		cytokine	Activated	4.456	7.11E-26	ADORA2A,CCL2,CXCL1,CXCL2,CXCL3,CXCL5,CXCL8,ICAM1,IL11,IL1B,IL32,IL6,MMP1,MT2A,NFKBIA,NFKBIZ,PLAU,PTX3,SOD2,TNFAIP3,ZC3H12A	61 (17)
TLR7		transmembrane receptor	Activated	3.927	1.33E-17	CCL2,CD83,CXCL1,CXCL2,CXCL3,CXCL8,ICAM1,IER3,IL1B,IL6,ISG20,MYD88,NFKBIA,PLAU,PTX3,ZC3H12A	57 (12)
FOXL2		transcription regulator	Activated	3.441	2.04E-14	BCL2A1,CXCL2,CXCL3,GPRC5B,ICAM1,IER3,IL11,LIF,SERPINB2,SMAD6,SOD2,TNFAIP3
IL17A		cytokine	Activated	3.295	3.18E-18	BCL2A1,CCL11,CCL2,CD83,CXCL1,CXCL2,CXCL3,CXCL5,CXCL8,ICAM1,IL1B,IL6,MMP3,MMP9	71 (18)
JUN		transcription regulator	Activated	3.159	3.18E-14	CCL2,CXCL1,CXCL5,CXCL8,DIO2,ICAM1,IL1B,IL6,MMP1,MMP9,NFKBIA,NFKBIZ,PTX3,SOD2,ZFP36	52 (10)
ERK1/2		group	Activated	3.077	5.84E-08	CCL2,CXCL3,CXCL8,ICAM1,ID1,IL11,IL1B,IL6,MMP1,MMP3	51 (15)
Cg		complex	Activated	3.064	2.90E-16	CCL2,CXCL8,DUSP6,ESM1,F2RL1,HAS2,IGFBP3,IL11,MMP1,PLAU,PTX3,STC1,STEAP1,TFPI2,TMEM158,VEGFC	45 (7)
EZH2		transcription regulator	Activated	3.022	5.01E-11	C15orf48,C3,CD82,CXCL1,CXCL2,CXCL8,GDF15,ICOSLG/LOC102723996,IL11,IL6,NFKBIA,PPP2R2B	34 (5)
CCL5	0.749	cytokine	Activated	2.985	7.97E-11	CCL2,CXCL8,DUSP6,IL1B,IL6,MMP9,NAMPT,PPIF,SERPINB2	18 (3)
CD40LG		cytokine	Activated	2.959	3.85E-09	CCL2,CD83,CXCL8,ICAM1,IL1B,IL6,NAMPT,NFKB2,NFKBIA,TNFAIP3	55 (15)
IL18		cytokine	Activated	2.935	1.54E-09	CCL2,CXCL8,ICAM1,IL1B,IL6,MMP1,MMP3,MMP9,NFKBIZ	59 (19)
TLR4		transmembrane receptor	Activated	2.888	7.69E-10	C3,CCL2,CXCL8,ICAM1,IL1B,IL6,MMP1,MMP9,NFKB2	59 (18)
P38 MAPK		group	Activated	2.827	2.97E-10	CCL2,CD82,CD83,CXCL8,DIO2,ICAM1,IER3,IL1B,IL6,INHBA,MMP1,MMP3,MMP9	66 (17)
CSF2		cytokine	Activated	2.813	6.30E-07	CCL2,CXCL8,DUSP6,ICAM1,IER3,IL1B,IL6,PPIF	51 (13)
RELA		transcription regulator	Activated	2.807	2.65E-21	CCL2,CXCL1,CXCL2,CXCL3,CXCL5,CXCL8,FMN2,HAS2,ICAM1,IL1B,IL6,KIT,MMP1,MMP9,NAMPT,NFKB2,NFKBIA,PTX3,RELB,SOD2,TFPI2,TWIST1	63 (12)
TGM2		enzyme	Activated	2.789	4.70E-04	BCL2A1,C3,CCL2,CXCL8,IL1B,MMP9,MT2A,SERPINB2	48 (7)
PRKCD		kinase	Activated	2.766	8.34E-10	CXCL8,ICAM1,IL1B,IL6,MMP9,NFKB2,NFKBIA,RELB	53 (15)
PTGS2	1.610	enzyme	Activated	2.631	2.87E-07	CCL2,CXCL5,CXCL8,ICAM1,IL1B,IL6,MMP9	49 (9)
PGR		ligand-dependent nuclear receptor	Activated	2.613	2.45E-05	ICAM1,ID1,IER3,KRT18,NFKBIA,PLAU,PPIF,PRRX1
FOXO1	1.598	transcription regulator	Activated	2.596	1.42E-07	CXCL8,FBXO32,IER3,IL6,JAG1,MMP1,MMP3,MMP9	34 (3)
TP63		transcription regulator	Activated	2.596	6.66E-07	CD82,CXCL8,DUSP6,IER3,IGFBP3,IL1B,IL6,JAG1,PLAU,SERPINB2,TRIM6
FOXO3		transcription regulator	Activated	2.533	1.33E-08	CXCL8,FBXO32,IER3,IL6,JAG1,MMP9,NFKBIA,SOD2	53 (11)
CD40		transmembrane receptor	Activated	2.480	1.22E-07	BCL2A1,CCL2,CD83,CXCL8,ICAM1,IL1B,IL6,NFKB2,PRDM1	68 (19)
IL1		group	Activated	2.433	7.83E-09	CCL2,CXCL8,IL6,MMP1,MMP3,MMP9	59 (17)
lymphotoxin-alpha1-beta2		complex	Activated	2.433	2.05E-10	CCL2,ICAM1,IL1B,IL6,MMP1,MMP3
TNFSF12		cytokine	Activated	2.418	3.79E-11	CCL2,CXCL8,ICAM1,IL6,MMP1,MMP3	46 (13)
NAMPT	1.064	cytokine	Activated	2.415	7.83E-09	CXCL8,IL6,MMP1,MMP3,MMP9,NAMPT	48 (10)
F2		peptidase	Activated	2.412	3.43E-09	CXCL8,ICAM1,IL6,MMP1,MMP9,TFPI2	57 (15)
TLR2		transmembrane receptor	Activated	2.409	1.40E-05	CCL2,CXCL8,ICAM1,IL1B,IL6,MMP9	54 (18)
TLR3		transmembrane receptor	Activated	2.372	3.42E-09	C3,CFB,CXCL8,IFI44,IL1B,IL6,ISG20,MYD88,NFE2L3,PTX3
TREM1		transmembrane receptor	Activated	2.360	2.07E-13	CD83,CFB,CXCL1,CXCL2,CXCL3,CXCL5,CXCL8,IL1B,IL6,INHBA,LIF,MMP1,RHOBTB3,SCG5,SERPINB2,TFPI2,TMEM158	66 (14)
IFNG		cytokine	Activated	2.274	4.66E-14	ADORA2A,BCL2A1,CCL2,CXCL1,CXCL2,CXCL8,DPP4,HDAC9,HSPA1A/HSPA1B,ICAM1,ICOSLG/LOC102723996,IFI44,IL1B,IL32,IL6,ISG20,MMP1,MMP9,MYD88,NFE2L3,NFKBIA,SOD2	70 (16)
Jnk		group	Activated	2.254	3.35E-11	CCL2,CD83,CXCL8,GDF15,ICAM1,IL1B,IL6,MMP1,MMP3,MMP9,ZFP36	49 (10)
ERBB2		kinase	Activated	2.247	2.57E-05	CXCL8,ID1,IL6,MMP1,PLAU,RHOD,SCG5,VEGFC,WT1	46 (11)
Immunoglobulin		complex	Activated	2.236	1.20E-05	CCL2,CXCL2,IL1B,INHBA,NFKBIA
CEBPB	0.511	transcription regulator	Activated	2.236	3.95E-06	C3,CXCL8,IL1B,IL6,KRT18,MMP1,MMP3	34 (3)
SELPLG		other	Activated	2.236	5.31E-06	BCL2A1,CCL2,CXCL2,CXCL8,IL1B
STAT3	-0.369	transcription regulator	Activated	2.216	3.07E-06	CCL2,CD83,CXCL8,HAS2,IL6,JAG1,MMP9,NAMPT,TWIST1	37 (7)
TNFRSF1A		transmembrane receptor	Activated	2.214	1.49E-07	CCL2,CXCL1,CXCL8,IL1B,SOD2	59 (18)
FAT1		other	Activated	2.213	6.51E-09	IL1B,IL6,MMP3,PLAU,VEGFC
PF4		cytokine	Activated	2.213	4.00E-08	CCL2,CXCL3,CXCL8,IL1B,IL6	56 (16)
CDK9		kinase	Activated	2.207	5.59E-07	CXCL2,CXCL8,IL6,NFKBIA,TNFAIP3	21 (3)
MYD88	6.220	other	Activated	2.202	7.40E-07	CCL2,CXCL1,CXCL8,IL1B,IL6	61 (13)
IRF3		transcription regulator	Activated	2.200	7.49E-06	CCL2,CXCL8,IL6,MMP3,MMP9	55 (8)
RAF1		kinase	Activated	2.191	9.64E-07	IL1B,IL6,MMP1,MMP3,MMP9	48 (15)
TLR9		transmembrane receptor	Activated	2.190	6.68E-05	CD83,CXCL8,IL6,ISG20,PRDM1	28 (4)
MAP2K1		kinase	Activated	2.159	1.20E-05	BCL2A1,DUSP6,GPRC5B,MMP1,MMP9	10 (4)
Fcer1		complex	Activated	2.135	1.57E-06	CCL2,CXCL8,IL1B,IL6,INHBA	54 (20)
PDGF BB		complex	Activated	2.111	3.29E-12	CCL2,CXCL8,DBNDD1,DUSP6,IER3,IL1B,IL6,LIF,NAMPT,PLAU,TNFAIP3,ZFP36	49 (11)
IL4		cytokine	Activated	2.078	1.06E-09	CCL11,CCL2,CD83,CXCL8,ICAM1,IL1B,IL6,KIT,MMP1,MMP9,PRDM1	63 (18)
HMGB1		transcription regulator	Activated	2.077	1.24E-06	CCL2,CD83,CXCL8,ICAM1,IL6	59 (19)
IL5		cytokine	Activated	2.000	8.74E-04	CCL2,DUSP6,IER3,PPIF
RIPK1		kinase	Activated	2.000	2.09E-07	CCL2,CXCL1,CXCL8,IL6	49 (10)
UXT		other	Activated	2.000	1.80E-04	CXCL8,KRT18,NFKBIA,TNFAIP3
WNT5A	0.885	cytokine		1.994	7.71E-06	CCL2,CXCL1,CXCL8,IL6
BIRC3	1.922	enzyme		1.992	9.03E-08	CCL2,CXCL1,CXCL8,IL6	47 (9)
IL32	2.517	cytokine		1.988	2.64E-05	CXCL1,CXCL8,IL1B,IL6	47 (10)
TNFSF14		cytokine		1.987	7.42E-07	F2RL1,ICAM1,IL6,MMP9	37 (5)
MIF		cytokine		1.986	1.92E-06	CXCL8,IL1B,MMP1,MMP3	47 (13)
F7		peptidase		1.985	2.27E-09	CXCL2,CXCL8,IL1B,JAG1,LIF,SERPINB2,ZFP36
TSLP		cytokine		1.982	5.70E-06	CCL11,CD83,CXCL8,IL6	55 (14)
Cdk		group		1.980	9.03E-08	CCL2,CXCL2,CXCL8,IL6
BIRC2		enzyme		1.980	2.86E-06	CCL2,CXCL1,CXCL8,IL6	52 (13)
IL21		cytokine		1.979	2.14E-03	IL6,MMP9,MYD88,PRDM1
CXCL12	-0.918	cytokine		1.979	9.45E-04	CCL2,CXCL8,IL6,MMP9	47 (14)
S100A8		other		1.973	5.70E-06	CCL2,CXCL8,IL1B,IL6	50 (18)
TLR8		transmembrane receptor		1.968	1.69E-05	CD83,CXCL8,IL1B,IL6	49 (16)
S100A9		other		1.966	2.09E-07	CXCL8,IL1B,IL6,MMP1	29 (5)
Mek		group		1.966	7.34E-03	CXCL8,DUSP6,IL6,VEGFC	18 (3)
TLR1		transmembrane receptor		1.960	5.70E-06	CXCL8,IL1B,IL6,TNFAIP3	59 (17)
BSG		transporter		1.949	1.92E-06	CXCL8,MMP1,MMP3,MMP9	35 (9)
EGF		growth factor		1.941	1.66E-04	CGA,CXCL8,DUSP6,MMP9,TFPI2	14 (4)
IFNL1		cytokine		1.940	2.02E-03	CXCL8,IFI44,IL6,ISG20
NFKB1	0.998	transcription regulator		1.910	3.35E-11	CD82,CXCL2,CXCL8,HAS2,IL1B,IL6,MMP9,NFKBIA,PLAU,PTX3,RELB	48 (9)
ITGB1		transmembrane receptor		1.838	1.06E-04	CCL2,CXCL8,MMP9,PLAU	53 (16)
FSH		complex		1.819	1.35E-07	ACTG2,GPRC5B,IGFBP3,IL6,ISG20,KRT18,MMP9,MT1X,MT2A,SMAD6,TFPI2,TNFAIP3,VEGFC,WT1
IKBKB		kinase		1.818	7.83E-09	CCL2,CXCL8,ICAM1,IL1B,IL6,TWIST1	48 (10)
PPRC1		transcription regulator		1.715	2.81E-06	CXCL8,ESM1,GDF15,LAMB3,NAMPT,NFKBIZ
FOSL1		transcription regulator		1.702	1.61E-08	CXCL8,IL6,MMP1,MMP3,MMP9,SERPINB2	8 (2)
Notch		group		1.698	1.39E-04	ID1,ID2,JAG1,SMAD6
IL6	4.511	cytokine		1.671	5.30E-04	C3,CCL2,CD82,KIT,NFKBIA,PLAU	38 (6)
KLF6		transcription regulator		1.611	3.06E-08	CCL2,CXCL2,CXCL8,MMP9,NFKBIA,TFPI2	49 (11)
Lh		complex		1.564	5.70E-04	ACTG2,GPRC5B,IL6,KRT18,MMP9,TFPI2,TNFAIP3,VEGFC
SPP1		cytokine		1.501	1.95E-04	HAS2,KRT18,MMP9,PLAU,TM7SF2
EGFR		kinase		1.477	6.47E-05	CXCL8,ICAM1,IGFBP3,JAG1,MMP1,PLAU	58 (18)
CAMP		other		1.448	2.29E-07	CCL2,CD83,CXCL1,CXCL8,IL1B,IL6	48 (17)
IL2		cytokine		1.446	3.77E-04	EPHA4,IL1B,PPP2R2B,PRDM1,RFTN1
ERK		group		1.426	3.42E-09	CCL2,CXCL8,DIO2,GDF15,ICAM1,LIF,MMP1,PRDM1,SERPINB2,ZFP36	35 (7)
CEBPA		transcription regulator		1.400	8.19E-05	BCL2A1,C3,CXCL8,ID2,MT2A,PTX3,SOD2
PAF1		other		1.342	5.42E-05	IFI44,ISG20,NFKBIZ,SOD2,ZFP36
CCL2	4.198	cytokine		1.303	5.59E-07	CXCL8,ICAM1,IL6,INHBA,MMP1	31 (7)
EIF2AK2		kinase		1.300	1.03E-05	CXCL8,IL6,ISG20,NFKBIA,SOD2,TNFAIP3	53 (11)
NUPR1		transcription regulator		1.265	1.39E-02	CXCL3,CXCL5,CXCL8,GDF15,LIF,MT1X,MYD88,RELB,SGK223,TMEM158
TERT		enzyme		1.265	6.83E-12	CXCL8,IL1B,IL6,MMP1,MMP3,MMP9,NFKBIA,SERPINB2,SOD2	54 (16)
TGFB1	-0.396	growth factor		1.230	2.32E-10	CCL11,CCL2,CXCL8,HAS2,ID1,IGFBP3,IL11,IL6,JAG1,MMP1,MMP3,MMP9,NFKBIA,PLAU,RHOD,SCG5,TWIST1,ZFP36	55 (19)
FOS	-0.723	transcription regulator		1.195	4.55E-09	CCL2,CXCL8,DIO2,ICAM1,IL11,MMP1,MMP3,MMP9,SERPINB2	49 (8)
Pkc(s)		group		1.124	1.18E-04	CCL2,CXCL8,IGF2,IL6,MMP9	49 (15)
Ap1		complex		1.119	5.04E-07	CXCL8,IGFBP3,IL6,MMP1,MMP9,MT2A
PI3K (complex)		complex		1.109	3.06E-04	CXCL8,IGFBP2,IL1B,IL6,PRDM1	50 (15)
SMARCA4		transcription regulator		1.091	1.05E-14	ABLIM3,CALB2,CCL2,DUSP6,EPHA4,GCHFR,ICAM1,IER3,IL11,IL1B,INHBA,ITGA7,KRT18,LPXN,LUM,MGP,MMP1,NFKBIZ,NRP2,PTX3,SCG5,SEL1L3,SEMA3B,SERPINB2,SOD3,STXBP6
IKBKE	0.703	kinase		1.067	1.33E-05	CXCL8,IL6,MMP9,NFKBIA	48 (12)
EP300		transcription regulator		1.067	2.06E-05	CCL2,CXCL8,ID2,MMP1,SMAD6,SOD2	47 (12)
SYVN1		transporter		1.000	3.06E-02	DIO2,IFI44,IRAK2,NFKB2
IL27		cytokine		0.991	1.41E-04	CCL2,CXCL8,ICAM1,IL1B,IL6	63 (13)
ETS1	0.511	transcription regulator		0.988	2.93E-05	HSPA1A/HSPA1B,MMP1,MMP3,MMP9,PLAU,RHOBTB3
HGF		growth factor		0.834	1.69E-03	CCL2,CXCL8,PLAU,VEGFC,WT1	9 (3)
PDLIM2		other		0.816	1.45E-04	CXCL8,F2RL1,IFI44,IGFBP3,KIT,MME
FAS		transmembrane receptor		0.782	2.07E-21	BCL2A1,CCL2,CXCL1,CXCL8,ICAM1,IER3,IL6,MME,MMP1,MMP9,NFKBIA,PLAU,SOD2,TNFAIP3,ZFP36	60 (18)
estrogen receptor		group		0.299	1.45E-13	C3,CALB2,COL9A2,CXCL1,CXCL8,HSPA1A/HSPA1B,ICAM1,IL6,JAG1,KRT18,MAN1A1,MMP1,MMP9,NCAM2,PCDH7,PLAU,SMAD6,VEGFC	46 (4)
TP53		transcription regulator		0.125	6.53E-06	CXCL1,CXCL8,GDF15,HSPA1A/HSPA1B,ID1,ID2,IGFBP3,IL6,LIF,MMP3,MMP9,NFKB2,NFKBIA,SMAD6,SOD2,TRIM6,TWIST1	53 (13)
PI3K (family)		group		0.112	2.28E-04	CCL2,CXCL8,FBXO32,IL6,MMP9	47 (12)
CD44	0.452	enzyme		0.088	5.74E-04	IL6,MMP9,PLAU,STEAP1	26 (4)
FGF8		growth factor		0.000	8.07E-04	CCL11,CCL2,LAMB3,TM7SF2
NEDD9		other		0.000	2.30E-04	GDF15,KIT,MMP9,STC1
MAP3K7		kinase		0.000	1.03E-05	CFB,CXCL8,IL1B,IL6,MMP3	55 (16)
SRC		kinase		-0.077	1.61E-08	CXCL8,FMN2,ID1,IL6,PLAU,VEGFC	32 (7)
IgG		complex		-0.137	8.19E-05	CCL2,IL1B,IL6,KRT18,PPIF,TNFAIP3,ZFP36
IL25		cytokine		-0.247	4.15E-07	CCL2,CXCL8,IL1B,IL6	59 (16)
HIF1A		transcription regulator		-0.425	5.16E-03	CXCL8,IGFBP3,MMP9,SOD2,TMEM45A,VEGFC	46 (9)
KIAA1524		other		-0.447	1.80E-04	ACTG2,CFB,IER3,LUM,RHOD
Hdac		group		-0.461	6.02E-05	CXCL8,CYP24A1,FBXO32,IGFBP3,IL6	31 (6)
IGF1		growth factor		-0.537	1.66E-04	BCL2A1,CXCL8,IGF2,IGFBP3,PLAU	19 (5)
CDKN1A	-0.664	kinase		-0.640	6.68E-06	CCL2,JAG1,KRT18,MMP1,MMP3,MMP9	49 (11)
IL13		cytokine		-0.739	5.10E-06	C3,CCL11,CCL2,CXCL1,CXCL5,CXCL8,IL1B,JAG1,MT1X,RFTN1	46 (7)
Gsk3		group		-0.762	7.82E-05	CXCL8,GDF15,IL1B,TNFAIP3	47 (7)
KMT2D		transcription regulator		-0.762	5.64E-05	LAMB3,PCDH7,PPP2R2B,SMAD6
CBX5		transcription regulator		-0.816	4.16E-04	C15orf48,CXCL5,GCHFR,KIT,LAMB3,SCG5
PPARG		ligand-dependent nuclear receptor		-0.849	9.85E-05	CCL2,CXCL8,IGFBP3,IL1B,MMP9	36 (5)
CDKN2A		transcription regulator		-0.943	9.12E-05	CCL2,IL6,MMP1,MMP3	29 (5)
CBX7	-0.857	other		-1.000	5.70E-06	CXCL8,GDF15,PAPPA,PRDM1
HLX		transcription regulator		-1.000	4.73E-05	CXCL8,GDF15,PAPPA,PRDM1
TRAF3	0.431	other		-1.109	6.46E-08	IL1B,NFKB2,NFKBIA,RELB,TNFAIP3	47 (9)
MGEA5		enzyme		-1.134	3.83E-03	ABLIM3,CXCL8,EPHA4,IGF2,LPXN,LRIG1,PLAU
Nr1h		group		-1.154	1.69E-05	C3,CXCL1,CXCL8,IL6
IL12 (complex)		complex		-1.172	3.07E-05	CCL2,IL6,MMP9,MYD88,PLAU	50 (7)
CLDN7		other		-1.342	7.88E-04	C1S,CXCL8,MMP9,MT1X,MT2A
MAPK1		kinase		-1.342	1.59E-02	C1S,CFB,IFI44,ISG20,TMEM158
ESR1		ligand-dependent nuclear receptor		-1.496	9.34E-09	C3,CCL2,CXCL3,CXCL8,ICOSLG/LOC102723996,ID1,IER3,IFI44,IGFBP2,IL6,ISG20,MMP1,PTX3,SEMA3B,SMAD6,TNFAIP3,TNFAIP6	39 (8)
JAG2	-1.571	growth factor		-1.664	2.82E-07	C3,CXCL1,CXCL3,CXCL5,IL1B,IL6
COL18A1		other		-1.709	1.99E-06	CCL2,F2RL1,ICAM1,ID1,IL6,MMP1,PLAU	46 (7)
TP73		transcription regulator		-1.798	3.00E-04	CCL2,CXCL1,CXCL2,HSPA1A/HSPA1B,IGFBP3,TWIST1,VEGFC	44 (7)
mir-146		microrna		-1.980	1.92E-06	CCL2,CXCL8,IL1B,IL6
IL11	1.474	cytokine		-1.982	2.09E-07	CXCL8,IL1B,IL6,MMP1	22 (3)
TAB1		enzyme		-1.982	3.94E-05	CFB,CXCL8,IL1B,IL6	48 (12)
WT1	1.087	transcription regulator		-1.982	2.02E-03	CCL2,IL11,IL1B,MMP9,MT1X
STK40		kinase		-1.994	6.10E-09	CXCL1,CXCL5,CXCL8,IL1B
miR-31-5p (and other miRNAs w/seed GGCAAGA)		mature microrna		-1.998	3.03E-08	CXCL1,CXCL5,CXCL8,IL1B
PPP2R5C		other	Inhibited	-2.000	1.02E-05	BCL2A1,CXCL8,RELB,TNFAIP3	47 (7)
BMP7		growth factor	Inhibited	-2.186	9.80E-12	CCL2,CXCL8,ID1,ID2,IGF2,IGFBP3,IL1B,IL6	54 (11)
TNFRSF18		transmembrane receptor	Inhibited	-2.236	3.17E-10	CCL2,CXCL8,ICAM1,IL6,MMP9	47 (7)
S100A6	-0.640	transporter	Inhibited	-2.236	3.66E-06	CXCL2,CXCL8,INHBA,STC1,TNFAIP3
PDCD4		other	Inhibited	-2.236	2.91E-09	IL1B,IL6,MMP3,PLAU,VEGFC
IL10		cytokine	Inhibited	-2.317	4.33E-06	BCL2A1,CD83,CXCL8,ICAM1,IL1B,IL6,TWIST1	61 (17)
HMOX1		enzyme	Inhibited	-2.355	3.79E-11	CCL2,CXCL1,CXCL3,CXCL5,CXCL8,ID1,IL1B,IL6,MMP9	55 (12)
miR-155-5p (miRNAs w/seed UAAUGCU)		mature microrna	Inhibited	-2.411	1.48E-07	CXCL1,CXCL2,CXCL3,CXCL8,IL1B,IL6
IL1RN		cytokine	Inhibited	-2.425	3.19E-05	HDAC9,ICAM1,IFI44,IL32,ISG20,MMP1	50 (7)
NR3C1		ligand-dependent nuclear receptor	Inhibited	-2.597	3.95E-07	C1QTNF1,CCL2,CXCL8,HSPA6,ICAM1,IER3,IL11,IL1B,IL6,INHBA,MYD88,NAMPT,NFKB2,NFKBIA,TNFAIP3,TNFAIP6
LY6E		other	Inhibited	-2.621	1.27E-12	CD83,CXCL8,IL1B,IL6,IRAK2,NFKBIA,RELB
NEUROG1		transcription regulator	Inhibited	-3.317	4.88E-12	C1S,C3,CD82,CXCL1,HAS2,IL6,INHBA,LCP1,LRIG1,MMP9,PAPPA
DNA-methyltransferase		group			4.38E-02	MMP1
CD300LF		other			7.90E-05	CXCL8,MMP9
CHD7		enzyme			3.52E-02	JAG1
MEG3	-0.638	other			2.65E-02	GDF15
JINK1/2		group			4.38E-02	IL6
Fcgr2		group			4.38E-02	IL6
JAK		group			1.16E-03	CD83,IL6	26 (4)
Creb		group			1.06E-02	HAS2,IER3,MMP1
SYK/ZAP		group			4.68E-04	IL6,VEGFC
Rsk		group			8.91E-03	CXCL8
Hsp27		group			1.77E-02	CXCL8,IL6
TCR		complex			1.77E-06	BCL2A1,CXCL8,IFI44,ISG20,MYD88,NFE2L3,NFKB2,NFKBIA,RELB,TNFAIP3	50 (10)
STAT5a/b		group			3.29E-02	EPHA4,RFTN1
p70 S6k		group			8.91E-03	ICOSLG/LOC102723996
RNA polymerase II		complex			8.71E-09	CXCL2,CXCL8,GDF15,HAS2,HSPA1A/HSPA1B,ICAM1,ID1,IGFBP3,MMP9,NFKBIA,SOD2	44 (7)
Rb		group			5.77E-03	CCL2,MMP3
MAP2K1/2		group			4.67E-03	C3,IL1B,MMP9
PI3K p85		group			8.91E-03	IL6
Hsp70		group			1.61E-03	CXCL8,IL6	35 (5)
Ras		group			4.38E-02	CXCL8
Tnf receptor		group			7.76E-04	C3,CXCL8
Fibrinogen		complex			2.77E-06	CXCL1,CXCL8,ICAM1
Ikb		group			8.91E-03	MMP1
lipoxygenase		group			1.77E-02	CCL2
Histone h3		group			2.04E-05	CCL2,CXCL8,ICAM1,IGFBP3,IL1B,IL6,NFKBIA,PPP2R2B,SOD2	44 (8)
Ck2		complex			8.91E-03	ZFP36
C1q		complex			7.76E-04	CCL2,CXCL8
Vegf		group			4.38E-02	CXCL8
Erm		group			8.91E-03	ICAM1
Akt		group			7.05E-03	BCL2A1,CXCL8,MMP9	39 (7)
IRAK1/4		group			8.91E-03	IL1B
IKK (complex)		complex			1.77E-02	CXCL8
Pdgf (complex)		complex			8.91E-03	MMP1
NIK		group			1.77E-02	IL6
Integrin		complex			2.65E-02	MMP9
LDL		complex			4.33E-03	C3,IL1B,NAMPT
SAA		group			5.77E-03	ICAM1,MMP1	30 (7)
HAS2-AS1	1.498	other			8.91E-03	HAS2
RAB1B		other			3.29E-02	CXCL8,RHOBTB3
Igm		complex			2.60E-03	BCL2A1,CXCL8,NFKB2	12 (4)
KDM3A		transcription regulator			4.38E-02	GDF15
FGF16		growth factor			3.52E-02	MMP9
FFAR4		g-protein coupled receptor			2.65E-02	CXCL8
DGKE		kinase			1.77E-02	ICAM1
Tlr		group			7.10E-04	CCL2,CXCL8,IL6	37 (8)
THRAP3		transcription regulator			1.77E-02	HAS2
SENP7		peptidase			1.77E-02	CXCL8
NANOG		transcription regulator			3.69E-02	CCDC85A,HOPX,HSPA1A/HSPA1B
ADRM1		other			1.77E-02	NFKBIA
TNIP3		other			4.68E-04	CXCL8,IL6	36 (5)
Integrin alpha V beta 3		complex			8.91E-03	MMP1
RNASE2		enzyme			1.74E-03	CCL2,CXCL5,IL6	36 (6)
POPDC2		other			1.77E-02	IL1B
IL36B		cytokine			3.77E-05	CD83,CXCL8,IL6	45 (7)
CHI3L1		enzyme			3.24E-05	COL16A1,NAMPT,SLC39A14,TMEM158
PIP5K1A		kinase			1.77E-02	CXCL8
BMPR1A		kinase			4.38E-02	ID1
BPI		transporter			8.91E-03	ICAM1
CC2D1A		other			2.65E-02	IL6
TRIM38		other			1.16E-03	CXCL8,IL6	22 (6)
WBSCR22		enzyme			4.68E-04	CXCL8,IL6
MARCH6		enzyme			8.91E-03	DIO2
BTBD7		other			1.77E-02	MMP9
LILRA2		other			3.39E-03	CXCL8,IL6
SIRT6		enzyme			1.16E-03	CXCL8,IL6	8 (2)
TOX4		other			1.77E-02	TWIST1
HLA-DR		complex			8.91E-03	IL1B
MYADM		other			8.91E-03	ICAM1
CUZD1		other			8.91E-03	ID2
LILRA4		other			4.38E-02	IL6
DUOX1		enzyme			8.91E-03	CXCL8
NLRX1		other			4.38E-02	IL6
MTF1		transcription regulator			8.91E-03	MT2A
DGKH		kinase			2.36E-04	CCL2,CXCL8	45 (7)
PADI2		enzyme			2.13E-03	CXCL8,IL6
OSCAR		other			5.62E-05	CD83,CXCL8,ICAM1
BAHD1		other			8.91E-03	IGF2
HTR2B		g-protein coupled receptor			1.77E-02	SERPINB2
BMPR2		kinase			4.68E-04	ID1,ID2	2 (2)
P2RY6		g-protein coupled receptor			2.65E-02	CXCL8
IL33		cytokine			8.22E-04	CXCL8,IL1B,IL6	56 (17)
ZC3HAV1		other			4.38E-02	IL6
STK17A		kinase			2.73E-03	MT1X,SOD2
EGLN2		enzyme			8.91E-03	CXCL8
ZC3H12A	2.592	other			4.68E-04	CCL2,IL6	46 (11)
CPEB2		translation regulator			8.91E-03	TWIST1
SBDS		other			1.09E-05	FBXO32,GABRE,HSPA6,ID1,MT2A,MYD88,PCDH7
SENP5		peptidase			1.77E-02	CXCL8
CLEC7A		transmembrane receptor			2.13E-03	IL1B,IL6	38 (8)
CYSLTR2		g-protein coupled receptor			1.77E-02	CXCL8
GPBAR1		g-protein coupled receptor			1.77E-02	DIO2
BCR (complex)		complex			1.50E-02	BCL2A1,POU2F2,PRDM1
SMAD1/5		group			7.76E-04	ID1,ID2
AFAP1L2	-0.916	other			8.91E-03	CXCL8
Mac		complex			1.77E-02	ZFP36
Focal adhesion kinase		group			4.12E-03	ICAM1,IL6	30 (7)
hemoglobin		complex			1.77E-02	CXCL8
HMGA1		transcription regulator			2.23E-02	KIT,MMP9
S100A10	-0.644	other			1.16E-03	IL6,MMP1
AMH	-0.561	growth factor			1.61E-03	CXCL2,IER3
SCAVENGER receptor CLASS A		group			4.68E-04	CXCL8,IL6
Cebp		complex			7.76E-04	CXCL8,IL6
Gm-csf		group			1.39E-05	CXCL8,IL1B,IL6,MMP1,MMP9	49 (10)
HLA-DQ		complex			1.16E-03	IL1B,IL6
IGFBP7		transporter			8.91E-03	SOD2
NCF2		enzyme			8.91E-03	SOD2
CABIN1		other			1.77E-02	IL6
GIT1		kinase			3.52E-02	MMP9
FLNA		other			4.38E-02	MMP9
FLII		other			2.65E-02	CXCL8
MAX		transcription regulator			3.88E-02	FBXO32,ID2
AREG		growth factor			3.52E-02	PLAU
CASP1		peptidase			2.36E-04	IL1B,IL6	38 (6)
MAPK13	-0.719	kinase			2.65E-02	IL6
TIRAP		other			7.76E-04	CXCL8,IL6	38 (7)
NCOR2		transcription regulator			1.35E-02	C3,CXCL8
PELI1		enzyme			2.65E-02	IL6
PRKCE		kinase			1.92E-02	IL6,MMP9
TFAP2A		transcription regulator			6.19E-03	CXCL1,CXCL2,SOD2
ABL2		kinase			2.36E-04	MMP1,MMP3
PGF	-0.546	growth factor			6.87E-06	CCL2,CXCL8,IL1B	30 (8)
STAT1	-0.508	transcription regulator			1.18E-02	CCL2,ICAM1,MMP9
KL		enzyme			2.65E-02	SOD2
HDAC10		transcription regulator			1.77E-02	MMP9
SOX2		transcription regulator			4.72E-02	HOPX,JAG1
SMPD2		enzyme			4.68E-04	IL1B,IL6	30 (7)
PTEN		phosphatase			2.07E-02	CXCL8,IL6
BMP10		growth factor			1.36E-05	ID1,ID2,SMAD6
CXCL8	7.086	cytokine			3.69E-03	CXCL8,IL1B,MMP9	40 (10)
NCOR1		transcription regulator			2.93E-04	CD82,HAS2,MMP9
CSF1		cytokine			1.48E-02	IL1B,IL6
PROCR		other			1.77E-02	MMP9
SMAD2		transcription regulator			1.62E-02	HAS2,VEGFC
IL13RA2		transmembrane receptor			2.65E-02	MMP9
FANCA		other			3.52E-02	IL1B
DAPK1	-0.661	kinase			8.91E-03	CXCL8
MKL1		transcription regulator			2.65E-02	MMP9
SCARB1		transporter			1.77E-02	CCL2
REL		transcription regulator			3.04E-09	BCL2A1,CXCL8,IL6,MMP9,NFKB2,NFKBIA,RELB
PRKAA1		kinase			1.77E-02	IL6
NOD1		other			3.52E-02	CXCL8
USF1		transcription regulator			4.08E-02	FBXO32,IGFBP3
GNA14		enzyme			7.90E-05	CXCL8,IL6	26 (4)
HSPB2		other			6.87E-06	CCL2,CXCL8,ICAM1
ANG		enzyme			4.38E-02	IL6
JUNB	0.930	transcription regulator			1.08E-03	MMP1,MMP9,SERPINB2
ALB		transporter			4.38E-02	CXCL8
KCNN4	-2.754	ion channel			4.38E-02	CCL11
GDF2		growth factor			5.62E-05	ID1,ID2,SMAD6
MEFV		other			3.52E-02	CXCL8
POLR2A		enzyme			2.23E-02	NFKBIA,TNFAIP3
ACVR1	0.479	kinase			3.52E-02	ID1
ZBTB16		transcription regulator			5.77E-03	KIT,MMP9
NGF		growth factor			3.39E-03	CD83,WT1
DNMT1		enzyme			1.77E-02	CYP24A1,SERPINB2
THBD		transmembrane receptor			2.36E-04	IL1B,IL6	40 (9)
GFPT1		enzyme			8.91E-03	HAS2
TRPM2		ion channel			1.16E-03	CXCL8,SOD2
ITGAV	0.581	ion channel			9.84E-03	HAS2,MMP1
IL1R1		transmembrane receptor			7.76E-04	CXCL8,IL1B	36 (5)
MED7		transcription regulator			8.91E-03	TNFAIP3
ACVR2A		kinase			8.91E-03	ID1
MSX2		transcription regulator			2.65E-02	TWIST1
ID1	-1.365	transcription regulator			7.68E-03	ICAM1,MMP9
PROK2		other			4.38E-02	IL1B
CDH2	0.434	other			1.77E-02	MMP9
EZR	-0.661	other			4.38E-02	MMP9
CHRNA7		transmembrane receptor			2.65E-02	ID1
MAPK8		kinase			2.07E-02	MMP9,PTX3
TANK		other			1.77E-02	CXCL8
ADAM17		peptidase			3.52E-02	CXCL8
TRAF2		enzyme			2.36E-04	CCL2,CXCL8,IL6	54 (16)
BHLHE40		transcription regulator			2.65E-02	ID1
FN1		enzyme			8.22E-04	MMP1,MMP3,MMP9
CXCL10		cytokine			8.91E-03	MMP9
SLC52A1	-0.750	other			8.91E-03	ICAM1
IL3		cytokine			1.74E-03	CD83,IL1B,IL6
LILRB4		other			1.61E-03	IL1B,IL6	36 (6)
CD24		other			2.60E-04	CXCL8,GDF15,ICAM1,ISG20,PLAU,RELB
SP100		transcription regulator			7.90E-05	MMP1,PLAU
KSR2		kinase			8.91E-03	CXCL8
SLPI		other			3.52E-02	IGFBP3
CHUK		kinase			3.94E-05	CXCL8,ICAM1,IL6,NFKBIA	49 (11)
SP1		transcription regulator			5.89E-05	CCL2,CXCL8,GDF15,HAS2,IGF2,IGFBP3,KIT,PLAU,SOD2,TFPI2
INHBA	2.098	growth factor			1.74E-03	CCL2,CGA,SERPINB2
NPY		other			1.77E-02	IL6
LAMA3		other			7.90E-05	IL1B,MMP1
SIAH2		transcription regulator			1.77E-02	CYP24A1
SH3KBP1		other			1.16E-03	BCL2A1,PRDM1
MAP3K3		kinase			2.36E-04	CXCL8,TNFAIP3
CUL4A		other			1.77E-02	SOD2
SPI1		transcription regulator			1.29E-04	DUSP6,IL1B,MME,MT1X,MT2A
DUSP4		phosphatase			8.91E-03	IL6
ESR2		ligand-dependent nuclear receptor			3.40E-03	C3,CCL2,MMP1
DYRK1B		kinase			1.61E-03	SOD2,SOD3
PROC		peptidase			4.38E-02	MMP9
PYCARD	-1.034	transcription regulator			4.68E-04	CXCL8,IL1B
PRKCA		kinase			2.87E-07	CCL2,HSPA1A/HSPA1B,IGFBP3,MMP1,MMP3,MMP9,RHOBTB3	45 (7)
RBM8A		other			1.77E-02	IL6
mir-221		microrna			4.38E-02	KIT
miR-291a-3p (and other miRNAs w/seed AAGUGCU)		mature microrna			3.52E-02	C3
mir-515		microrna			2.13E-03	CXCL8,IL6
miR-494-3p (miRNAs w/seed GAAACAU)		mature microrna			1.77E-02	KIT
miR-9-5p (and other miRNAs w/seed CUUUGGU)		mature microrna			1.77E-02	PRDM1
miR-141-3p (and other miRNAs w/seed AACACUG)		mature microrna			4.38E-02	JAG1
mir-580		microrna			8.91E-03	TWIST1
mir-21		microrna			7.68E-03	IL6,MYD88
miR-616-3p (miRNAs w/seed GUCAUUG)		mature microrna			8.91E-03	TFPI2
mir-145		microrna			4.38E-02	IL6
miR-491-5p (and other miRNAs w/seed GUGGGGA)		mature microrna			4.38E-02	MMP9
miR-199a-5p (and other miRNAs w/seed CCAGUGU)		mature microrna			2.65E-02	MMP1
mir-373		microrna			4.12E-03	CXCL8,IL6
miR-224-5p (miRNAs w/seed AAGUCAC)		mature microrna			1.77E-02	MMP9
mir-224		microrna			1.77E-02	MMP9
miR-126a-5p (and other miRNAs w/seed AUUAUUA)		mature microrna			4.38E-02	KIT
LPL		enzyme			1.09E-04	CCL2,IL1B,IL6
F2RL1	1.353	g-protein coupled receptor			3.52E-02	CXCL8
EED		transcription regulator			4.38E-02	PPP2R2B
F3		transmembrane receptor			4.38E-02	CXCL8
PRTN3		peptidase			1.36E-05	CCL2,CXCL8,IL6	49 (11)
AMBP		transporter			8.91E-03	PLAU
TGFA		growth factor			5.77E-03	CXCL8,IL6
NR1H2		ligand-dependent nuclear receptor			2.65E-02	C3
mir-154		microrna			2.65E-02	KIT
BGN		other			7.90E-05	CCL2,CXCL8
DICER1		enzyme			1.55E-05	CXCL8,ICAM1,PLAU,RASGRP1,RFTN1,TRIM6	39 (5)
NCOA1		transcription regulator			5.03E-03	C3,HAS2,NFKBIZ
CCL21		cytokine			7.90E-05	CCL2,CXCL8	33 (9)
NOTCH3		transcription regulator			1.61E-03	ID1,PTX3
PRSS2		peptidase			1.77E-02	MMP3
CD14		transmembrane receptor			2.93E-04	CCL2,IL1B,IL6	46 (11)
H2AFY		other			1.74E-03	ID1,PLAU,SERPINB2
CREB1		transcription regulator			2.72E-05	CGA,CXCL8,DIO2,HAS2,SOD2
IRAK4		kinase			1.86E-04	CXCL8,IL1B,IL6	48 (14)
HOXB9		transcription regulator			4.38E-02	CXCL8
SUZ12		enzyme			5.54E-04	FBXO32,IGFBP3,LAMB3,PLAU,PPP2R2B
XBP1		transcription regulator			3.48E-02	ICAM1,IL6
BAZ1A		other			1.77E-02	IGFBP3
AXL	-0.446	kinase			1.16E-03	MMP1,MMP9	7 (3)
SFRP4		transmembrane receptor			4.38E-02	TWIST1
YWHAZ		enzyme			4.38E-02	MMP1
MBD2		transcription regulator			5.24E-04	DPP4,MMP9,PLAU,RELB
KRT14		other			1.84E-05	CXCL1,CXCL8,KRT18,MMP1,MMP9	13 (4)
LGALS3BP		transmembrane receptor			8.91E-03	IL6
FBN1		other			5.77E-03	MMP1,MMP3
HDAC3		transcription regulator			1.23E-03	CD82,CXCL8,MMP9
IL1R2		transmembrane receptor			4.68E-04	CXCL8,IL6
GBP1	0.652	enzyme			8.91E-03	MMP1
ADIPOQ		other			6.07E-04	CCL2,IL6,VEGFC	17 (3)
MED1		transcription regulator			3.20E-04	HAS2,ID2,LIF,PRDM1
ANXA2	-0.513	other			1.39E-03	IGFBP3,IL6,MMP1
HSPB3		other			6.96E-07	CCL2,CXCL8,ICAM1
ZEB1		transcription regulator			1.10E-02	KRT18,PLAU
UGDH		enzyme			1.77E-02	HAS2
YBX1		transcription regulator			8.22E-04	ID1,IGFBP3,MMP3
PLAUR	0.539	transmembrane receptor			4.12E-03	CCL2,PLAU
TSC22D1	0.609	transcription regulator			6.96E-07	CXCL8,IL1B,IL6
PPARA		ligand-dependent nuclear receptor			4.00E-03	C3,IGFBP2,IGFBP3
JUND		transcription regulator			1.10E-02	MMP9,SERPINB2
ITIH2		other			2.65E-02	TNFAIP6
CARD8		other			1.77E-02	BCL2A1
HS6ST1		enzyme			2.36E-04	CXCL8,IL6
ETV5		transcription regulator			3.88E-02	ICAM1,NCAM2
ETV1		transcription regulator			3.52E-02	MMP1
FOXO4		transcription regulator			7.68E-03	IER3,JAG1
TNFRSF25		transmembrane receptor			2.36E-04	CCL2,CXCL8
MAPKAPK5		kinase			1.77E-02	TNFAIP3
PDCD1		phosphatase			4.08E-02	CXCL8,IL6
PIK3CG		kinase			3.52E-02	MMP3
SOCS1	0.628	other			2.92E-02	CXCL2,ISG20
PLAU	1.347	peptidase			3.52E-02	ICAM1
ATM		kinase			1.39E-03	CXCL8,IL6,TNFAIP3	35 (5)
GH1		growth factor			5.77E-03	IGFBP3,ZFP36
APP		other			5.15E-04	HSPA1A/HSPA1B,IL1B,IL6
CALM1 (includes others)	-0.377	other			8.91E-03	TNFAIP3
SAA1		transporter			7.76E-04	CXCL8,IL1B	48 (13)
ITGAM		transmembrane receptor			4.68E-04	CXCL8,IL1B	42 (6)
AURKB		kinase			1.22E-02	CD82,IER3
TLR5		transmembrane receptor			3.39E-03	CXCL8,IL6	7 (3)
CXCR4		g-protein coupled receptor			2.93E-04	CCL2,CXCL8,IL6	49 (13)
MAPK9		kinase			1.18E-02	CCL2,LMO7,PTX3
LPAR1	-0.419	g-protein coupled receptor			3.77E-05	CXCL8,IL6,MMP9	22 (3)
DDR1		kinase			1.77E-02	MMP1
NOXO1		other			1.77E-02	SOD2
XIAP		enzyme			1.36E-05	CXCL1,CXCL8,IL6	15 (4)
KCNMA1		ion channel			2.65E-02	CXCL8
PSMB1		peptidase			1.77E-02	SERPINB2
SUPT16H		transcription regulator			8.22E-04	HSPA1A/HSPA1B,ID2,PLAU
CDH1		other			1.74E-03	MMP1,MMP3,MMP9	45 (9)
DDB2	-0.905	other			2.37E-05	MMP9,NFKBIA,SOD2
KRAS		enzyme			5.42E-05	CXCL8,DUSP6,IER3,IL1B,LAMB3
GLI2		transcription regulator			4.12E-03	IL6,JAG1
IL36G		cytokine			1.77E-02	CD83
PLA2G4A		enzyme			2.77E-06	CXCL8,IL1B,IL6
RETN		other			2.13E-03	CCL2,IL6	30 (7)
CD74		transmembrane receptor			1.77E-02	CXCL8
LIMA1		other			4.12E-03	ID2,KRT18
IGFBP3	-1.599	other			3.52E-02	ICAM1
LCOR		transcription regulator			2.65E-02	TFPI2
NOD2		other			2.35E-08	BCL2A1,CCL2,CXCL8,IL1B,TWIST1	58 (16)
TGFB1I1		transcription regulator			2.65E-02	ID1
LDB1		transcription regulator			1.77E-02	KIT
ACKR1		g-protein coupled receptor			1.77E-02	CCL2
PAX5		transcription regulator			3.52E-02	PRDM1
PKNOX1		transcription regulator			4.68E-04	CCL2,PLAU
NFYC		transcription regulator			3.52E-02	COL5A3
BCL6		transcription regulator			1.12E-02	DUSP6,MGP,PRDM1
MECP2		transcription regulator			1.94E-03	DPP4,IGFBP3,TFPI2
PIN1		enzyme			5.77E-03	BCL2A1,IL6
SYK		kinase			1.09E-04	CCL2,CXCL8,IL6	46 (13)
NFE2L2		transcription regulator			7.68E-03	CXCL8,SOD2
VDR		transcription regulator			2.36E-04	CXCL8,CYP24A1,IGFBP3
P2RY2		g-protein coupled receptor			1.77E-02	CXCL8
SP3		transcription regulator			1.20E-04	GDF15,HAS2,IGF2,IGFBP3,PLAU,SOD2	22 (3)
ATF3		transcription regulator			9.84E-03	CD82,ID1
IDO1		enzyme			8.91E-03	IL6
RAC1		enzyme			7.68E-03	MMP1,SOD2
GTF2B		transcription regulator			1.48E-02	NFKBIA,TNFAIP3
MAPKAPK2		kinase			2.77E-06	CXCL8,ICAM1,IL6
TPSD1		peptidase			8.91E-03	CXCL8
CPEB1		translation regulator			8.91E-03	TWIST1
PAK6		kinase			1.77E-02	MMP9
SMAD4		transcription regulator			4.40E-02	IER3,JAG1,NAMPT
LPA		other			2.36E-04	CXCL8,SERPINB2
GMFG		growth factor			2.65E-02	IL6
TAB2		other			1.77E-02	CD82
CTSB		peptidase			3.52E-02	IL1B
PIK3R1		kinase			1.09E-04	CXCL8,ICAM1,PLAU
AIF1		other			8.91E-03	IL6
FCGR2A		transmembrane receptor			3.39E-03	IL1B,IL6
OTUD7B		peptidase			7.76E-04	CXCL8,ICAM1	37 (5)
SOCS3		phosphatase			6.70E-03	IL6,ISG20
FCER1A		transmembrane receptor			8.91E-03	IL6
WISP2		growth factor			4.00E-03	KRT18,LAMB3,TWIST1
MAP3K14	-0.656	kinase			1.22E-04	CXCL8,IL6,NFKBIA,TNFAIP6	37 (5)
IGFBP2	-1.093	other			2.07E-02	EPHA4,GDF15
PTAFR		g-protein coupled receptor			7.76E-04	CXCL8,IL6	30 (7)
HSPB6	-1.360	other			6.96E-07	CCL2,CXCL8,ICAM1
IGFBP4		other			1.77E-02	IGFBP3
PTH		other			3.52E-02	IL6
CKS1B		kinase			2.65E-02	CXCL8
MAP2K7		kinase			3.52E-02	MMP3
BCL3	0.618	transcription regulator			4.15E-07	CD82,CXCL8,ID1,ID2
GABPB1		transcription regulator			3.52E-02	OXTR
FGFR1		kinase			2.93E-04	IL11,IL6,POU2F2
ACVRL1		kinase			1.77E-02	ID1
FANCC		other			8.14E-05	GDF15,IGFBP3,IL1B,JAG1,PTX3
TAC1		other			1.16E-03	IL1B,IL6
TRAF6		enzyme			1.09E-04	CCL2,CXCL8,IL6	55 (17)
HOXA9		transcription regulator			3.52E-02	CCL2
OCLN		enzyme			1.36E-05	MMP1,MMP3,MMP9
DNAJA3		other			2.65E-02	CXCL8
AHR		ligand-dependent nuclear receptor			1.94E-03	IL1B,IL6,SERPINB2
CDKN2C	-0.873	transcription regulator			7.90E-05	CCL2,MMP3
CEACAM1		other			3.52E-02	VEGFC
PRB1/PRB2		other			8.91E-03	SERPINB2
HTRA1		peptidase			2.36E-04	MMP1,MMP3
VIM		other			4.38E-02	PLAU
PTGS1		enzyme			1.77E-02	MMP9
RNASE1		enzyme			8.22E-04	CCL2,CXCL5,IL6
CD163		transmembrane receptor			4.68E-04	IL1B,IL6	35 (5)
RARG	-0.596	ligand-dependent nuclear receptor			4.38E-02	HAS2
HNRNPA2B1		other			2.42E-04	GDF15,GPRC5B,IGFBP2,PAPPA,SEMA3B,TFPI2,TWIST1
NKX3-1	0.456	transcription regulator			2.65E-02	IGFBP3
MSC	2.082	transcription regulator			3.52E-02	POU2F2
STK11		kinase			7.98E-05	CCL2,ETV4,IL6
LPAR2		g-protein coupled receptor			4.68E-04	CXCL8,IL6
CCNT1		transcription regulator			2.65E-02	CXCL8
SND1		enzyme			2.07E-02	ID1,JAG1
NLRP12		other			3.77E-05	CXCL8,IL1B,IL6
PSIP1		other			8.91E-03	VEGFC
TNFRSF12A		transmembrane receptor			3.17E-10	CCL2,CXCL8,IL6,MMP1,MMP3
ADORA2B		g-protein coupled receptor			4.68E-04	CXCL8,IL6
MAP3K8	1.091	kinase			4.68E-04	CXCL8,IL1B	30 (7)
HSPB8	-0.552	kinase			6.96E-07	CCL2,CXCL8,ICAM1	43 (7)
FGF2	0.493	growth factor			3.29E-02	MMP1,MMP9
MMP8		peptidase			7.90E-05	CXCL8,IL6
NTRK1		kinase			4.38E-02	SOD2
IKBKG		kinase			4.68E-04	CXCL8,ICAM1	36 (6)
EGR1		transcription regulator			2.37E-03	CXCL8,GDF15,IGF2
LEPR		transmembrane receptor			1.16E-03	IGFBP3,LIF
ADIPOR1		transmembrane receptor			1.77E-02	IL6
CTGF		growth factor			1.62E-02	MMP3,MMP9
SCD		enzyme			2.73E-03	CXCL3,CXCL8
ATG7		enzyme			3.77E-05	CXCL8,IL1B,IL6	45 (9)
BTK		kinase			3.40E-03	CXCL8,IL6,ISG20	36 (5)
ITGAX		transmembrane receptor			4.68E-04	CXCL8,IL1B
NLRP3		other			8.91E-03	IL1B
ZNF350		transcription regulator			8.91E-03	MMP9
BMX		kinase			8.91E-03	CXCL8
ECSIT		transcription regulator			6.87E-06	IL1B,IL6,NFKB2	35 (5)
SENP6		peptidase			1.77E-02	CXCL8
MAP3K10		kinase			8.91E-03	CXCL8
NOV		growth factor			2.65E-02	MMP9
GNA13		enzyme			1.77E-02	CXCL8
WWOX		enzyme			4.38E-02	MMP9
TBP		transcription regulator			1.06E-04	IER3,NFKBIA,PPP2R2B,TNFAIP3	17 (2)
PRMT1		enzyme			7.68E-03	CCL11,MT2A
CARD11	-0.588	kinase			2.65E-02	MME
CEBPD		transcription regulator			9.46E-04	CXCL8,IL1B,IL6
IGF2BP3		translation regulator			2.65E-02	IGF2
MED21		transcription regulator			8.91E-03	TNFAIP3
PSMD10		transcription regulator			2.93E-04	CXCL1,CXCL8,ICAM1
CLU	-0.905	other			2.73E-03	CXCL8,IL6
BMPR1B		kinase			1.77E-02	ID1
FABP5		transporter			2.65E-02	CXCL8
FASN		enzyme			1.61E-03	CXCL8,IL6
FOSL2		transcription regulator			4.91E-03	CXCL8,SERPINB2
IL18RAP		transmembrane receptor			6.87E-06	CXCL8,IL32,IL6
ITGA3		other			1.77E-02	PLAU
ITGB3	0.429	transmembrane receptor			4.12E-03	HAS2,MMP1
ITIH1		other			2.65E-02	TNFAIP6
PHB		transcription regulator			4.38E-02	CXCL8
PLA2G2A		enzyme			4.68E-04	CXCL8,IL6
RASGRF1		other			8.91E-03	MMP3
RORC		ligand-dependent nuclear receptor			4.91E-03	IL1B,IL6
ETS2	0.614	transcription regulator			2.36E-04	CGA,MMP1,MMP3
TAL1		transcription regulator			2.85E-04	C3,CACNG4,KIT,SERPINB2,ZC3H12A
THBS1	0.503	other			7.76E-04	IL1B,IL6
SENP1		peptidase			1.77E-02	MMP9
SIRT1		transcription regulator			3.29E-02	MMP3,MMP9
RSL1D1	0.378	other			8.91E-03	PLAU
GPR32		g-protein coupled receptor			7.90E-05	CXCL8,IL6	14 (4)
TAF4B	0.794	transcription regulator			2.77E-06	IER3,NFKBIA,TNFAIP3
TMEM9B		other			7.90E-05	CXCL8,IL6
CDH5		other			8.91E-03	ICAM1
SSRP1		other			1.92E-02	ID2,PLAU
POSTN		other			3.52E-02	MMP9
SMPD1		enzyme			2.65E-02	IL6
TCF12		transcription regulator			3.88E-02	CACNG4,ZC3H12A
VCP		enzyme			1.77E-02	CXCL8
LMO2	1.259	other			2.65E-02	KIT
KITLG		growth factor			2.07E-02	CCL2,KIT
YY1		transcription regulator			1.23E-03	HAS2,IL1B,VEGFC
TCF4		transcription regulator			3.48E-02	ID2,PLAU
SERPINB5		other			1.77E-02	KRT18
ILF3		transcription regulator			1.77E-02	PLAU
PLG		peptidase			1.09E-04	CCL2,IL1B,IL6	49 (15)
RTKN		other			4.68E-04	BCL2A1,TNFAIP3
PDPK1		kinase			7.90E-05	CXCL8,IL6	43 (8)
PTHLH		other			1.86E-04	HSPA1A/HSPA1B,IL6,PLAU
LGALS3	-0.519	other			4.78E-04	DUSP6,ICAM1,IL6,KRT18
CDK5		kinase			1.16E-03	IGFBP3,TNFAIP3
SIN3A		transcription regulator			1.77E-02	FBXO32,MMP9
LPAR3	-0.631	g-protein coupled receptor			2.36E-04	CXCL8,IL6
IFNB1		cytokine			3.48E-02	CXCL8,MMP9
DACH1		transcription regulator			4.68E-04	CXCL8,IL6
CREB3		transcription regulator			8.91E-03	MMP9
LIPG		enzyme			7.98E-05	CCL2,IL1B,IL6
PLAT		peptidase			8.91E-03	MMP9
AIM2		other			8.91E-03	IL1B
HSPD1		enzyme			3.39E-03	ICAM1,IL6	39 (10)
PELI2		other			8.91E-03	CXCL8
FIGF		growth factor			1.77E-02	VEGFC
TLR6		transmembrane receptor			4.91E-03	CXCL8,IL6	36 (6)
NOS2		enzyme			3.39E-03	IL32,IL6
NEU3	-0.444	enzyme			3.52E-02	MMP1
TFAP2B		transcription regulator			1.36E-05	IGF2,KIT,SOD2
FOSB		transcription regulator			4.68E-04	MMP9,SERPINB2
DLX3		transcription regulator			8.91E-03	CGA
ENTPD1		enzyme			8.91E-03	CXCL8
IL15	0.857	cytokine			4.72E-02	MYD88,ZFP36
IRAK2	2.182	kinase			7.76E-04	CXCL8,IL1B
CD99		other			2.65E-02	MMP9
CCR1		g-protein coupled receptor			1.77E-02	MMP9
ELF4		transcription regulator			3.58E-04	CXCL2,CXCL8,KIT
TBK1		kinase			4.91E-03	CXCL8,IL6	38 (7)
IFNA2		cytokine			6.49E-03	IFI44,IL6,ISG20,MMP9
PTGER1		g-protein coupled receptor			2.77E-06	CXCL8,ICAM1,VEGFC
PRKD1		kinase			4.68E-04	MMP1,MMP3
INHBC		growth factor			8.91E-03	INHBA
BCL10		transcription regulator			1.77E-02	CXCL8
TAGLN		other			8.91E-03	MMP9
CD47		transmembrane receptor			4.68E-04	IL1B,IL6
AR	-1.017	ligand-dependent nuclear receptor			1.83E-02	GDF15,IGFBP3,IL6,LRIG1,MME
ZNF217	0.436	transcription regulator			2.46E-02	CCL2,IGFBP3,KRT18
HDAC1		transcription regulator			2.46E-05	CXCL8,ID1,IL6,MMP9,PPP2R2B,SERPINB2	48 (13)
SPINT2		other			4.12E-03	PAPPA,PLAU
SNAI1		transcription regulator			6.07E-04	ID1,KRT18,MMP9
ABL1		kinase			2.73E-03	IER3,MMP1
HRAS		enzyme			1.03E-05	CXCL8,IGF2,IL1B,IL6,TWIST1	45 (14)
STAT5A		transcription regulator			4.82E-04	C15orf48,CXCL5,GCHFR,KIT,LAMB3,SCG5
FCER1G		transmembrane receptor			3.77E-05	CXCL8,IL1B,IL6	23 (5)
TNFSF10		cytokine			1.22E-02	CXCL8,NFKBIA
IL15RA	0.958	transmembrane receptor			2.65E-02	IL6
GPX4		enzyme			8.91E-03	MMP1
HSF2		transcription regulator			2.73E-03	HSPA1A/HSPA1B,IL1B
FPR2		g-protein coupled receptor			2.37E-05	CCL2,CXCL8,IL6	49 (14)
SPIB		transcription regulator			4.38E-02	PRDM1
CDK7		kinase			4.38E-02	TNFAIP3
NRXN1		transporter			3.10E-02	ITGA7,MGP
PRKACA		kinase			1.77E-02	HSPA1A/HSPA1B
IL1RL1		transmembrane receptor			8.91E-03	CXCL8
GSK3B		kinase			2.85E-03	CCL2,CD82,IL6
OSM		cytokine			1.94E-03	CCL2,IL1B,IL6	48 (14)
CDK2		kinase			8.91E-03	TNFAIP3
RHOA		enzyme			2.13E-03	GDF15,IL1B
TNFSF15		cytokine			7.76E-04	CXCL8,MMP9	47 (11)
NFKBIA	1.885	transcription regulator			2.15E-07	CXCL8,ICAM1,IL1B,IL6,MMP9	48 (9)
SUV39H1		enzyme			1.61E-03	SERPINB2,SOD2
PLAA		other			7.76E-04	IL32,IL6
FXYD5		ion channel			8.91E-03	CCL2
PARK7		enzyme			7.90E-05	CXCL8,ICAM1
RELB	2.061	transcription regulator			2.24E-08	IL1B,IL6,NFKB2,NFKBIA,RELB,SOD2	47 (10)
CREBBP		transcription regulator			3.88E-02	CXCL8,HAS2
TXN		enzyme			9.46E-04	ICAM1,IL1B,NFKBIA	58 (12)
CASP10		peptidase			1.77E-02	IL6
FASLG		cytokine			7.90E-05	CCL2,IL6
CTNNB1		transcription regulator			3.85E-04	CXCL8,CYP24A1,DIO2,MME,MMP1,MMP9,PLAU	34 (6)
GAPDH		enzyme			2.92E-02	CCL2,CXCL1
HBB		transporter			8.91E-03	CXCL8
CD300C		transmembrane receptor			2.65E-02	CXCL8
CUX1		transcription regulator			3.68E-02	CXCL1,RHOBTB3
COL17A1		other			7.90E-05	CXCL8,IL6
MUC4		other			1.44E-04	KRT18,MMP9,TWIST1
C5		cytokine			1.44E-04	CXCL8,IL1B,IL6	45 (10)
HIC1		transcription regulator			1.64E-02	CYP24A1,INHBA,LIF
MUC1		transmembrane receptor			1.10E-02	CD83,IL6
P2RX7		ion channel			6.70E-03	IL1B,IL6
BRD4		kinase			3.15E-02	CXCL2,ID2,PRDM1
NKRF		transcription regulator			1.77E-02	CXCL8
BST2		other			3.52E-02	IL6
GBA		enzyme			8.91E-03	IL6
PBX2		other			1.77E-02	CCL2
PELP1		other			3.69E-03	FMN2,IFI44,KCNE4
IL37		cytokine			2.13E-03	IL1B,IL6
S100A7		other			6.87E-06	CXCL1,CXCL8,IL11
MAP3K11		kinase			2.65E-02	CXCL8
SMAD6	-1.379	transcription regulator			2.65E-02	IL6
BRAF		enzyme			1.22E-02	MMP1,MMP9
HS6ST2		enzyme			2.36E-04	CXCL8,IL6
OLR1		transmembrane receptor			1.61E-03	MMP1,MMP3
CD28		transmembrane receptor			3.47E-02	CXCL8,NFKBIA,TNFAIP3
IL17F		cytokine			6.87E-06	CCL2,CXCL1,CXCL5	45 (7)
MYC		transcription regulator			2.68E-02	FBXO32,ID2,MGP,NFKBIA,PLAU
KLF11		transcription regulator			1.10E-02	DIO2,SOD2
LILRB1		transmembrane receptor			2.65E-02	CXCL8
TNFRSF10B		transmembrane receptor			8.91E-03	CXCL8
CYBA		enzyme			1.77E-02	SOD2
GNA15		enzyme			4.68E-04	CXCL8,IL6	26 (4)
CSNK2A1		kinase			8.91E-03	ZFP36
TCF		group			2.94E-02	CYP24A1,DIO2,MME
